# Supplementary material
Source: PubMed Central journal article supplement (PMC8459201)
Supplement: NIHMS1734871-supplement-Supple_figs_tables.pdf [file NIHMS1734871-supplement-Supple_figs_tables.pdf]

## Supporting Information

## Table of Contents

|                                                                                                                                                                                           |     |
|-------------------------------------------------------------------------------------------------------------------------------------------------------------------------------------------|-----|
| <b>Section S1.</b> NMR Characterization.....                                                                                                                                              | S3  |
| a. <b>Figure S1.</b> <sup>1</sup> H and <sup>13</sup> C NMR assignments of <b>2</b> (in MeOD).....                                                                                        | S3  |
| b. <b>Figure S2.</b> <sup>1</sup> H NMR of A) pure equilibrated (red) and B) diastereomeric mixture (blue) of <b>2</b> in MeOD.....                                                       | S4  |
| <b>Section S2.</b> Photophysical Measurements.....                                                                                                                                        | S5  |
| a. <b>Figure S3A.</b> Transient spectroscopy data (in ethanol) for <b>2</b> at different delay times.....                                                                                 | S5  |
| b. <b>Figure S3B.</b> Relationship between $\tau_F$ and viscosity for <b>1</b> and <b>2</b> in different solvents.....                                                                    | S5  |
| c. <b>Figure S4.</b> Lifetime data for A) parent heptamethine indocyanine <b>1</b> and B) constrained heptamethine indocyanine <b>2</b> in different solvents.....                        | S6  |
| d. <b>Figure S5.</b> Lifetime data for A) parent heptamethine indocyanine <b>1</b> and B) constrained heptamethine indocyanine <b>2</b> at different temperatures (in °C) in ethanol..... | S7  |
| e. <b>Table S1.</b> Photophysical data collected for <b>1</b> and <b>2</b> in protic and aprotic solvents.....                                                                            | S8  |
| <b>Section S3.</b> Computational Chemistry Methods and Results.....                                                                                                                       | S9  |
| a. <b>Table S2.</b> Computed absorbance (top section) and emission (bottom section) energies vs. experimentally measured (eV).....                                                        | S10 |
| b. <b>Figure S6.</b> Computed and experimental absorbance and emission energies (nm).....                                                                                                 | S11 |
| c. <b>Figure S7.</b> Chain bond length (top) and bond angle (bottom) changes when going from parent indocyanine to its conformationally restricted form.....                              | S12 |
| <b>Section S4.</b> <sup>1</sup> H, <sup>13</sup> C and Associated 2D NMR Spectra.....                                                                                                     | S13 |
| <b>Section S5.</b> Raw B3LYP-PCM/cc-pVTZ and TDDFT-B3LYP-PCM/cc-pVTZ Results .....                                                                                                        | S18 |
| <b>Section S6.</b> Raw ORMAS-PT2-PCM/6-31G(d) Results.....                                                                                                                                | S43 |
| <b>Section S7.</b> References.....                                                                                                                                                        | S67 |

Section S1. NMR Characterization

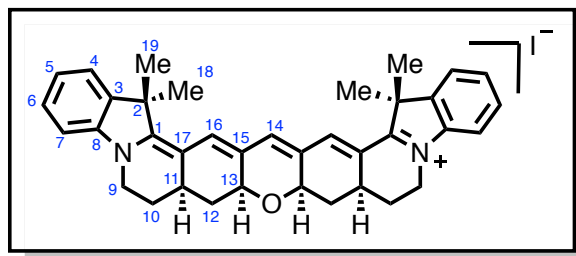

| Position | $\delta_{\text{H}}$ (mult., $J$ in Hz)                                                                 | $\delta_{\text{C}}$ (mult., $J$ in Hz) |
|----------|--------------------------------------------------------------------------------------------------------|----------------------------------------|
| 1        | –                                                                                                      | 167.9                                  |
| 2        | –                                                                                                      | 50.0                                   |
| 3        | –                                                                                                      | 143.6 or 142.5                         |
| 4 – 7    | 7.47 (d, $J = 6.9$ Hz, 2H), 7.39 (td, $J = 7.8, 1.2$ Hz, 2H), 7.24 (t, $J = 7.4$ Hz, 2H), 7.21 (m, 2H) | 143.1, 129.7, 126.1, 123.3             |
| 8        | –                                                                                                      | 143.6 or 142.5                         |
| 9        | 4.28 (dd, $J = 13.7, 4.1$ Hz, 2H), 3.80 (td, $J = 13.2, 4.0$ Hz, 2H)                                   | 44.1                                   |
| 10       | 2.40 – 2.32 (m, 2H)<br>1.76 – 1.73 (m, 2H)                                                             | 28.8                                   |
| 11       | 2.80 (tt, $J = 12.4, 4.1$ Hz, 2H)                                                                      | 32.6                                   |
| 12       | 2.44 (dt, $J = 11.4, 4.3$ Hz, 2H)<br>1.45 (q, $J = 11.7$ Hz, 2H)                                       | 36.5                                   |
| 13       | –                                                                                                      | 73.8                                   |
| 14       | 7.22 (s, 1H)                                                                                           | 111.1                                  |
| 15       | –                                                                                                      | 132.7                                  |
| 16       | 7.50 (s, 2H)                                                                                           | 141.3                                  |
| 17       | –                                                                                                      | 115.4                                  |
| 18 – 19  | 1.70 (d, $J = 4.5$ Hz, 12H)                                                                            | 28.2, 27.7                             |

Figure S1.  $^1\text{H}$  and  $^{13}\text{C}$  NMR assignments of **2** (in MeOD).

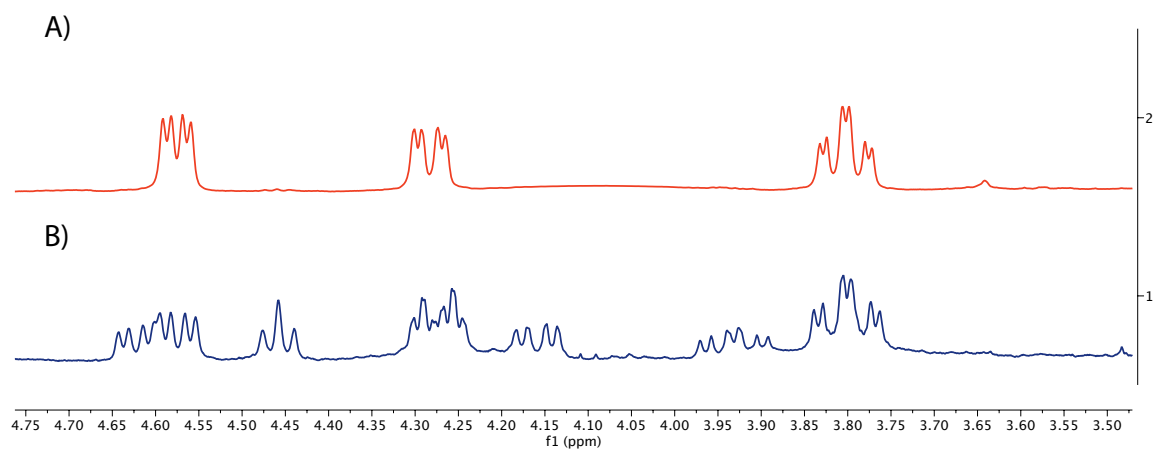

**Figure S2.** <sup>1</sup>H NMR of A) pure equilibrated (red) and B) diastereomeric mixture (blue) of **2** in MeOD.

## Section S2. Photophysical measurements

A)

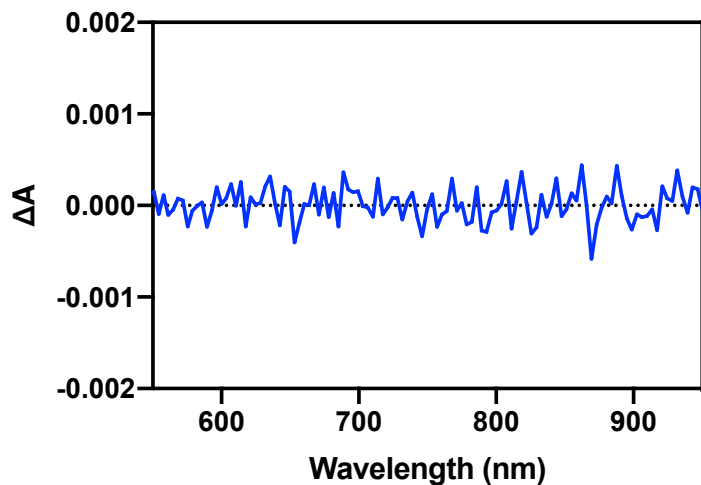

B)

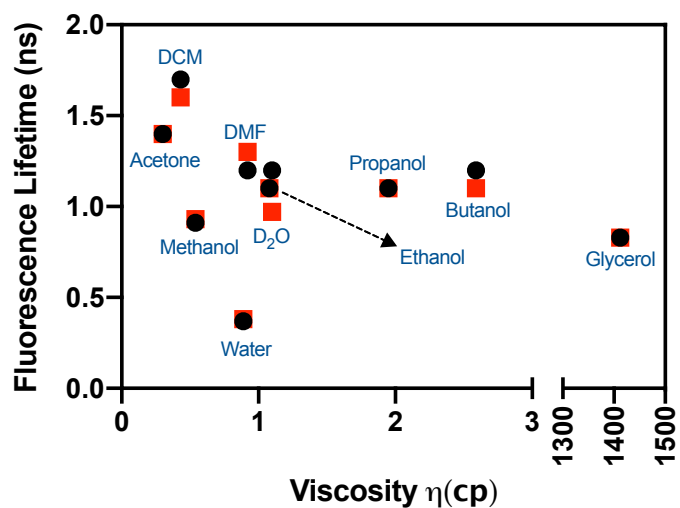

**Figure S3.** A) Difference transient absorption spectrum of **1** in glycerol at a 50 ns delay time. The positive absorption signal observed with **1** in ethanol (Figure 2A) is not observed in glycerol at any delay time. B) Relationship between Fluorescence lifetime ( $\tau_F$ ) and viscosity for **1** (black circle) and **2** (red square) in different solvents.

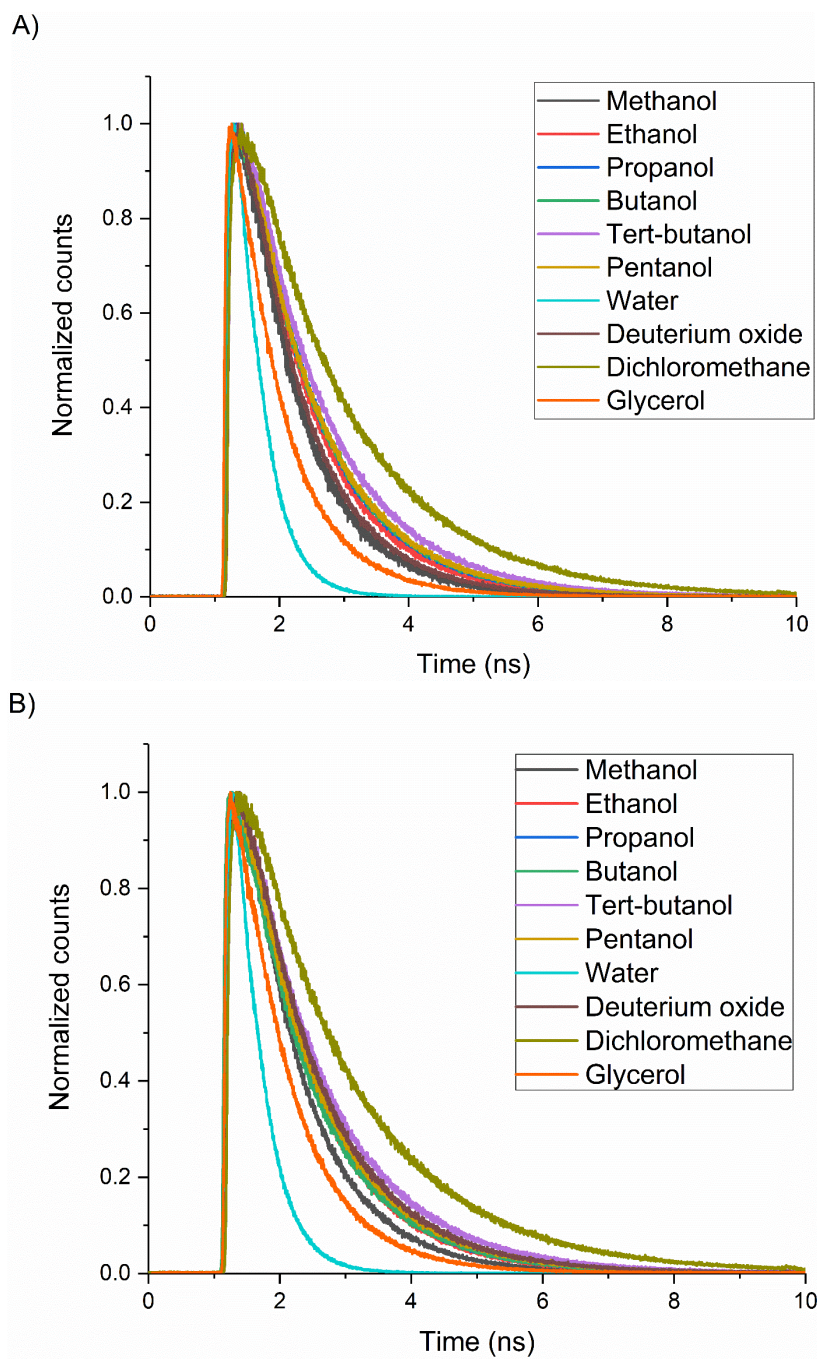

**Figure S4.** Lifetime data for A) parent heptamethine indocyanine **1** and B) constrained heptamethine indocyanine **2** in different solvent. Lifetimes are listed in Table S1.

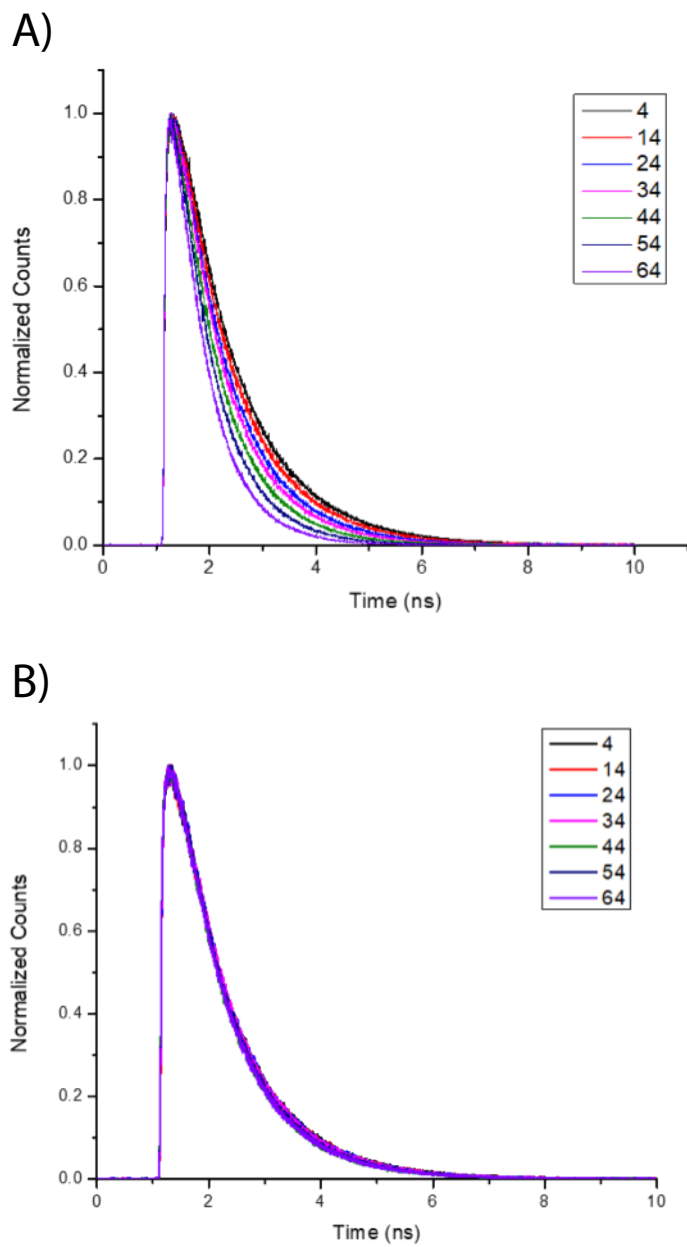

**Figure S5.** Lifetime data for A) parent heptamethine indocyanine **1** and B) constrained heptamethine indocyanine **2** at different temperatures (as shown in the legend; in °C) in ethanol.

**Table S1.** Photophysical data collected for **1** and **2** in protic and aprotic solvents

| Solvents         | <i>Solvent Properties</i> |                       | <i>Parent heptamethine indocyanine, 1</i> |                   |               | <i>Conformationally restrained heptamethine indocyanine, 2</i> |               |               |        |
|------------------|---------------------------|-----------------------|-------------------------------------------|-------------------|---------------|----------------------------------------------------------------|---------------|---------------|--------|
|                  | Dielectric constant       | Viscosity $\eta$ (cp) | $\phi_F$                                  | $\tau_F$ (ns)     | $\ln(k_{nr})$ | $\phi_F$                                                       | $\tau_F$ (ns) | $\ln(k_{nr})$ |        |
| Protic Solvents  | Methanol                  | 33.6                  | 0.54                                      | 0.24              | 0.91          | -0.180                                                         | 0.29          | 0.93          | -0.270 |
|                  | Ethanol                   | 25                    | 1.08                                      | 0.24 <sup>‡</sup> | 1.1           | -0.370                                                         | 0.31          | 1.1           | -0.466 |
|                  | Propanol                  | 21.51                 | 1.95                                      | 0.26              | 1.1           | -0.396                                                         | 0.3           | 1.1           | -0.452 |
|                  | Butanol                   | 18.34                 | 2.59                                      | 0.30              | 1.2           | -0.539                                                         | 0.32          | 1.1           | -0.481 |
|                  | Tert-butanol              | 18.74                 | 6.68                                      | 0.35              | 1.2           | -0.613                                                         | 0.34          | 1.3           | -0.678 |
|                  | Pentanol                  | 15.8                  | 3.5                                       | 0.31              | 1.2           | -0.553                                                         | 0.32          | 1.2           | -0.568 |
|                  | Water *                   | 80.36                 | 0.89                                      | 0.064             | 0.37          | 0.928                                                          | 0.081         | 0.38          | 0.883  |
|                  | Glycerol                  | 42.5                  | 1412                                      | 0.26              | 0.83          | -0.115                                                         | 0.28          | 0.83          | -0.142 |
| Aprotic Solvents | DCM                       | 9.02                  | 0.43                                      | 0.46              | 1.6           | -1.086                                                         | 0.40          | 1.7           | -1.041 |
|                  | D <sub>2</sub> O          | 78.3                  | 1.1                                       | 0.2               | 0.97          | -0.193                                                         | 0.18          | 1.2           | -0.381 |
|                  | Acetone                   | 21.36                 | 0.30                                      | 0.33              | 1.4           | -0.737                                                         | 0.37          | 1.4           | -0.799 |
|                  | DMF                       | 37.06                 | 0.92                                      | 0.31              | 1.3           | -0.633                                                         | 0.34          | 1.2           | -0.598 |

- \*Contains 5% DMSO in all steady-state experiments (no DMSO in lifetime experiments).



### Section S3. Computational Chemistry Methods and Results

Quantum chemistry calculations were performed using a local version of the GAMESS package and molecular orbitals were illustrated using MacMolPlt.<sup>1-3</sup> The 6-31G(d) and cc-pVTZ basis sets have been used.<sup>4-5</sup>

Density functional theory (DFT) utilizing the B3LYP functional was used to optimize ground state (S0) geometries.<sup>6-8</sup> The time-dependent density functional theory (TDDFT) method<sup>6-12</sup> was used to compute vertical excitation, or absorbance, energies (S0 → S1\*) at ground state (S0) optimized geometries, as well as deexcitation, or emission, energies (S1 → S0\*) at singlet excited state optimized geometries (S1).<sup>10-15</sup> Ground state (S0) DFT and excited state (S1) TDDFT computations used the Euler-MacLaurin radial and Lebedev angular grids with respective dimensions (96, 302) and (48, 110).<sup>16-18</sup> All reported DFT and TDDFT results used the cc-pVTZ basis set.

The occupation restricted multiple active space (ORMAS) method with second-order perturbation theory correction (ORMAS-PT2) was also used to compute vertical excitation (absorbance) energies and deexcitation (emission) energies.<sup>19-21</sup> ORMAS-PT2 calculations were performed using the 6-31G(d) basis set at B3LYP/6-31G(d) ground state (S0; vertical excitation energy) and TDDFT-B3LYP/6-31G(d) excited state (S1; deexcitation energy) optimized geometries. For each system the ORMAS active space contained all valence  $\pi$  electrons ( $e$ ), orbitals ( $o$ ) and the associated configuration interaction (CI) spaces were constructed as follows: we start with the (2 electron, 2 orbital) base active space

(HOMO-like orbital + LUMO-like orbital with two electrons, i.e., (2,2) active space)

(doubly occupied valence  $\pi$  orbitals not including HOMO-like orbital)

and apply all single and double excitations out of this reference and into a virtual orbital space containing only the remaining valence  $\pi$  orbitals. HOMO and LUMO refer to the highest occupied molecular orbital and lowest unoccupied molecular orbital, respectively, in a closed-shell wavefunction. These ORMAS wavefunctions represent active spaces of (20 $e$ , 19 $o$ ), (22 $e$ , 21 $o$ ), and (24 $e$ , 23 $o$ ) for the parent and conformationally restrained versions of trimethine, pentamethine, and heptamethine indocyanines, respectively. The ORMAS S0 and S1 wavefunctions were then simultaneously optimized (for orbitals and CI coefficients) by minimizing the average of the energies of the ground (S0) and excited (S1) singlet states. For example, for parent heptamethine indocyanine the \$DET/\$ORMAS GAMESS input specifications were:

```
$det   ncore=98 nels=24 nact=23 nstate=3 wstate(1)=1,1 $end
$ormas nspace=3 mstart(1)=99,110,112 mine(1)=20,0,0 maxe(1)=22,4,2 $end
```

and for conformationally restrained heptamethine indocyanine they were:

```
$det   ncore=129 nels=24 nact=23 nstate=3 wstate(1)=1,1 $end
$ormas nspace=3 mstart(1)=130,141,143 mine(1)=20,0,0 maxe(1)=22,4,2 $end
```

Subsequent ORMAS-PT2 energies for each state (S0 and S1) were then computed by modeling all single and double valence electron excitations out of the individual S0 and S1 ORMAS reference wavefunctions (1s orbitals were kept core).

All calculations were performed in solvent (water) phases via the polarizable continuum model (PCM) approach for the DFT, TDDFT, ORMAS, and ORMAS-PT2 methods.<sup>22-25</sup> In all cases a high density of tesserae was used (NTSALL = 960 in \$TESCAV).

**Table S2.** Computed absorbance (top section) and emission (bottom section) energies vs. experimentally measured (eV). All calculations included water solvent effects via the Polarizable Continuum Model (PCM). Differences (computed – experimental) given in parentheses and mean unsigned errors (MUEs) shown at bottom of each section.

| System/Method            |                             | TDDFT-B3LYP-PCM | ORMAS-PT2-PCM  | Experiment         |
|--------------------------|-----------------------------|-----------------|----------------|--------------------|
| <b>Absorbance</b>        |                             |                 |                |                    |
| Trimethine indocyanine   | Parent                      | 2.631 (0.373)   | 2.409 (0.151)  | 2.258 <sup>a</sup> |
|                          | Conformationally restrained | 2.569 (0.347)   | 2.341 (0.119)  | 2.222 <sup>a</sup> |
| Pentamethine indocyanine | Parent                      | 2.334 (0.391)   | 2.088 (0.145)  | 1.943 <sup>b</sup> |
|                          | Conformationally restrained | 2.240 (0.367)   | 2.000 (0.127)  | 1.873 <sup>b</sup> |
| Heptamethine indocyanine | Parent                      | 2.089 (0.404)   | 1.849 (0.164)  | 1.685 <sup>c</sup> |
|                          | Conformationally restrained | 1.978 (0.378)   | 1.749 (0.149)  | 1.600 <sup>c</sup> |
| MUE                      |                             | 0.377           | 0.143          |                    |
| <b>Emission</b>          |                             |                 |                |                    |
| Trimethine indocyanine   | Parent                      | 2.174 (–0.028)  | 2.196 (–0.006) | 2.202 <sup>a</sup> |
|                          | Conformationally restrained | 2.156 (–0.008)  | 2.162 (–0.002) | 2.164 <sup>a</sup> |
| Pentamethine indocyanine | Parent                      | 1.939 (0.052)   | 1.969 (0.082)  | 1.887 <sup>b</sup> |
|                          | Conformationally restrained | 1.884 (0.053)   | 1.906 (0.075)  | 1.831 <sup>b</sup> |
| Heptamethine indocyanine | Parent                      | 1.725 (0.117)   | 1.780 (0.172)  | 1.608 <sup>c</sup> |
|                          | Conformationally restrained | 1.644 (0.084)   | 1.693 (0.133)  | 1.560 <sup>c</sup> |
| MUE                      |                             | 0.057           | 0.078          |                    |

<sup>a</sup> Klehs, K.; Spahn, C.; Endesfelder, U.; Lee, S. F.; Furstenberg, A.; Heilemann, M., Increasing the brightness of cyanine fluorophores for single-molecule and superresolution imaging. *Chemphyschem* **2014**, *15* (4), 637-41.

<sup>b</sup> Michie, M. S.; Gotz, R.; Franke, C.; Bowler, M.; Kumari, N.; Magidson, V.; Levitus, M.; Loncarek, J.; Sauer, M.; Schnermann, M. J., Cyanine Conformational Restraint in the Far-Red Range. *J Am Chem Soc* **2017**, *139* (36), 12406-12409.

<sup>c</sup> This work.

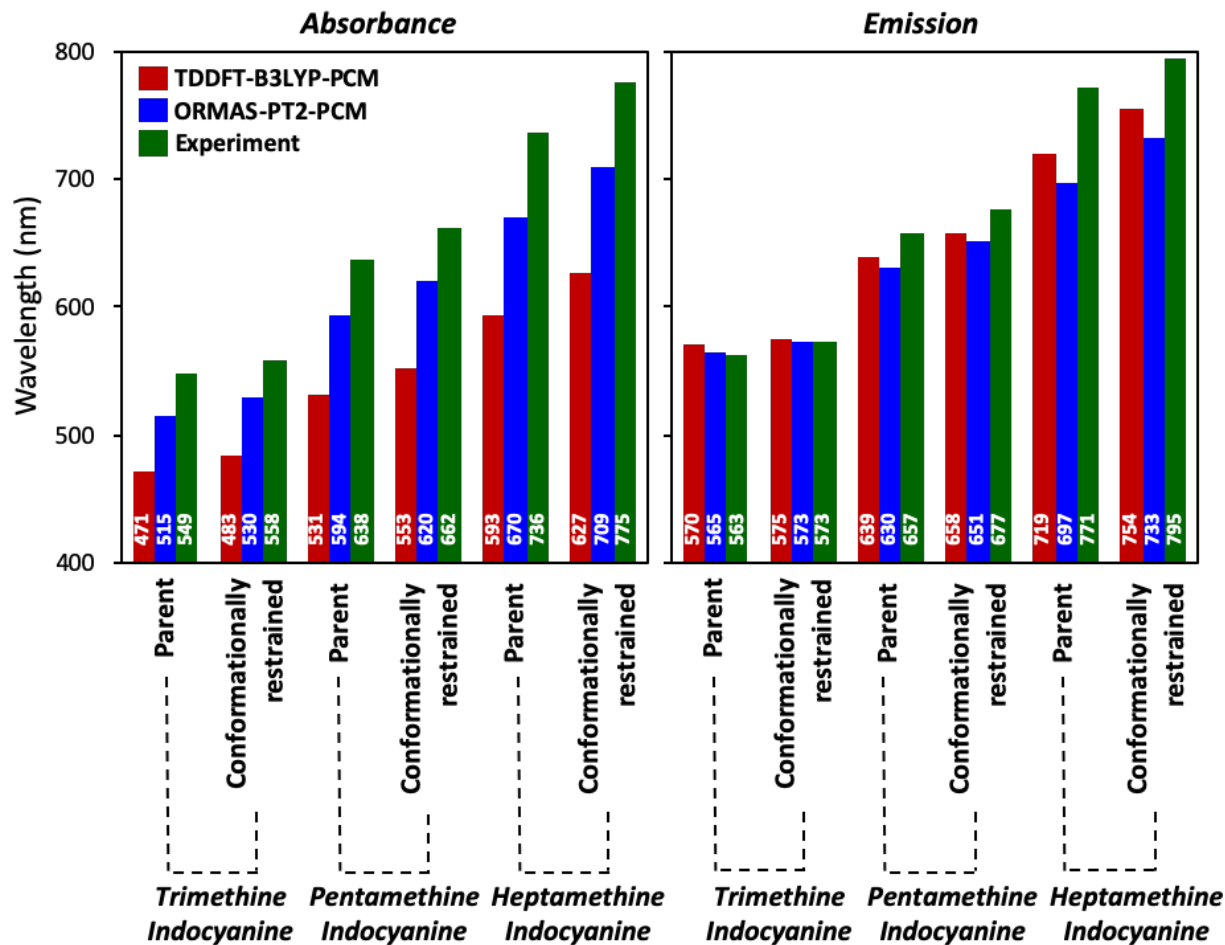

**Figure S6** Computed and experimental absorbance and emission energies (nm). See **Table S2** and **Sections S4** and **S5** for more details.

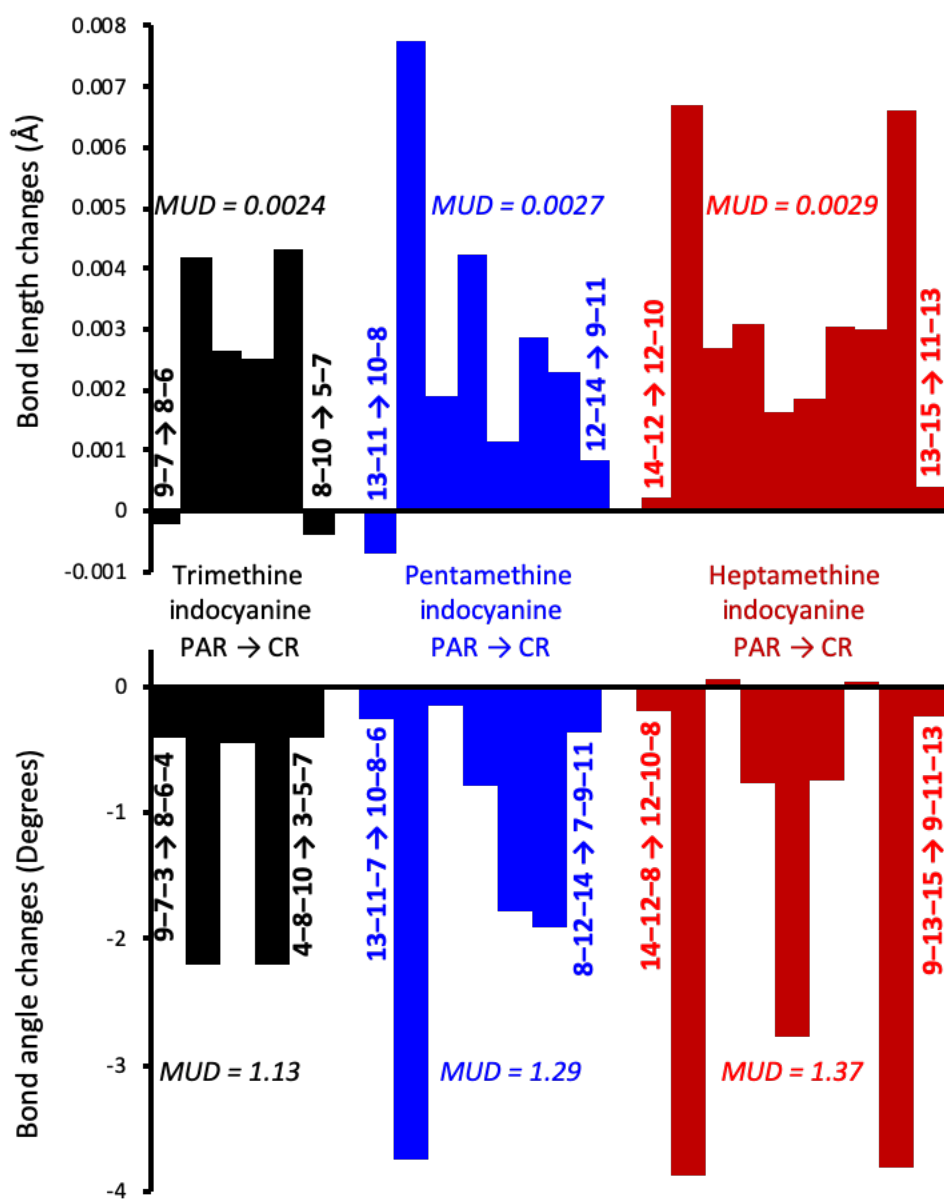

**Figure S7.** Chain bond length (top) and bond angle (bottom) changes when going from parent indocyanine to its conformationally restricted form. Parameter changes are determined sequentially for heavy atoms starting and ending at nitrogen atoms. Actual start/end bonds and angles are given where atom numberings correspond to the Cartesian coordinates (B3LYP-PCM/cc-pVTZ optimized geometries) provided in **Section S5**. Mean unsigned differences (MUDs) are also shown. **Note: PAR and CR stand for parent and conformationally restrained indocyanine variant.**

# Section S4. $^1\text{H}$ , $^{13}\text{C}$ and Associated 2D NMR Spectra

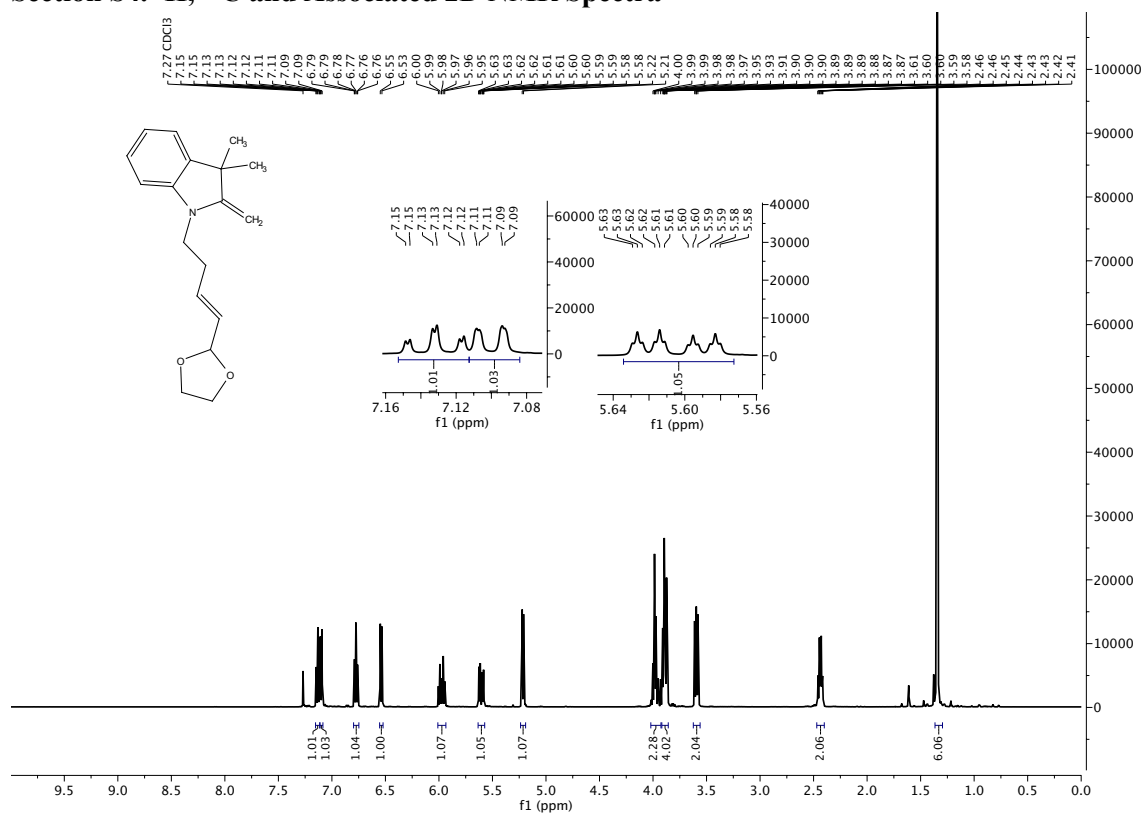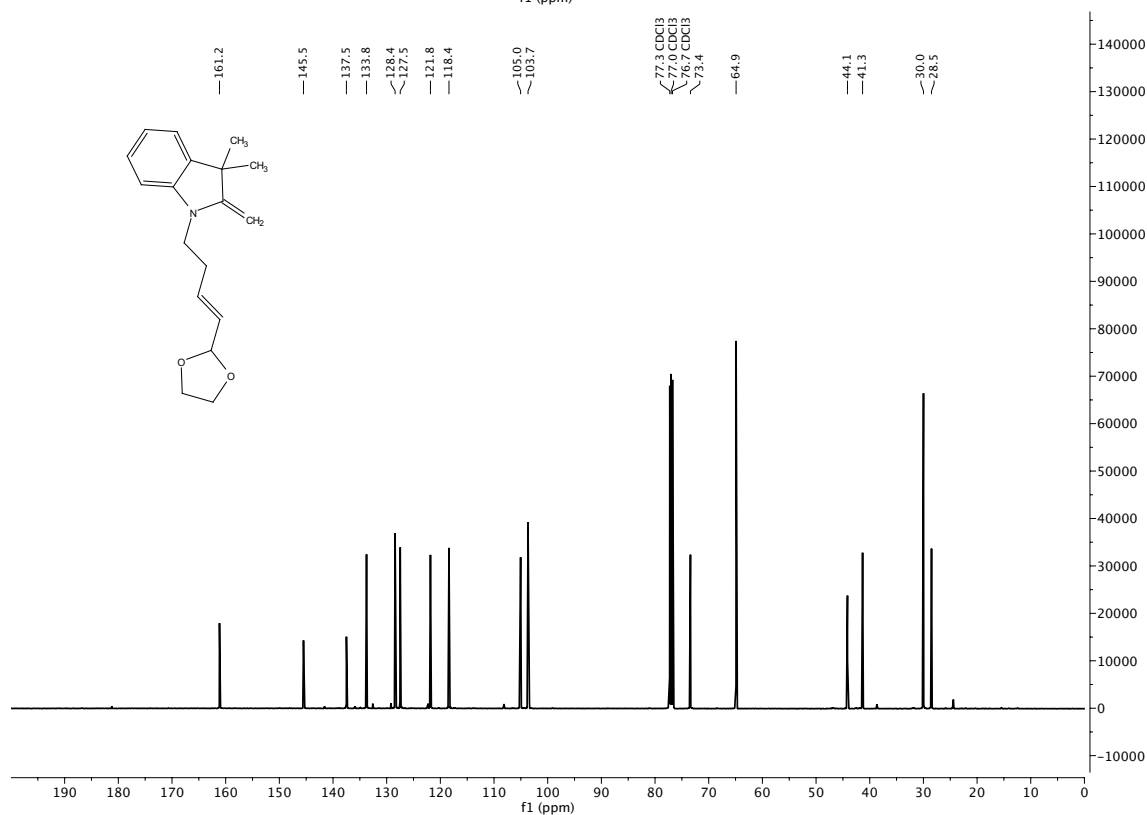

$^1\text{H}$  (500 MHz) and  $^{13}\text{C}$  (126 MHz) NMR spectra of **7**

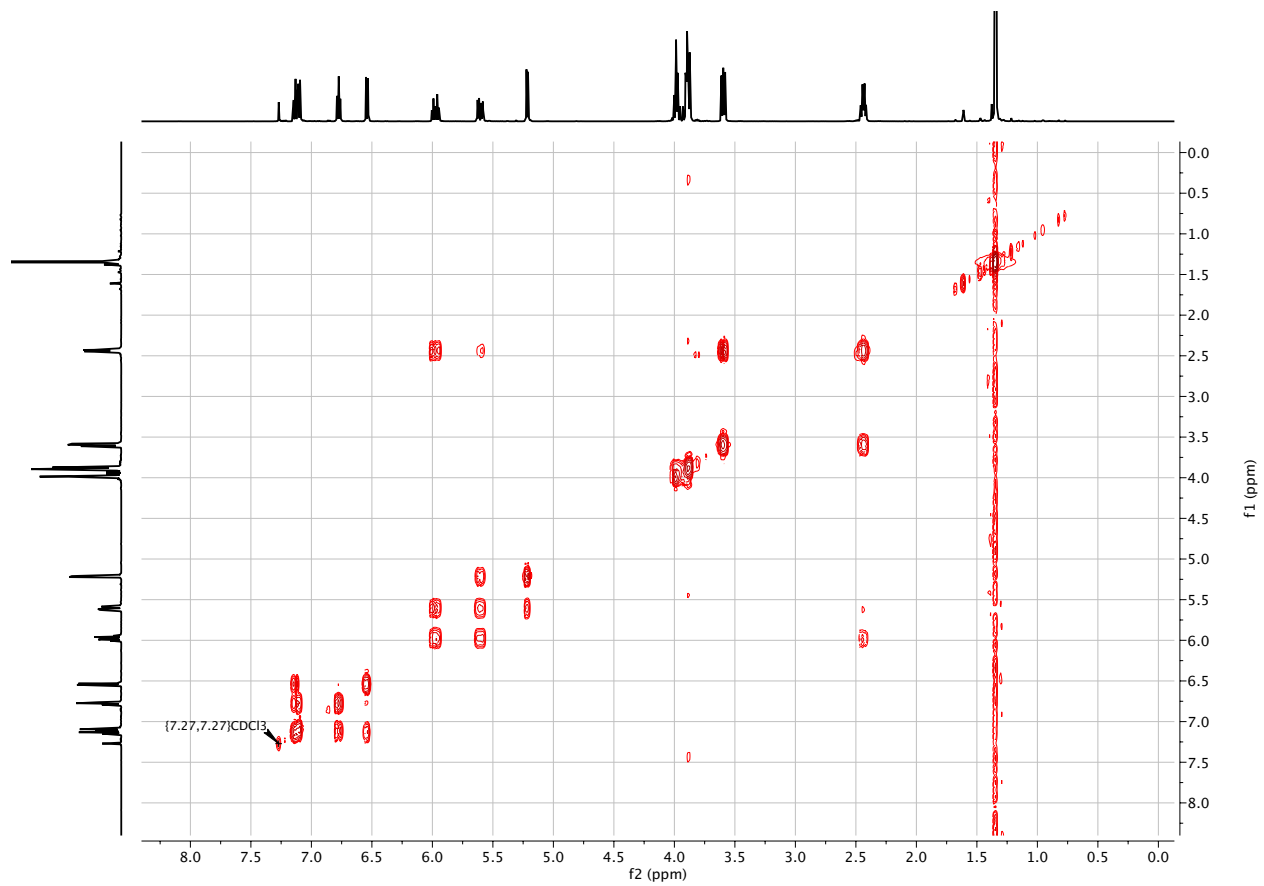

Gradient COSY NMR (500 MHz) spectra of 7

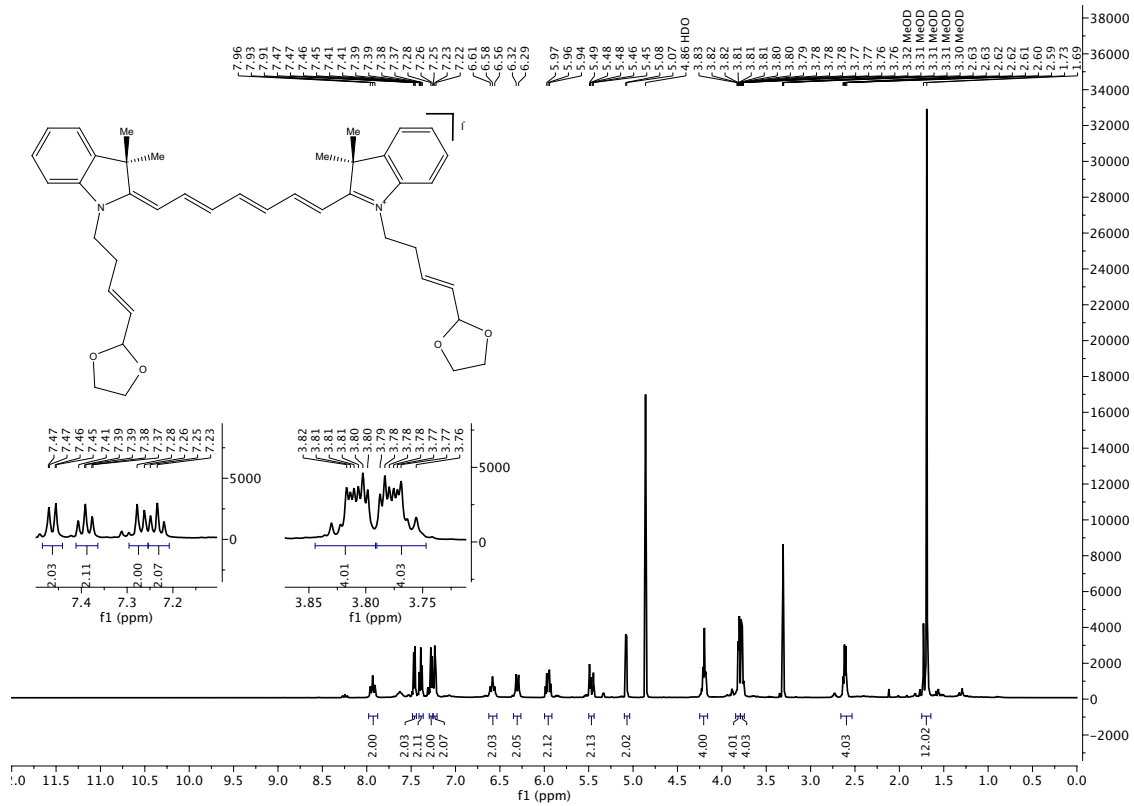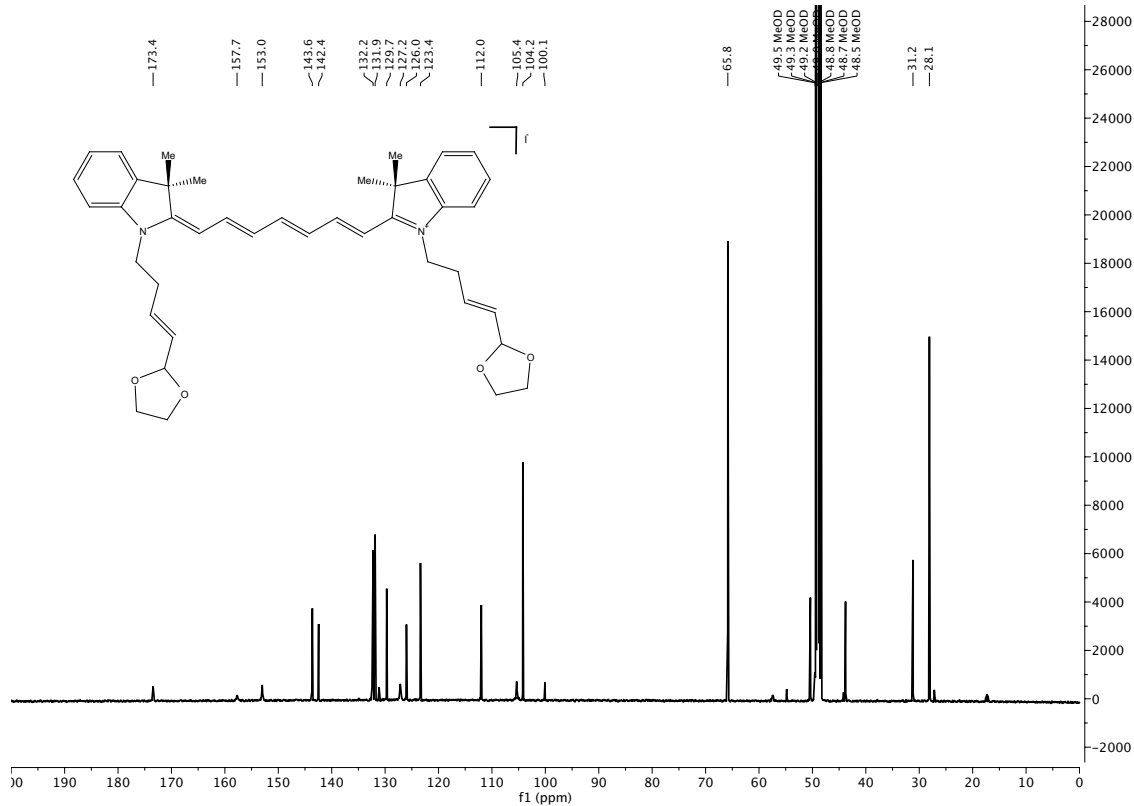

<sup>1</sup>H (500 MHz) and <sup>13</sup>C (126 MHz) NMR spectra of **3**

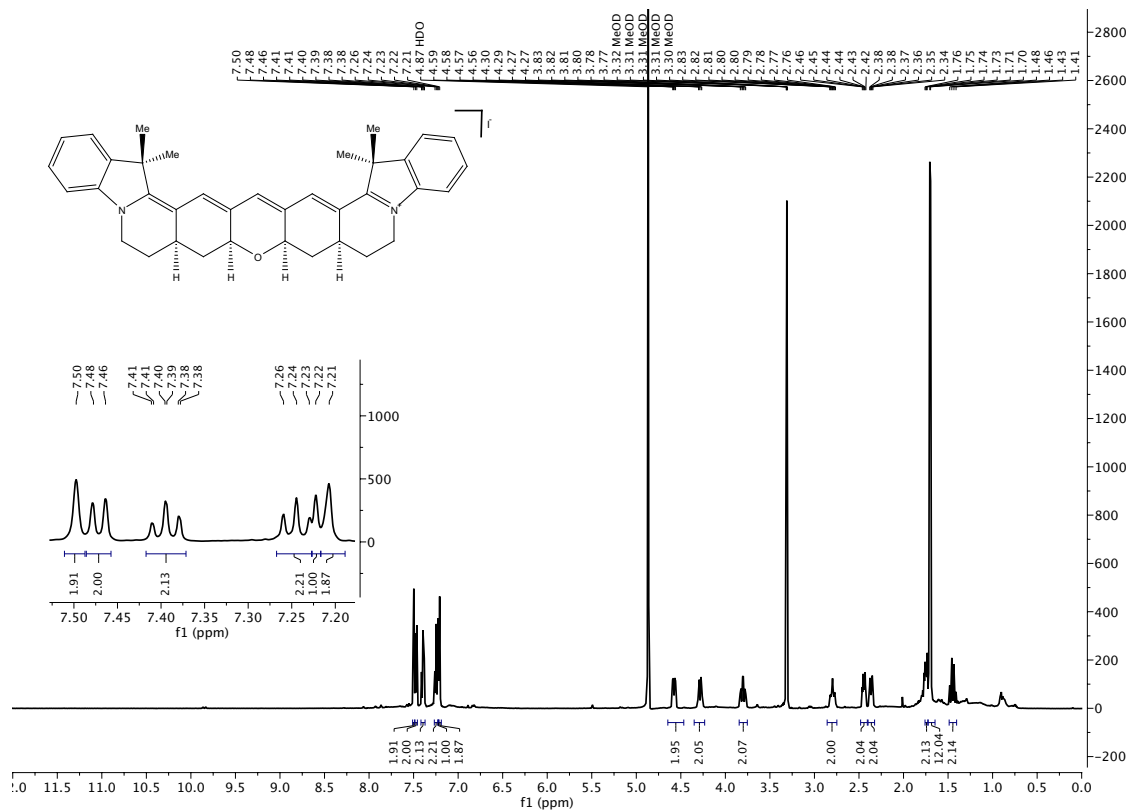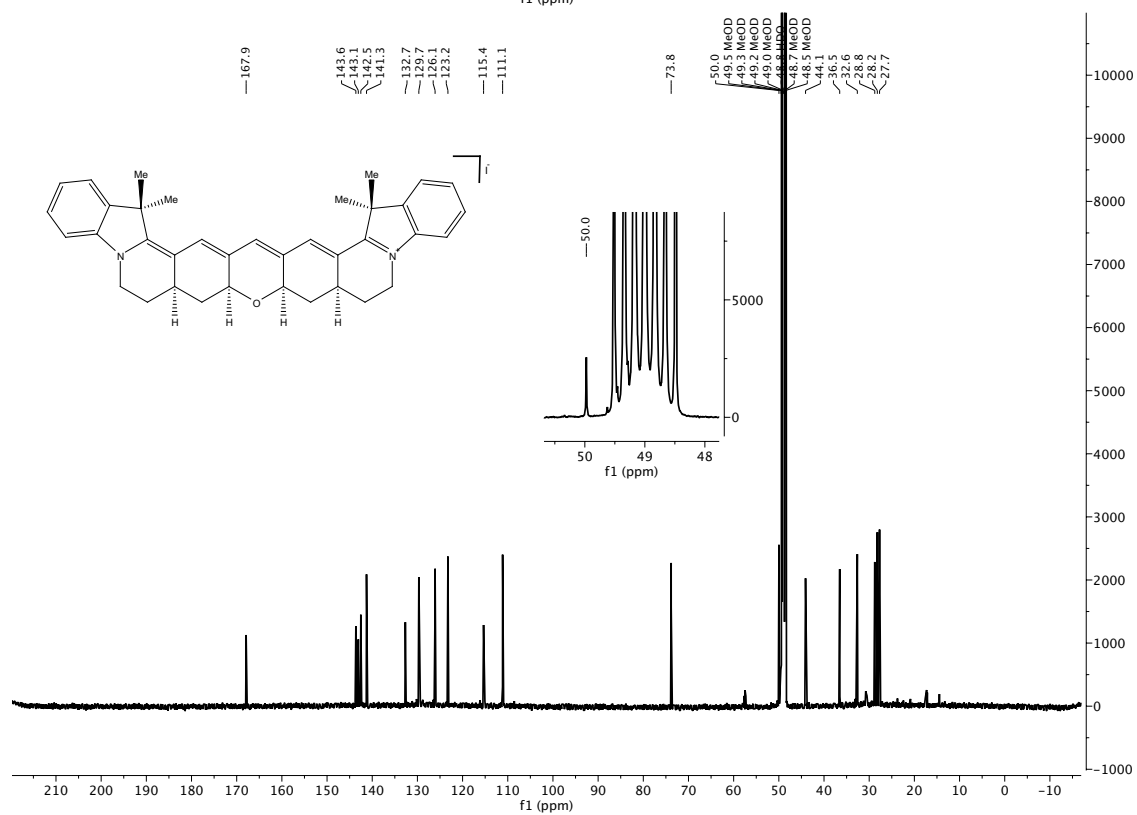

<sup>1</sup>H (500 MHz) and <sup>13</sup>C (126 MHz) NMR spectra of 2



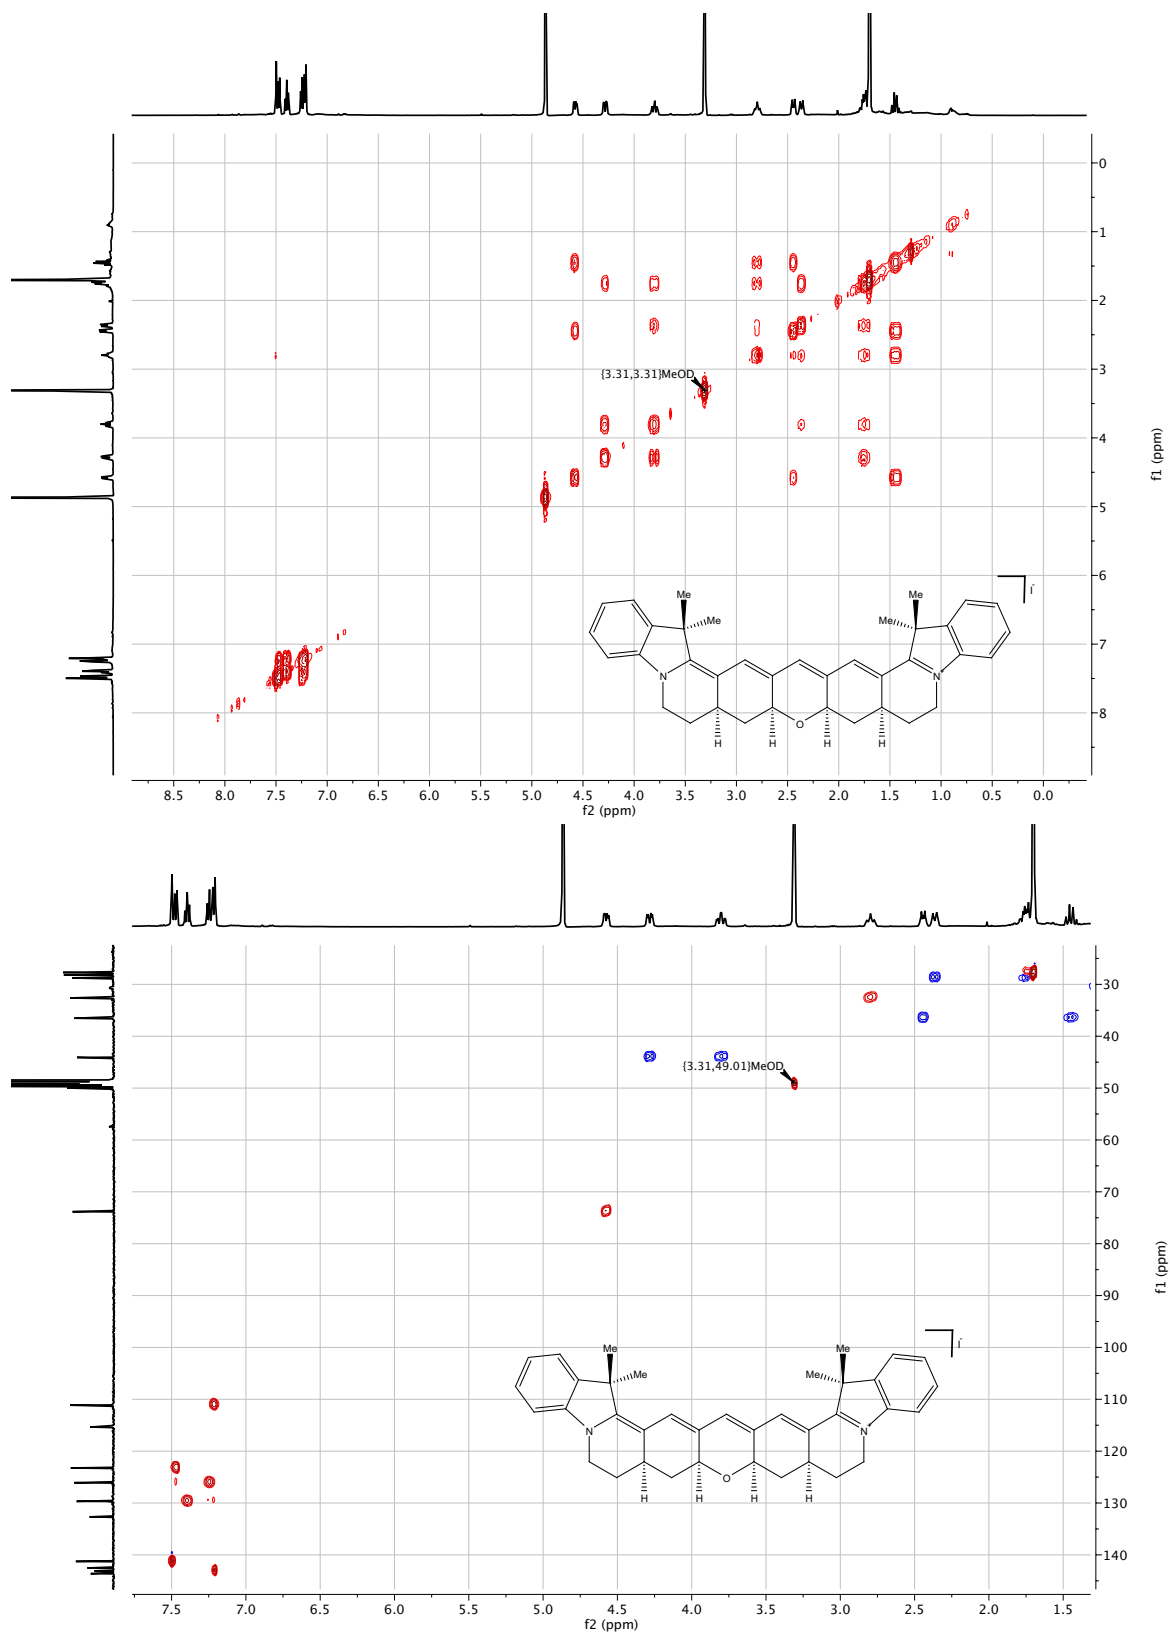

Gradient COSY (500 MHz) and HSQC (500, 126 MHz) NMR spectra of **2**

**Section S5. Raw B3LYP-PCM/cc-pVTZ and TDDFT-B3LYP-PCM/cc-pVTZ Results:** Energies (hartree), oscillator strengths, HOMO & LUMO energies (hartree), excitation/de-excitation amplitudes, and optimized structures (Å)

**Parent trimethine indocyanine: Results at B3LYP-PCM/cc-pVTZ ground state optimized structure (S0)**

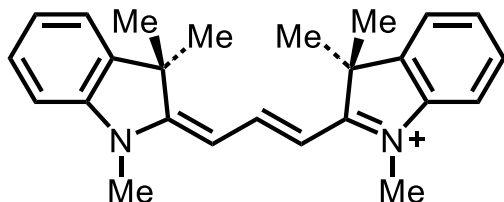

$E(S0) = -1079.159375$

$E(S1^*) = -1079.062671$

Oscillator strength = 1.5256

$E(\text{HOMO}) = -0.2054$ ;  $E(\text{LUMO}) = -0.1007$

| OCC | VIR | EXCITATION<br>AMPLITUDE | DE-EXCITATION<br>AMPLITUDE |
|-----|-----|-------------------------|----------------------------|
| I   | A   | X (I→A)                 | Y (A→I)                    |
| --- | --- | -----                   | -----                      |
| 92  | 97  | 0.058653                | 0.029934                   |
| 94  | 97  | -0.032767               | -0.006865                  |
| 96  | 97  | 0.997968                | -0.115547                  |
| 95  | 98  | 0.032897                | 0.003435                   |
| 95  | 100 | 0.070253                | 0.015352                   |
| 96  | 101 | -0.038280               | -0.013302                  |

COORDINATES OF ALL ATOMS ARE (ANGS)

| ATOM | CHARGE | X             | Y             | Z             |
|------|--------|---------------|---------------|---------------|
| C    | 6.0    | -0.0000684525 | -0.0014173993 | 0.5437554308  |
| H    | 1.0    | -0.0001057819 | -0.0015830899 | -0.5349613092 |
| C    | 6.0    | -1.2213305224 | 0.0052823679  | 1.2100361041  |
| C    | 6.0    | 1.2212813128  | -0.0077583006 | 1.2099076316  |
| H    | 1.0    | -1.1804789079 | 0.0039678481  | 2.2912525550  |
| H    | 1.0    | 1.1803386030  | -0.0063525535 | 2.2910967476  |
| C    | 6.0    | -2.4863972383 | 0.0119927247  | 0.6302058375  |
| C    | 6.0    | 2.4863698660  | -0.0134207220 | 0.6301788138  |
| N    | 7.0    | -3.6064798900 | 0.0288488932  | 1.3818235489  |
| N    | 7.0    | 3.6064126783  | -0.0293606146 | 1.3819818427  |
| C    | 6.0    | -3.6241552527 | 0.0512367595  | 2.8389559919  |
| C    | 6.0    | 3.6238203201  | -0.0528397607 | 2.8391130195  |
| H    | 1.0    | -4.6461698971 | 0.1588289611  | 3.1822052787  |
| H    | 1.0    | 4.6457246583  | -0.1606571733 | 3.1826051780  |
| H    | 1.0    | -3.2117028886 | -0.8746861794 | 3.2393515515  |
| H    | 1.0    | 3.0424350852  | -0.8965336996 | 3.2074551754  |
| H    | 1.0    | -3.0427024749 | 0.8945237672  | 3.2081965383  |
| H    | 1.0    | 3.2112669902  | 0.8727548114  | 3.2401538068  |
| C    | 6.0    | -4.7691985431 | 0.0150380579  | 0.5844667889  |

|   |     |               |               |               |
|---|-----|---------------|---------------|---------------|
| C | 6.0 | 4.7691837665  | -0.0135907896 | 0.5847567756  |
| C | 6.0 | -6.0988624543 | 0.0141573643  | 0.9797806717  |
| C | 6.0 | 6.0988167643  | -0.0107169735 | 0.9802184785  |
| H | 1.0 | -6.3911753916 | 0.0213888230  | 2.0193183536  |
| H | 1.0 | 6.3909348689  | -0.0175610476 | 2.0197988666  |
| C | 6.0 | -7.0652170506 | 0.0001372558  | -0.0253780537 |
| C | 6.0 | 7.0652943322  | 0.0047530093  | -0.0247985915 |
| H | 1.0 | -8.1112168133 | -0.0012325446 | 0.2496899191  |
| H | 1.0 | 8.1112620145  | 0.0076662897  | 0.2504356785  |
| C | 6.0 | -6.7057762218 | -0.0131518645 | -1.3704979250 |
| C | 6.0 | 6.7059847219  | 0.0175664060  | -1.3699510816 |
| H | 1.0 | -7.4737897300 | -0.0240255265 | -2.1317924065 |
| H | 1.0 | 7.4740792315  | 0.0295491399  | -2.1311467250 |
| C | 6.0 | -5.3597420295 | -0.0140986547 | -1.7436532273 |
| C | 6.0 | 5.3599900364  | 0.0166400027  | -1.7433147855 |
| H | 1.0 | -5.0871064895 | -0.0260079076 | -2.7908792333 |
| H | 1.0 | 5.0875569215  | 0.0281960209  | -2.7905967148 |
| C | 6.0 | -4.3933865962 | -0.0008605622 | -0.7552764438 |
| C | 6.0 | 4.3935277372  | 0.0019894802  | -0.7550463831 |
| C | 6.0 | -2.8804268792 | -0.0016838576 | -0.8530477504 |
| C | 6.0 | 2.8805877873  | 0.0009670136  | -0.8529963413 |
| C | 6.0 | 2.3898215034  | 1.2815892558  | -1.5612844499 |
| C | 6.0 | -2.3905387055 | 1.2673112140  | -1.5833121630 |
| C | 6.0 | 2.3922066822  | -1.2685671650 | -1.5833196136 |
| C | 6.0 | -2.3908824950 | -1.2827166686 | -1.5614718914 |
| H | 1.0 | 2.7244280875  | 2.1740425394  | -1.0334177025 |
| H | 1.0 | -2.7267479192 | 2.1685106731  | -1.0715725149 |
| H | 1.0 | 2.7284319746  | -2.1693456195 | -1.0708244421 |
| H | 1.0 | -2.7269951414 | -2.1749821256 | -1.0342551391 |
| H | 1.0 | 2.7911056257  | 1.3125363323  | -2.5739894286 |
| H | 1.0 | -2.7909581133 | 1.2800437988  | -2.5967846542 |
| H | 1.0 | 2.7936627850  | -1.2815152567 | -2.5963742181 |
| H | 1.0 | -2.7915100967 | -1.3127663526 | -2.5744651749 |
| H | 1.0 | 1.3043296435  | 1.3139070031  | -1.6300157273 |
| H | 1.0 | -1.3049726083 | 1.2997605765  | -1.6514050571 |
| H | 1.0 | 1.3067201075  | -1.3015881361 | -1.6525553108 |
| H | 1.0 | -1.3053799214 | -1.3164872337 | -1.6293693653 |

**Parent trimethine indocyanine: Results at TDDFT-B3LYP-PCM/cc-pVTZ excited state optimized structure (S1)**

$E(S0^*) = -1079.155002$

$E(S1) = -1079.075124$

Oscillator strength = 1.7383

$E(\text{HOMO}) = -0.2044$ ;  $E(\text{LUMO}) = -0.1089$

| OCC | VIR | EXCITATION<br>AMPLITUDE | DE-EXCITATION<br>AMPLITUDE |
|-----|-----|-------------------------|----------------------------|
| I   | A   | X (I->A)                | Y (A->I)                   |
| --- | --- | -----                   | -----                      |
| 96  | 97  | -0.997532               | 0.074585                   |
| 95  | 98  | 0.041540                | 0.006847                   |
| 95  | 100 | 0.058083                | 0.017526                   |

COORDINATES OF ALL ATOMS ARE (ANGS)

| ATOM  | CHARGE | X             | Y             | Z             |
|-------|--------|---------------|---------------|---------------|
| ----- | -----  | -----         | -----         | -----         |
| C     | 6.0    | -0.0000170437 | -0.0013478253 | 0.4336801011  |
| H     | 1.0    | -0.0000643937 | -0.0019220581 | -0.6437512971 |
| C     | 6.0    | -1.2249070556 | 0.0052594896  | 1.1213064747  |
| C     | 6.0    | 1.2247951050  | -0.0070368645 | 1.1214459491  |
| H     | 1.0    | -1.1570382597 | 0.0082658542  | 2.2025410648  |
| H     | 1.0    | 1.1565885822  | -0.0091983471 | 2.2026362105  |
| C     | 6.0    | -2.5001225600 | 0.0082719662  | 0.5817197163  |
| C     | 6.0    | 2.5001540330  | -0.0095896890 | 0.5821451981  |
| N     | 7.0    | -3.6274159241 | 0.0206264633  | 1.3867462375  |
| N     | 7.0    | 3.6274254773  | -0.0208542423 | 1.3872995450  |
| C     | 6.0    | -3.5881812212 | 0.0368561568  | 2.8380991029  |
| C     | 6.0    | 3.5880409185  | -0.0379800590 | 2.8386498340  |
| H     | 1.0    | -4.5977873864 | 0.0788433825  | 3.2298206856  |
| H     | 1.0    | 4.5972879895  | -0.0867461301 | 3.2304547011  |
| H     | 1.0    | -3.1018057162 | -0.8639083894 | 3.2158289751  |
| H     | 1.0    | 3.0334457067  | -0.9084779108 | 3.1907685205  |
| H     | 1.0    | -3.0392451369 | 0.9105518468  | 3.1913197527  |
| H     | 1.0    | 3.1070433047  | 0.8654173556  | 3.2171996695  |
| C     | 6.0    | -4.7821611699 | 0.0136701494  | 0.6375429993  |
| C     | 6.0    | 4.7822183460  | -0.0118888709 | 0.6381466000  |
| C     | 6.0    | -6.1158575063 | 0.0171499685  | 1.0647078378  |
| C     | 6.0    | 6.1160368584  | -0.0128405090 | 1.0651121643  |
| H     | 1.0    | -6.3805927752 | 0.0249983317  | 2.1114674199  |
| H     | 1.0    | 6.3811483055  | -0.0196599210 | 2.1117756914  |
| C     | 6.0    | -7.1010375146 | 0.0083607843  | 0.0890352396  |
| C     | 6.0    | 7.1010440105  | -0.0028124150 | 0.0892180662  |
| H     | 1.0    | -8.1403365091 | 0.0105636124  | 0.3883079164  |
| H     | 1.0    | 8.1404533050  | -0.0030776952 | 0.3882092989  |
| C     | 6.0    | -6.7776321240 | -0.0037507318 | -1.2726668436 |
| C     | 6.0    | 6.7775579300  | 0.0082149151  | -1.2724883428 |
| H     | 1.0    | -7.5679412956 | -0.0103698123 | -2.0106677191 |
| H     | 1.0    | 7.5677237773  | 0.0158485062  | -2.0106357347 |

|   |     |               |               |               |
|---|-----|---------------|---------------|---------------|
| C | 6.0 | -5.4417179487 | -0.0079509368 | -1.6847343911 |
| C | 6.0 | 5.4415882063  | 0.0101866450  | -1.6842995010 |
| H | 1.0 | -5.2014851088 | -0.0178561231 | -2.7399340597 |
| H | 1.0 | 5.2008652087  | 0.0194056491  | -2.7393653747 |
| C | 6.0 | -4.4470060149 | 0.0004164370  | -0.7302664172 |
| C | 6.0 | 4.4470688883  | 0.0006193877  | -0.7296616993 |
| C | 6.0 | -2.9402739720 | -0.0022551274 | -0.8805264392 |
| C | 6.0 | 2.9404074679  | 0.0011181328  | -0.8799766972 |
| C | 6.0 | 2.4739513197  | 1.2777325014  | -1.6199768820 |
| C | 6.0 | -2.4729545527 | 1.2635441913  | -1.6388394812 |
| C | 6.0 | 2.4749415780  | -1.2657550904 | -1.6375857370 |
| C | 6.0 | -2.4751605163 | -1.2795473182 | -1.6202757201 |
| H | 1.0 | 2.7999838501  | 2.1746854837  | -1.0944657719 |
| H | 1.0 | -2.7979617365 | 2.1683478839  | -1.1263491763 |
| H | 1.0 | 2.8012063073  | -2.1696564008 | -1.1242601866 |
| H | 1.0 | -2.8019195055 | -2.1761935604 | -1.0947253517 |
| H | 1.0 | 2.8972700855  | 1.2948020299  | -2.6244713896 |
| H | 1.0 | -2.8965926116 | 1.2663724158  | -2.6433490598 |
| H | 1.0 | 2.8987726997  | -1.2687892818 | -2.6420149821 |
| H | 1.0 | -2.8985256521 | -1.2963606025 | -2.6247580649 |
| H | 1.0 | 1.3900405646  | 1.3113199913  | -1.7119431795 |
| H | 1.0 | -1.3889992428 | 1.2947397452  | -1.7315271296 |
| H | 1.0 | 1.3910496557  | -1.2985883011 | -1.7304016282 |
| H | 1.0 | -1.3912694289 | -1.3140964529 | -1.7122799542 |

*Conformationally restrained trimethine indocyanine: Results at B3LYP-PCM/cc-pVTZ ground state optimized structure (S0)*

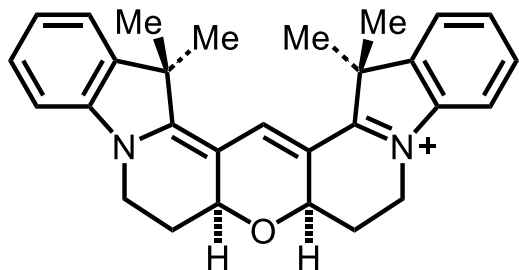

$E(S0) = -1307.970228$

$E(S1^*) = -1307.875813$

Oscillator strength = 1.4037

$E(\text{HOMO}) = -0.2019$ ;  $E(\text{LUMO}) = -0.0997$

| OCC | VIR | EXCITATION | DE-EXCITATION |
|-----|-----|------------|---------------|
| I   | A   | AMPLITUDE  | AMPLITUDE     |
| --- | --- | X (I->A)   | Y (A->I)      |
| 109 | 114 | 0.050956   | 0.026607      |
| 111 | 114 | -0.032421  | -0.007895     |
| 113 | 114 | -0.998524  | 0.119593      |
| 112 | 115 | 0.036306   | 0.005004      |
| 112 | 117 | 0.068714   | 0.016515      |
| 113 | 118 | -0.037710  | -0.014603     |

COORDINATES OF ALL ATOMS ARE (ANGS)

| ATOM | CHARGE | X             | Y             | Z             |
|------|--------|---------------|---------------|---------------|
| C    | 6.0    | 0.0008106668  | -0.0107380756 | 0.6218213552  |
| H    | 1.0    | 0.0007276623  | -0.0674928641 | -0.4532265962 |
| C    | 6.0    | -1.2201248229 | 0.0128087081  | 1.2935819257  |
| C    | 6.0    | 1.2219682783  | 0.0161125419  | 1.2933062996  |
| C    | 6.0    | -2.4682380464 | -0.0200456565 | 0.6693411824  |
| C    | 6.0    | 2.4698710635  | -0.0178243013 | 0.6689033331  |
| N    | 7.0    | -3.6075307948 | -0.0464328953 | 1.3906239478  |
| N    | 7.0    | 3.6095468774  | -0.0367477412 | 1.3900306869  |
| C    | 6.0    | -4.7499797362 | -0.0159648364 | 0.5728235563  |
| C    | 6.0    | 4.7516786874  | -0.0124645238 | 0.5716761834  |
| C    | 6.0    | -6.0837850454 | -0.0047012320 | 0.9520992187  |
| C    | 6.0    | 6.0856724412  | 0.0022569238  | 0.9502428916  |
| H    | 1.0    | -6.3848297712 | -0.0125191722 | 1.9894730216  |
| H    | 1.0    | 6.3870655751  | 0.0034258354  | 1.9875282239  |
| C    | 6.0    | -7.0339524192 | 0.0235990090  | -0.0682778992 |
| C    | 6.0    | 7.0355050704  | 0.0214547873  | -0.0706302480 |
| H    | 1.0    | -8.0845235054 | 0.0340742275  | 0.1886841709  |
| H    | 1.0    | 8.0861416863  | 0.0339928294  | 0.1860142387  |
| C    | 6.0    | -6.6512174291 | 0.0407183364  | -1.4070294565 |
| C    | 6.0    | 6.6523055265  | 0.0269273338  | -1.4093255612 |

|   |     |               |               |               |
|---|-----|---------------|---------------|---------------|
| H | 1.0 | -7.4070118062 | 0.0628522927  | -2.1802340023 |
| H | 1.0 | 7.4078132686  | 0.0421940501  | -2.1829761338 |
| C | 6.0 | -5.2991057932 | 0.0323760670  | -1.7614113505 |
| C | 6.0 | 5.3000398440  | 0.0156108322  | -1.7631318076 |
| H | 1.0 | -5.0123282200 | 0.0478082976  | -2.8047522366 |
| H | 1.0 | 5.0130535420  | 0.0218682496  | -2.8065211023 |
| C | 6.0 | -4.3481027145 | 0.0065869101  | -0.7585269230 |
| C | 6.0 | 4.3493558768  | -0.0016478261 | -0.7597295891 |
| C | 6.0 | -2.8313599081 | -0.0057370136 | -0.8255837006 |
| C | 6.0 | 2.8325861997  | -0.0145099514 | -0.8262354216 |
| C | 6.0 | 2.3201822154  | 1.2552150785  | -1.5372647440 |
| C | 6.0 | -2.3184563718 | 1.2684363349  | -1.5279765314 |
| C | 6.0 | 2.3448705493  | -1.2958404179 | -1.5365210805 |
| C | 6.0 | -2.3444127067 | -1.2824710322 | -1.5449152718 |
| H | 1.0 | 2.6558937673  | 2.1550646722  | -1.0228722765 |
| H | 1.0 | -2.6548984118 | 2.1649995870  | -1.0083649693 |
| H | 1.0 | 2.6917932309  | -2.1881981841 | -1.0165360378 |
| H | 1.0 | -2.6923543106 | -2.1782727227 | -1.0315974842 |
| H | 1.0 | 2.7055348084  | 1.2802457785  | -2.5563326682 |
| H | 1.0 | -2.7025933803 | 1.2997077704  | -2.5473234226 |
| H | 1.0 | 2.7377931294  | -1.3180771366 | -2.5527865730 |
| H | 1.0 | -2.7370039345 | -1.2969884764 | -2.5614530416 |
| H | 1.0 | 1.2337225274  | 1.2790182710  | -1.5895801859 |
| H | 1.0 | -1.2319349731 | 1.2927556193  | -1.5786905166 |
| H | 1.0 | 1.2593233533  | -1.3374885243 | -1.5967618444 |
| H | 1.0 | -1.2589020571 | -1.3248329386 | -1.6050904688 |
| C | 6.0 | 3.6667448204  | -0.0705022893 | 2.8527279692  |
| C | 6.0 | 1.1820896095  | 0.0650596457  | 2.8127100954  |
| C | 6.0 | -1.1817908599 | 0.0561375925  | 2.8131930081  |
| C | 6.0 | -3.6656620289 | -0.0982231425 | 2.8527373019  |
| C | 6.0 | -2.3734581738 | -0.6695359988 | 3.4124565648  |
| C | 6.0 | 2.3791070500  | -0.6471382542 | 3.4172650744  |
| O | 8.0 | 0.0024557705  | -0.5624607965 | 3.3022922402  |
| H | 1.0 | 4.5181509830  | -0.6827899132 | 3.1422004103  |
| H | 1.0 | 3.8443285070  | 0.9433458951  | 3.2187943635  |
| H | 1.0 | 2.3121619718  | -1.7118999736 | 3.1875449988  |
| H | 1.0 | 2.3774133893  | -0.5342114144 | 4.5002940675  |
| H | 1.0 | 1.1817126691  | 1.1137170703  | 3.1424362221  |
| H | 1.0 | -4.5116233364 | -0.7221322504 | 3.1335034564  |
| H | 1.0 | -3.8538375105 | 0.9091059810  | 3.2310794915  |
| H | 1.0 | -2.2985221071 | -1.7319317359 | 3.1745165924  |
| H | 1.0 | -2.3725289985 | -0.5649234554 | 4.4963229334  |
| H | 1.0 | -1.1919470643 | 1.1035072682  | 3.1470932198  |

**Conformationally restrained trimethine indocyanine: Results at TDDFT-B3LYP-PCM/cc-pVTZ excited state optimized structure (S1)**

$E(S0) = -1307.966380$

$E(S1^*) = -1307.887155$

Oscillator strength = 1.6829

$E(\text{HOMO}) = -0.2016$ ;  $E(\text{LUMO}) = -0.1074$

| OCC | VIR | EXCITATION | DE-EXCITATION |
|-----|-----|------------|---------------|
| I   | A   | AMPLITUDE  | AMPLITUDE     |
| --- | --- | X (I->A)   | Y (A->I)      |
| 109 | 114 | 0.030230   | 0.024942      |
| 113 | 114 | 0.997402   | -0.080329     |
| 112 | 115 | 0.048019   | 0.009636      |
| 112 | 117 | 0.056938   | 0.018323      |
| 113 | 118 | 0.032026   | 0.013626      |

COORDINATES OF ALL ATOMS ARE (ANGS)

| ATOM | CHARGE | X             | Y             | Z             |
|------|--------|---------------|---------------|---------------|
| C    | 6.0    | 0.0006325837  | -0.0474689805 | 0.5735377051  |
| H    | 1.0    | 0.0005268395  | -0.1047959473 | -0.5004031812 |
| C    | 6.0    | -1.2306472016 | -0.0180618836 | 1.2547626690  |
| C    | 6.0    | 1.2319212892  | -0.0217372085 | 1.2543797645  |
| C    | 6.0    | -2.4836062289 | -0.0292438090 | 0.6465482498  |
| C    | 6.0    | 2.4849050614  | -0.0320391010 | 0.6458104997  |
| N    | 7.0    | -3.6410660369 | -0.0400015807 | 1.4012567361  |
| N    | 7.0    | 3.6423495614  | -0.0502444537 | 1.4002399437  |
| C    | 6.0    | -4.7664440698 | -0.0064480344 | 0.6136592775  |
| C    | 6.0    | 4.7676148213  | -0.0099105440 | 0.6127293757  |
| C    | 6.0    | -6.1097595265 | 0.0178000515  | 1.0041991664  |
| C    | 6.0    | 6.1109041407  | 0.0115535979  | 1.0034403619  |
| H    | 1.0    | -6.3997558860 | 0.0218479447  | 2.0445892021  |
| H    | 1.0    | 6.4006282537  | 0.0068295663  | 2.0438839241  |
| C    | 6.0    | -7.0639070912 | 0.0436084262  | -0.0026820740 |
| C    | 6.0    | 7.0651006961  | 0.0464008094  | -0.0031291489 |
| H    | 1.0    | -8.1123654906 | 0.0632821160  | 0.2623506693  |
| H    | 1.0    | 8.1135187564  | 0.0645010535  | 0.2622345787  |
| C    | 6.0    | -6.6960412910 | 0.0480584207  | -1.3525151381 |
| C    | 6.0    | 6.6971859169  | 0.0619794069  | -1.3528323672 |
| H    | 1.0    | -7.4623968216 | 0.0690776567  | -2.1151449236 |
| H    | 1.0    | 7.4635399082  | 0.0898297741  | -2.1152547655 |
| C    | 6.0    | -5.3473968670 | 0.0286221013  | -1.7245766463 |
| C    | 6.0    | 5.3485311840  | 0.0450608705  | -1.7251131014 |
| H    | 1.0    | -5.0759564257 | 0.0346990384  | -2.7721131611 |
| H    | 1.0    | 5.0772274296  | 0.0597800201  | -2.7725982499 |
| C    | 6.0    | -4.3829212420 | 0.0037361687  | -0.7393057162 |
| C    | 6.0    | 4.3840459278  | 0.0117529233  | -0.7400339958 |
| C    | 6.0    | -2.8694938759 | -0.0214891436 | -0.8341980391 |
| C    | 6.0    | 2.8706009452  | -0.0128966387 | -0.8348673060 |



|   |     |               |               |               |
|---|-----|---------------|---------------|---------------|
| C | 6.0 | 2.3586513087  | 1.2557694337  | -1.5571105533 |
| C | 6.0 | -2.3579234484 | 1.2416440572  | -1.5665300324 |
| C | 6.0 | 2.4059523158  | -1.2886648701 | -1.5791682678 |
| C | 6.0 | -2.4045140088 | -1.3027826446 | -1.5686229087 |
| H | 1.0 | 2.6841275454  | 2.1577182333  | -1.0399933650 |
| H | 1.0 | -2.6826461458 | 2.1476468903  | -1.0561043107 |
| H | 1.0 | 2.7556111082  | -2.1864231733 | -1.0705635108 |
| H | 1.0 | -2.7555752765 | -2.1966894201 | -1.0542613412 |
| H | 1.0 | 2.7522869583  | 1.2814004121  | -2.5733707861 |
| H | 1.0 | -2.7524704256 | 1.2596064903  | -2.5826070482 |
| H | 1.0 | 2.8098655959  | -1.2883174588 | -2.5917939093 |
| H | 1.0 | -2.8067154012 | -1.3093928573 | -2.5819106098 |
| H | 1.0 | 1.2723254189  | 1.2709299621  | -1.6175712857 |
| H | 1.0 | -1.2716589293 | 1.2561370730  | -1.6281798020 |
| H | 1.0 | 1.3212878820  | -1.3379292486 | -1.6512645142 |
| H | 1.0 | -1.3197693619 | -1.3532695931 | -1.6383867990 |
| C | 6.0 | 3.6630506551  | -0.0728201563 | 2.8597027206  |
| C | 6.0 | 1.1802685629  | 0.0189000881  | 2.7717193909  |
| C | 6.0 | -1.1770819635 | 0.0274470305  | 2.7719420218  |
| C | 6.0 | -3.6602933138 | -0.0469417939 | 2.8608448825  |
| C | 6.0 | -2.3773469079 | -0.6600496476 | 3.3982139827  |
| C | 6.0 | 2.3760575875  | -0.6810906338 | 3.3928995618  |
| O | 8.0 | -0.0005113631 | -0.6074823054 | 3.2539885688  |
| H | 1.0 | 4.5264295826  | -0.6509516351 | 3.1825766908  |
| H | 1.0 | 3.7904423294  | 0.9503273502  | 3.2267260669  |
| H | 1.0 | 2.3326713472  | -1.7451961290 | 3.1547255342  |
| H | 1.0 | 2.3492102289  | -0.5749253601 | 4.4763364986  |
| H | 1.0 | 1.1731924112  | 1.0719311533  | 3.0939286725  |
| H | 1.0 | -4.5279416409 | -0.6143337275 | 3.1909756357  |
| H | 1.0 | -3.7785401358 | 0.9812830231  | 3.2166575476  |
| H | 1.0 | -2.3412657118 | -1.7260779733 | 3.1674529885  |
| H | 1.0 | -2.3495014578 | -0.5465702524 | 4.4808953665  |
| H | 1.0 | -1.1597462260 | 1.0813241116  | 3.0906577044  |

**Parent pentamethine indocyanine: Results at B3LYP-PCM/cc-pVTZ ground state optimized structure (S0)**

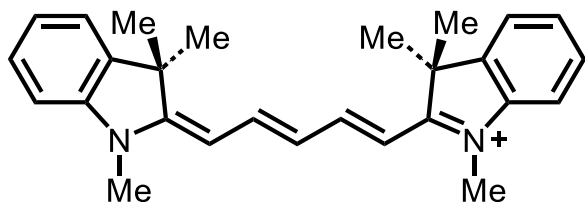

$E(S0) = -1156.545039$

$E(S1^*) = -1156.459258$

Oscillator strength = 2.1258

$E(\text{HOMO}) = -0.1964$ ;  $E(\text{LUMO}) = -0.1061$

| OCC | VIR | EXCITATION<br>AMPLITUDE | DE-EXCITATION<br>AMPLITUDE |
|-----|-----|-------------------------|----------------------------|
| I   | A   | X (I→A)                 | Y (A→I)                    |
| --- | --- | -----                   | -----                      |
| 99  | 104 | -0.048927               | -0.024463                  |
| 101 | 104 | 0.048157                | 0.017417                   |
| 103 | 104 | -0.999937               | 0.138223                   |
| 102 | 105 | 0.087839                | 0.018601                   |
| 102 | 107 | -0.038183               | -0.011681                  |
| 103 | 108 | -0.038352               | -0.014346                  |

COORDINATES OF ALL ATOMS ARE (ANGS)

| ATOM  | CHARGE | X             | Y             | Z             |
|-------|--------|---------------|---------------|---------------|
| ----- |        |               |               |               |
| C     | 6.0    | 0.0000245496  | 0.0000083120  | -1.2096624519 |
| H     | 1.0    | -0.0000517985 | 0.0000115479  | -2.2951531647 |
| C     | 6.0    | -1.2202450956 | 0.0000129316  | -0.5448297365 |
| C     | 6.0    | 1.2204355744  | -0.0000022047 | -0.5450248146 |
| H     | 1.0    | -1.1849291834 | 0.0000054919  | 0.5371220212  |
| H     | 1.0    | 1.1852155450  | -0.0000020078 | 0.5369284165  |
| C     | 6.0    | -2.4545203942 | 0.0000264034  | -1.1904551055 |
| C     | 6.0    | 2.4546020662  | -0.0000150938 | -1.1907969676 |
| H     | 1.0    | -2.4322133959 | 0.0000401862  | -2.2724608572 |
| H     | 1.0    | 2.4321813569  | -0.0000204268 | -2.2727823145 |
| C     | 6.0    | -3.7063200401 | 0.0000214604  | -0.5876388194 |
| C     | 6.0    | 3.7064541692  | -0.0000203280 | -0.5880230468 |
| N     | 7.0    | -4.8436725143 | 0.0000469901  | -1.3174774736 |
| N     | 7.0    | 4.8438231019  | -0.0000535342 | -1.3177779701 |
| C     | 6.0    | -4.8891118005 | 0.0000921963  | -2.7732671058 |
| C     | 6.0    | 4.8892329215  | -0.0000998045 | -2.7735899960 |
| H     | 1.0    | -5.9224973844 | 0.0001582263  | -3.0985643557 |
| H     | 1.0    | 5.9226286177  | -0.0002577432 | -3.0988718367 |
| H     | 1.0    | -4.3976651205 | 0.8887720901  | -3.1683552065 |
| H     | 1.0    | 4.3979871826  | 0.8886662848  | -3.1687217779 |
| H     | 1.0    | -4.3977573076 | -0.8886146241 | -3.1684105475 |
| H     | 1.0    | 4.3977455751  | -0.8887552693 | -3.1686660814 |

|   |     |               |               |               |
|---|-----|---------------|---------------|---------------|
| C | 6.0 | -5.9879839136 | 0.0000172870  | -0.4964414538 |
| C | 6.0 | 5.9881544328  | -0.0000214589 | -0.4966696576 |
| C | 6.0 | -7.3256600829 | 0.0000213600  | -0.8648961350 |
| C | 6.0 | 7.3259183663  | -0.0000243447 | -0.8648727823 |
| H | 1.0 | -7.6383805559 | 0.0000500803  | -1.8985154778 |
| H | 1.0 | 7.6391079747  | -0.0000505239 | -1.8983461023 |
| C | 6.0 | -8.2721043473 | -0.0000160222 | 0.1589208984  |
| C | 6.0 | 8.2721204364  | 0.0000125893  | 0.1591922871  |
| H | 1.0 | -9.3233298526 | -0.0000148613 | -0.0959410948 |
| H | 1.0 | 9.3234139959  | 0.0000121382  | -0.0953599182 |
| C | 6.0 | -7.8862246269 | -0.0000558151 | 1.4965882562  |
| C | 6.0 | 7.8860126213  | 0.0000517387  | 1.4968028737  |
| H | 1.0 | -8.6391293594 | -0.0000851463 | 2.2729363364  |
| H | 1.0 | 8.6387823485  | 0.0000808499  | 2.2732888802  |
| C | 6.0 | -6.5325261334 | -0.0000590065 | 1.8429994249  |
| C | 6.0 | 6.5322721388  | 0.0000557405  | 1.8429258408  |
| H | 1.0 | -6.2397254067 | -0.0000909025 | 2.8848704000  |
| H | 1.0 | 6.2390951064  | 0.0000883519  | 2.8846829953  |
| C | 6.0 | -5.5850322700 | -0.0000227192 | 0.8362415527  |
| C | 6.0 | 5.5850186006  | 0.0000199594  | 0.8359654840  |
| C | 6.0 | -4.0700616359 | -0.0000184931 | 0.9035365627  |
| C | 6.0 | 4.0700634022  | 0.0000186045  | 0.9031591606  |
| C | 6.0 | -3.5624196838 | 1.2738878446  | 1.6133140531  |
| C | 6.0 | 3.5623028231  | 1.2738782945  | 1.6129493120  |
| C | 6.0 | -3.5624086434 | -1.2739543810 | 1.6132510284  |
| C | 6.0 | 3.5623086686  | -1.2738096449 | 1.6130123006  |
| H | 1.0 | -3.9061364683 | 2.1714781886  | 1.0998315269  |
| H | 1.0 | 3.9061673076  | 2.1715648723  | 1.0997555664  |
| H | 1.0 | -3.9061195296 | -2.1715221903 | 1.0997251934  |
| H | 1.0 | 3.9061773959  | -2.1715194064 | 1.0998620906  |
| H | 1.0 | -3.9453395357 | 1.2969665869  | 2.6335866525  |
| H | 1.0 | 3.9449349171  | 1.2967431297  | 2.6333356391  |
| H | 1.0 | -3.9453262303 | -1.2970855969 | 2.6335232794  |
| H | 1.0 | 3.9449415880  | -1.2966231518 | 2.6333994564  |
| H | 1.0 | -2.4755458116 | 1.3009918686  | 1.6603202063  |
| H | 1.0 | 2.4754220013  | 1.3010046076  | 1.6596558826  |
| H | 1.0 | -2.4755345838 | -1.3010522548 | 1.6602535894  |
| H | 1.0 | 2.4754279188  | -1.3009392556 | 1.6597212133  |

**Parent pentamethine indocyanine: Results at TDDFT-B3LYP-PCM/cc-pVTZ excited state optimized structure (S1)**

$E(S0^*) = -1156.542603$

$E(S1) = -1156.471347$

Oscillator strength = 2.3036

$E(\text{HOMO}) = -0.1967$ ;  $E(\text{LUMO}) = -0.1116$

| OCC | VIR | EXCITATION | DE-EXCITATION |
|-----|-----|------------|---------------|
| I   | A   | AMPLITUDE  | AMPLITUDE     |
| --- | --- | X (I->A)   | Y (A->I)      |
| 103 | 104 | 0.997242   | -0.080006     |
| 102 | 105 | -0.078320  | -0.020535     |
| 102 | 107 | 0.033798   | 0.013259      |

COORDINATES OF ALL ATOMS ARE (ANGS)

| ATOM | CHARGE | X             | Y             | Z             |
|------|--------|---------------|---------------|---------------|
| C    | 6.0    | 0.0000100271  | 0.0030620965  | -1.0647850585 |
| H    | 1.0    | -0.0000698699 | 0.0021633058  | -2.1514067258 |
| C    | 6.0    | -1.2327877523 | 0.0060244410  | -0.4121935400 |
| C    | 6.0    | 1.2328684171  | 0.0007153374  | -0.4123763129 |
| H    | 1.0    | -1.2198644278 | 0.0058486540  | 0.6692997070  |
| H    | 1.0    | 1.2200042248  | 0.0025881409  | 0.6691135663  |
| C    | 6.0    | -2.4586246279 | 0.0095911938  | -1.0960330549 |
| C    | 6.0    | 2.4586836957  | -0.0051543783 | -1.0962797962 |
| H    | 1.0    | -2.3983158649 | 0.0125174244  | -2.1776024940 |
| H    | 1.0    | 2.3985098875  | -0.0091531508 | -2.1778778444 |
| C    | 6.0    | -3.7287545812 | 0.0089553125  | -0.5432235259 |
| C    | 6.0    | 3.7287534995  | -0.0063618376 | -0.5433664243 |
| N    | 7.0    | -4.8592046805 | 0.0188164890  | -1.3283517198 |
| N    | 7.0    | 4.8591947568  | -0.0186577973 | -1.3283943471 |
| C    | 6.0    | -4.8416820808 | 0.0380974439  | -2.7810785009 |
| C    | 6.0    | 4.8417567092  | -0.0362770027 | -2.7811363362 |
| H    | 1.0    | -5.8568457826 | 0.0928084277  | -3.1563214207 |
| H    | 1.0    | 5.8571876852  | -0.0870797475 | -3.1562729631 |
| H    | 1.0    | -4.2889868325 | 0.9067392730  | -3.1399431749 |
| H    | 1.0    | 4.3686849622  | 0.8678323763  | -3.1671936034 |
| H    | 1.0    | -4.3713494633 | -0.8669711818 | -3.1683730741 |
| H    | 1.0    | 4.2921348408  | -0.9063030138 | -3.1414822208 |
| C    | 6.0    | -6.0111820500 | 0.0051963044  | -0.5616253935 |
| C    | 6.0    | 6.0112017572  | -0.0086493655 | -0.5616365516 |
| C    | 6.0    | -7.3464157810 | 0.0026313446  | -0.9732406544 |
| C    | 6.0    | 7.3463848296  | -0.0103399582 | -0.9732997265 |
| H    | 1.0    | -7.6239072381 | 0.0098428673  | -2.0167508467 |
| H    | 1.0    | 7.6237755676  | -0.0188881519 | -2.0168408657 |
| C    | 6.0    | -8.3219025759 | -0.0116939633 | 0.0152160841  |
| C    | 6.0    | 8.3219581690  | 0.0014705634  | 0.0150807543  |
| H    | 1.0    | -9.3645105112 | -0.0142541709 | -0.2726587011 |
| H    | 1.0    | 9.3645172654  | 0.0007505938  | -0.2728877222 |

|   |     |               |               |              |
|---|-----|---------------|---------------|--------------|
| C | 6.0 | -7.9824734480 | -0.0235311272 | 1.3706923578 |
| C | 6.0 | 7.9825583646  | 0.0148027529  | 1.3705418681 |
| H | 1.0 | -8.7631502274 | -0.0345542002 | 2.1189159834 |
| H | 1.0 | 8.7632637520  | 0.0238126801  | 2.1187540995 |
| C | 6.0 | -6.6414440512 | -0.0220489048 | 1.7655306807 |
| C | 6.0 | 6.6415416089  | 0.0172987014  | 1.7654207339 |
| H | 1.0 | -6.3869856592 | -0.0320906862 | 2.8173915114 |
| H | 1.0 | 6.3873180631  | 0.0283761250  | 2.8173486178 |
| C | 6.0 | -5.6586348019 | -0.0082433111 | 0.7974568610 |
| C | 6.0 | 5.6586394814  | 0.0059878896  | 0.7974208300 |
| C | 6.0 | -4.1494779296 | -0.0048751947 | 0.9264645717 |
| C | 6.0 | 4.1494436887  | 0.0068864635  | 0.9264025077 |
| C | 6.0 | -3.6746936176 | 1.2623580231  | 1.6764294988 |
| C | 6.0 | 3.6706084943  | 1.2848746949  | 1.6548307592 |
| C | 6.0 | -3.6674204557 | -1.2812742586 | 1.6554589265 |
| C | 6.0 | 3.6711637719  | -1.2585083669 | 1.6772808584 |
| H | 1.0 | -4.0077521208 | 2.1657602658  | 1.1663133223 |
| H | 1.0 | 4.0017314604  | 2.1806776545  | 1.1303024046 |
| H | 1.0 | -3.9964250851 | -2.1780402783 | 1.1312127743 |
| H | 1.0 | 4.0022082141  | -2.1632984753 | 1.1683596973 |
| H | 1.0 | -4.0887188749 | 1.2660956161  | 2.6850317878 |
| H | 1.0 | 4.0834997857  | 1.3063267016  | 2.6636588770 |
| H | 1.0 | -4.0802895945 | -1.3033093730 | 2.6642819270 |
| H | 1.0 | 4.0846433493  | -1.2621653805 | 2.6861036532 |
| H | 1.0 | -2.5897797174 | 1.2940495408  | 1.7569506985 |
| H | 1.0 | 2.5855687963  | 1.3150255517  | 1.7337557518 |
| H | 1.0 | -2.5823127219 | -1.3087983866 | 1.7344304704 |
| H | 1.0 | 2.5861472995  | -1.2874625843 | 1.7572665871 |

**Conformationally restrained pentamethine indocyanine: Results at B3LYP-PCM/cc-pVTZ ground state optimized structure (S0)**

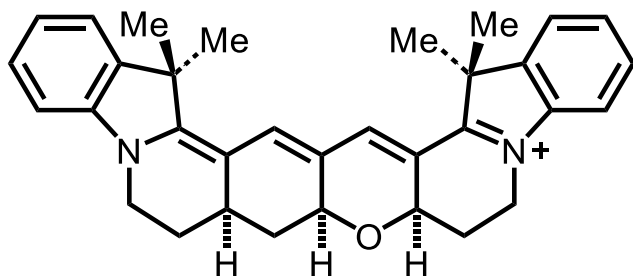

$E(S0) = -1462.755843$

$E(S1^*) = -1462.673517$

Oscillator strength = 1.9241

$E(\text{HOMO}) = -0.1904$ ;  $E(\text{LUMO}) = -0.1041$

| OCC | VIR | EXCITATION<br>AMPLITUDE | DE-EXCITATION<br>AMPLITUDE |
|-----|-----|-------------------------|----------------------------|
| I   | A   | X (I->A)                | Y (A->I)                   |
| --- | --- | -----                   | -----                      |
| 125 | 128 | 0.055652                | 0.023427                   |
| 127 | 128 | 1.001764                | -0.146502                  |
| 126 | 129 | -0.085669               | -0.020410                  |
| 126 | 131 | 0.034886                | 0.011678                   |
| 127 | 132 | 0.036903                | 0.015517                   |

COORDINATES OF ALL ATOMS ARE (ANGS)

| ATOM  | CHARGE | X             | Y             | Z             |
|-------|--------|---------------|---------------|---------------|
| ----- |        |               |               |               |
| C     | 6.0    | 0.0081447567  | -0.0677831963 | -1.2788296046 |
| C     | 6.0    | -1.2262595097 | -0.0266540475 | -0.6327846169 |
| C     | 6.0    | 1.2093449534  | -0.0307652699 | -0.5787996417 |
| H     | 1.0    | -1.2073583371 | -0.0079211098 | 0.4473486214  |
| H     | 1.0    | 1.1610519862  | 0.0161998792  | 0.4998262719  |
| C     | 6.0    | -2.4490560375 | -0.0054458568 | -1.3034702516 |
| C     | 6.0    | 2.4446685557  | -0.0276700061 | -1.2285459466 |
| C     | 6.0    | -3.6784481112 | 0.0250978758  | -0.6404362614 |
| C     | 6.0    | 3.6786729480  | 0.0174262375  | -0.5866323979 |
| N     | 7.0    | -4.8437278194 | 0.0636551493  | -1.3223180997 |
| N     | 7.0    | 4.8329726067  | 0.0683161938  | -1.2890862885 |
| C     | 6.0    | -5.9562544765 | 0.0426664168  | -0.4669260077 |
| C     | 6.0    | 5.9581388793  | 0.0452703856  | -0.4511368023 |
| C     | 6.0    | -7.3026105449 | 0.0468753985  | -0.8015919386 |
| C     | 6.0    | 7.2991566208  | 0.0552123843  | -0.8058100715 |
| H     | 1.0    | -7.6377409961 | 0.0608189823  | -1.8284040114 |
| H     | 1.0    | 7.6182337107  | 0.0774065064  | -1.8376511281 |
| C     | 6.0    | -8.2190280176 | 0.0267345684  | 0.2490613504  |
| C     | 6.0    | 8.2316430898  | 0.0293100264  | 0.2308433879  |
| H     | 1.0    | -9.2775534318 | 0.0288381332  | 0.0261070284  |
| H     | 1.0    | 9.2866668186  | 0.0347490406  | -0.0079539155 |

|   |     |               |               |               |
|---|-----|---------------|---------------|---------------|
| C | 6.0 | -7.7926071678 | 0.0014601230  | 1.5743045274  |
| C | 6.0 | 7.8257381820  | -0.0057768387 | 1.5622188030  |
| H | 1.0 | -8.5227663373 | -0.0139751542 | 2.3719806277  |
| H | 1.0 | 8.5679686047  | -0.0256077999 | 2.3485733403  |
| C | 6.0 | -6.4290300304 | -0.0072296192 | 1.8839100280  |
| C | 6.0 | 6.4669332862  | -0.0188996346 | 1.8922873508  |
| H | 1.0 | -6.1089932839 | -0.0296096025 | 2.9175127644  |
| H | 1.0 | 6.1623192011  | -0.0487477053 | 2.9303451267  |
| C | 6.0 | -5.5105726740 | 0.0111817541  | 0.8508008083  |
| C | 6.0 | 5.5327019390  | 0.0038026815  | 0.8737526319  |
| C | 6.0 | -3.9921309020 | 0.0025597549  | 0.8670542617  |
| C | 6.0 | 4.0144293499  | -0.0063726088 | 0.9139322938  |
| C | 6.0 | -3.4625850715 | 1.2639175642  | 1.5843105856  |
| C | 6.0 | 3.4912903958  | 1.2542748078  | 1.6371197210  |
| C | 6.0 | -3.4784888229 | -1.2859104411 | 1.5450837842  |
| C | 6.0 | 3.5026171787  | -1.2930718922 | 1.5948740999  |
| H | 1.0 | -3.8133099515 | 2.1700469347  | 1.0909005716  |
| H | 1.0 | 3.8338709437  | 2.1613146997  | 1.1397431589  |
| H | 1.0 | -3.8378623903 | -2.1723211050 | 1.0229227673  |
| H | 1.0 | 3.8596369841  | -2.1807457820 | 1.0733077258  |
| H | 1.0 | -3.8259731482 | 1.2738705320  | 2.6120305279  |
| H | 1.0 | 3.8655280405  | 1.2650960401  | 2.6609149662  |
| H | 1.0 | -3.8447051679 | -1.3235852162 | 2.5710817303  |
| H | 1.0 | 3.8693885014  | -1.3300069406 | 2.6207167352  |
| H | 1.0 | -2.3751960272 | 1.2880169606  | 1.6114254395  |
| H | 1.0 | 2.4040100038  | 1.2743106191  | 1.6755446477  |
| H | 1.0 | -2.3916379596 | -1.3227068340 | 1.5742242043  |
| H | 1.0 | 2.4153893593  | -1.3266544324 | 1.6239319273  |
| C | 6.0 | -4.9504909884 | 0.1161825205  | -2.7804729763 |
| C | 6.0 | 4.9115595069  | 0.1320659588  | -2.7488525414 |
| C | 6.0 | 0.0583619638  | -0.1024035843 | -2.7881084162 |
| C | 6.0 | 2.4262820435  | -0.0589086670 | -2.7513392159 |
| C | 6.0 | -2.4452036677 | -0.0140124816 | -2.8299782399 |
| C | 6.0 | -3.6809638181 | 0.7013189280  | -3.3747989989 |
| C | 6.0 | -1.1529771936 | 0.5931492891  | -3.3839505600 |
| C | 6.0 | 3.6187134964  | 0.6873630345  | -3.3250737438 |
| O | 8.0 | 1.2418420751  | 0.5427129961  | -3.2617581103 |
| H | 1.0 | 5.1212468682  | -0.8691305277 | -3.1332271300 |
| H | 1.0 | 5.7516271444  | 0.7711386530  | -3.0138159133 |
| H | 1.0 | 3.6376881139  | 0.5916671743  | -4.4096937093 |
| H | 1.0 | 3.5243343302  | 1.7468228573  | -3.0804958263 |
| H | 1.0 | 2.4601387373  | -1.1049269474 | -3.0896928082 |
| H | 1.0 | 0.0760317166  | -1.1473738191 | -3.1308829371 |
| H | 1.0 | -1.1336086390 | 0.5014047583  | -4.4706697914 |
| H | 1.0 | -1.1047676413 | 1.6570346048  | -3.1372745523 |
| H | 1.0 | -2.4923315758 | -1.0585091999 | -3.1617208226 |
| H | 1.0 | -3.7262283483 | 0.6106764988  | -4.4600455481 |
| H | 1.0 | -3.6244034738 | 1.7661649117  | -3.1366141319 |
| H | 1.0 | -5.1346674596 | -0.8935011352 | -3.1554143215 |
| H | 1.0 | -5.8154353509 | 0.7275325606  | -3.0314917879 |

**Conformationally restrained pentamethine indocyanine: Results at TDDFT-B3LYP-PCM/cc-pVTZ excited state optimized structure (S1)**

$E(S0) = -1462.753801$

$E(S1^*) = -1462.684556$

Oscillator strength = 2.1984

$E(\text{HOMO}) = -0.1910$ ;  $E(\text{LUMO}) = -0.1090$

| OCC<br>I<br>--- | VIR<br>A<br>--- | EXCITATION                     | DE-EXCITATION                  |
|-----------------|-----------------|--------------------------------|--------------------------------|
|                 |                 | AMPLITUDE<br>X (I->A)<br>----- | AMPLITUDE<br>Y (A->I)<br>----- |
| 125             | 128             | -0.035865                      | -0.023452                      |
| 127             | 128             | 0.997743                       | -0.090280                      |
| 126             | 129             | -0.079062                      | -0.022833                      |
| 126             | 131             | 0.032359                       | 0.013451                       |
| 127             | 132             | 0.030927                       | 0.014856                       |

COORDINATES OF ALL ATOMS ARE (ANGS)

| ATOM | CHARGE | X              | Y             | Z             |
|------|--------|----------------|---------------|---------------|
| C    | 6.0    | 0.1208664222   | -0.1010835341 | -0.5072587914 |
| C    | 6.0    | -1.1060190353  | -0.1234365619 | -1.1796473950 |
| C    | 6.0    | 1.3382085371   | -0.1070822070 | -1.1968556155 |
| C    | 6.0    | -2.3384415645  | -0.1082876574 | -0.5232817659 |
| C    | 6.0    | 2.5797707178   | -0.0756197308 | -0.5581185096 |
| H    | 1.0    | -2.3140596734  | -0.1060597704 | 0.5564073058  |
| H    | 1.0    | 2.5698840256   | -0.0749449529 | 0.5218555245  |
| C    | 6.0    | -3.5759185090  | -0.0915743255 | -1.1898979487 |
| C    | 6.0    | 3.8072193403   | -0.0402552845 | -1.2422951218 |
| C    | 6.0    | -4.8039797844  | -0.0858911018 | -0.5270718258 |
| C    | 6.0    | 5.0446544760   | -0.0176145300 | -0.5973747316 |
| N    | 7.0    | -5.9852534867  | -0.0623721883 | -1.2170850150 |
| N    | 7.0    | 6.2153454871   | 0.0233746017  | -1.3043660411 |
| C    | 6.0    | -7.0829855855  | -0.1072697270 | -0.3722433918 |
| C    | 6.0    | 7.3257718839   | -0.0047402317 | -0.4755081289 |
| C    | 6.0    | -8.4367930745  | -0.1234523985 | -0.7042752795 |
| C    | 6.0    | 8.6748108401   | -0.0020033807 | -0.8267371990 |
| H    | 1.0    | -8.7728790262  | -0.1105056799 | -1.7307455299 |
| H    | 1.0    | 8.9957552161   | 0.0145383834  | -1.8579674600 |
| C    | 6.0    | -9.3489985255  | -0.1635046630 | 0.3449633314  |
| C    | 6.0    | 9.6024697632   | -0.0280073448 | 0.2094017534  |
| H    | 1.0    | -10.4078696608 | -0.1772806741 | 0.1235064997  |
| H    | 1.0    | 10.6581903719  | -0.0272301576 | -0.0268936481 |
| C    | 6.0    | -8.9223066061  | -0.1889195800 | 1.6731156365  |
| C    | 6.0    | 9.1952318209   | -0.0577095170 | 1.5436246425  |
| H    | 1.0    | -9.6530064144  | -0.2201943171 | 2.4697986773  |
| H    | 1.0    | 9.9376406639   | -0.0774327858 | 2.3297872034  |
| C    | 6.0    | -7.5577312543  | -0.1776355813 | 1.9835511411  |
| C    | 6.0    | 7.8352803307   | -0.0659481830 | 1.8733117129  |
| H    | 1.0    | -7.2389277529  | -0.2004718967 | 3.0175848633  |



|   |     |               |               |               |
|---|-----|---------------|---------------|---------------|
| H | 1.0 | 7.5312423528  | -0.0924769955 | 2.9116661820  |
| C | 6.0 | -6.6383664653 | -0.1391861600 | 0.9541196972  |
| C | 6.0 | 6.9009388265  | -0.0421003544 | 0.8570587061  |
| C | 6.0 | -5.1207286290 | -0.1232924307 | 0.9749514629  |
| C | 6.0 | 5.3838059339  | -0.0500396962 | 0.8998949666  |
| C | 6.0 | -4.5886909559 | -1.4066078151 | 1.6540000856  |
| C | 6.0 | 4.8818887318  | -1.3416174677 | 1.5862192613  |
| C | 6.0 | -4.6115678530 | 1.1389110105  | 1.7098329268  |
| C | 6.0 | 4.8652660165  | 1.2040535304  | 1.6420916741  |
| H | 1.0 | -4.9379447504 | -2.2973575405 | 1.1324767317  |
| H | 1.0 | 5.2381358577  | -2.2267172426 | 1.0598358199  |
| H | 1.0 | -4.9857470237 | 2.0446491139  | 1.2333315771  |
| H | 1.0 | 5.2154475096  | 2.1156121963  | 1.1585028095  |
| H | 1.0 | -4.9514064817 | -1.4486386101 | 2.6813934691  |
| H | 1.0 | 5.2590036159  | -1.3779442353 | 2.6086053068  |
| H | 1.0 | -4.9648008593 | 1.1255073475  | 2.7413966079  |
| H | 1.0 | 5.2356869984  | 1.1980784984  | 2.6676396355  |
| H | 1.0 | -3.5013269982 | -1.4284148686 | 1.6795010565  |
| H | 1.0 | 3.7954637600  | -1.3805470200 | 1.6263499590  |
| H | 1.0 | -3.5245614837 | 1.1835094074  | 1.7257828425  |
| H | 1.0 | 3.7780181280  | 1.2300708671  | 1.6760015450  |
| H | 1.0 | 0.1279936752  | -0.0640508469 | 0.5766323991  |
| C | 6.0 | 6.2924822198  | 0.0714554838  | -2.7615703122 |
| C | 6.0 | -6.0831845742 | -0.0211397619 | -2.6732261992 |
| C | 6.0 | -3.5770350725 | -0.0871837089 | -2.7140135901 |
| C | 6.0 | -1.0769068621 | -0.1519138158 | -2.6905457047 |
| C | 6.0 | 1.2886265130  | -0.1348479639 | -2.7071968355 |
| C | 6.0 | 3.7869197626  | -0.0333144912 | -2.7662857794 |
| C | 6.0 | -4.8277834550 | 0.6006347518  | -3.2595011740 |
| C | 6.0 | -2.2966701023 | 0.5399475988  | -3.2709985004 |
| C | 6.0 | 5.0190789940  | 0.6749337025  | -3.3278873028 |
| C | 6.0 | 2.4895953745  | 0.5757873615  | -3.3037609400 |
| O | 8.0 | 0.0978622169  | 0.4795040025  | -3.1940994122 |
| H | 1.0 | 7.1630117427  | 0.6647548463  | -3.0361905668 |
| H | 1.0 | 6.4471126268  | -0.9429721463 | -3.1409823369 |
| H | 1.0 | -6.2259312100 | -1.0396243623 | -3.0464445740 |
| H | 1.0 | -6.9671241644 | 0.5563681415  | -2.9383965060 |
| H | 1.0 | -4.7991505092 | 1.6657154234  | -3.0171880834 |
| H | 1.0 | 4.9773004376  | 1.7387586520  | -3.0822247902 |
| H | 1.0 | 5.0423120061  | 0.5901997473  | -4.4144456073 |
| H | 1.0 | -4.8653188592 | 0.5124984297  | -4.3453560466 |
| H | 1.0 | -2.2835631390 | 0.4555715641  | -4.3584625101 |
| H | 1.0 | -2.2573735236 | 1.6025104837  | -3.0172123416 |
| H | 1.0 | 2.4621730247  | 0.4930528442  | -4.3910442761 |
| H | 1.0 | 2.4384959965  | 1.6372103907  | -3.0474808637 |
| H | 1.0 | 3.8234777097  | -1.0787343833 | -3.1004766884 |
| H | 1.0 | 1.2964736654  | -1.1858248349 | -3.0387930672 |
| H | 1.0 | -1.0735602998 | -1.2031527354 | -3.0212697272 |
| H | 1.0 | -3.6026630486 | -1.1338439098 | -3.0455077095 |

**Parent heptamethine indocyanine: Results at B3LYP-PCM/cc-pVTZ ground state optimized structure (S0)**

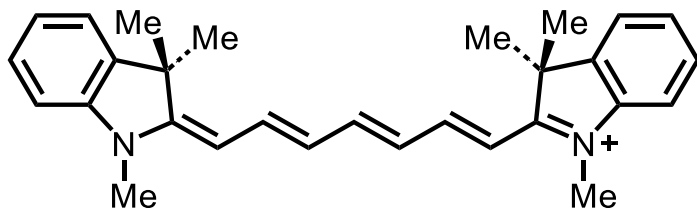

$E(S0) = -1233.929417$

$E(S1^*) = -1233.852646$

Oscillator strength = 2.6792

$E(\text{HOMO}) = -0.1898$ ;  $E(\text{LUMO}) = -0.1108$

| OCC | VIR | EXCITATION<br>AMPLITUDE | DE-EXCITATION<br>AMPLITUDE |
|-----|-----|-------------------------|----------------------------|
| I   | A   | X (I->A)                | Y (A->I)                   |
| --- | --- | -----                   | -----                      |
| 108 | 111 | 0.065672                | 0.028473                   |
| 110 | 111 | 1.002232                | -0.156535                  |
| 109 | 112 | 0.103635                | 0.023700                   |
| 110 | 115 | -0.036216               | -0.014286                  |

COORDINATES OF ALL ATOMS ARE (ANGS)

| ATOM  | CHARGE | X             | Y             | Z             |
|-------|--------|---------------|---------------|---------------|
| ----- | -----  | -----         | -----         | -----         |
| C     | 6.0    | 0.1204506943  | -0.0839283767 | -0.5292279538 |
| C     | 6.0    | -1.1160531975 | -0.0911748710 | -1.1669097667 |
| C     | 6.0    | 1.3472774383  | -0.0748238285 | -1.1852605833 |
| C     | 6.0    | -2.3244020351 | -0.1015345827 | -0.4835518021 |
| C     | 6.0    | 2.5657289771  | -0.0674333084 | -0.5200950677 |
| H     | 1.0    | -2.2739473282 | -0.1038756612 | 0.5977936100  |
| H     | 1.0    | 2.5306515996  | -0.0682201055 | 0.5619138459  |
| C     | 6.0    | -3.5690361819 | -0.1088819894 | -1.1134549131 |
| C     | 6.0    | 3.8010267276  | -0.0592076753 | -1.1679990326 |
| H     | 1.0    | -3.5583287696 | -0.1049422085 | -2.1957595466 |
| H     | 1.0    | 3.7754592132  | -0.0598814442 | -2.2500234959 |
| C     | 6.0    | -4.8127986852 | -0.1211095411 | -0.4978538988 |
| C     | 6.0    | 5.0535637658  | -0.0507999102 | -0.5703155273 |
| N     | 7.0    | -5.9599038785 | -0.1269295846 | -1.2158914914 |
| N     | 7.0    | 6.1904347994  | -0.0401589077 | -1.3044819389 |
| C     | 6.0    | -6.0210225228 | -0.1202828415 | -2.6705402392 |
| C     | 6.0    | 6.2305298009  | -0.0341401553 | -2.7599102715 |
| H     | 1.0    | -7.0579257607 | -0.1261481816 | -2.9844386450 |
| H     | 1.0    | 7.2616554173  | 0.0114591909  | -3.0894847604 |
| H     | 1.0    | -5.5275853967 | -1.0034065369 | -3.0758172816 |
| H     | 1.0    | 5.7742190765  | -0.9406811855 | -3.1573515356 |
| H     | 1.0    | -5.5402263999 | 0.7736976209  | -3.0670893124 |
| H     | 1.0    | 5.7014890968  | 0.8348945497  | -3.1499092058 |
| C     | 6.0    | -7.0938755055 | -0.1413058715 | -0.3825325937 |

|   |     |                |               |               |
|---|-----|----------------|---------------|---------------|
| C | 6.0 | 7.3361527804   | -0.0394264842 | -0.4871862438 |
| C | 6.0 | -8.4357376301  | -0.1510477620 | -0.7362529527 |
| C | 6.0 | 8.6732127431   | -0.0345812690 | -0.8588097034 |
| H | 1.0 | -8.7598327850  | -0.1481727220 | -1.7663765341 |
| H | 1.0 | 8.9833331908   | -0.0319993294 | -1.8932324549 |
| C | 6.0 | -9.3710694340  | -0.1651439746 | 0.2975712939  |
| C | 6.0 | 9.6225345841   | -0.0342672746 | 0.1624166060  |
| H | 1.0 | -10.4249303300 | -0.1730302549 | 0.0537190256  |
| H | 1.0 | 10.6730515191  | -0.0306675152 | -0.0953690467 |
| C | 6.0 | -8.9710125373  | -0.1692379465 | 1.6309706628  |
| C | 6.0 | 9.2406609512   | -0.0389185889 | 1.5012129724  |
| H | 1.0 | -9.7154882104  | -0.1803825312 | 2.4153344974  |
| H | 1.0 | 9.9957006439   | -0.0385968334 | 2.2755010419  |
| C | 6.0 | -7.6134392972  | -0.1589961837 | 1.9627448289  |
| C | 6.0 | 7.8877864671   | -0.0447053328 | 1.8510408091  |
| H | 1.0 | -7.3095696238  | -0.1621788658 | 3.0014737140  |
| H | 1.0 | 7.5976093847   | -0.0489841868 | 2.8936564463  |
| C | 6.0 | -6.6766573378  | -0.1449238449 | 0.9461352360  |
| C | 6.0 | 6.9374394801   | -0.0453530649 | 0.8471506486  |
| C | 6.0 | -5.1609191677  | -0.1312803089 | 0.9972706456  |
| C | 6.0 | 5.4225550864   | -0.0526511422 | 0.9195484132  |
| C | 6.0 | -4.6337868376  | -1.4030196198 | 1.6964287292  |
| C | 6.0 | 4.9232777891   | -1.3301552177 | 1.6285986140  |
| C | 6.0 | -4.6572074159  | 1.1438005174  | 1.7077083546  |
| C | 6.0 | 4.9108537125   | 1.2169701415  | 1.6340965545  |
| H | 1.0 | -4.9744133433  | -2.3018133132 | 1.1829545920  |
| H | 1.0 | 5.2700073694   | -2.2251680284 | 1.1126109058  |
| H | 1.0 | -5.0147790075  | 2.0406300440  | 1.2023641264  |
| H | 1.0 | 5.2494732588   | 2.1175265001  | 1.1223882940  |
| H | 1.0 | -5.0054819184  | -1.4338768276 | 2.7207084381  |
| H | 1.0 | 5.3087378288   | -1.3534053079 | 2.6479565908  |
| H | 1.0 | -5.0289748191  | 1.1588901112  | 2.7323383285  |
| H | 1.0 | 5.2954407019   | 1.2391684453  | 2.6538095237  |
| H | 1.0 | -3.5462282496  | -1.4198831820 | 1.7315850205  |
| H | 1.0 | 3.8366321670   | -1.3625545116 | 1.6781186274  |
| H | 1.0 | -3.5701332891  | 1.1802490337  | 1.7426411155  |
| H | 1.0 | 3.8238902409   | 1.2390137524  | 1.6828945062  |
| H | 1.0 | 0.1281000312   | -0.0856791308 | 0.5576963778  |
| H | 1.0 | -1.1351558433  | -0.0890087201 | -2.2524181365 |
| H | 1.0 | 1.3507712110   | -0.0735216443 | -2.2709594206 |

**Parent heptamethine indocyanine: Results at TDDFT-B3LYP-PCM/cc-pVTZ excited state optimized structure (S1)**

$E(S0^*) = -1233.928031$

$E(S1) = -1233.864627$

Oscillator strength = 2.8196

$E(\text{HOMO}) = -0.1904$ ;  $E(\text{LUMO}) = -0.1143$

| OCC | VIR | EXCITATION<br>AMPLITUDE | DE-EXCITATION<br>AMPLITUDE |
|-----|-----|-------------------------|----------------------------|
| I   | A   | X (I->A)                | Y (A->I)                   |
| --- | --- | -----                   | -----                      |
| 110 | 111 | 0.997264                | -0.083759                  |
| 109 | 112 | 0.089567                | 0.025867                   |

COORDINATES OF ALL ATOMS ARE (ANGS)

| ATOM  | CHARGE | X              | Y             | Z             |
|-------|--------|----------------|---------------|---------------|
| ----- | -----  | -----          | -----         | -----         |
| C     | 6.0    | 0.1218201239   | -0.0909176396 | -0.3777313420 |
| C     | 6.0    | -1.1161453469  | -0.0975613411 | -1.0231936749 |
| C     | 6.0    | 1.3498604672   | -0.0823580898 | -1.0419286496 |
| C     | 6.0    | -2.3421017804  | -0.1064006518 | -0.3631526034 |
| C     | 6.0    | 2.5855821392   | -0.0735905133 | -0.4003952767 |
| H     | 1.0    | -2.3197255065  | -0.1088387026 | 0.7184411347  |
| H     | 1.0    | 2.5785451417   | -0.0733282317 | 0.6813852715  |
| C     | 6.0    | -3.5734019173  | -0.1117845924 | -1.0339242009 |
| C     | 6.0    | 3.8067427606   | -0.0640852826 | -1.0894335913 |
| H     | 1.0    | -3.5258954388  | -0.1073706844 | -2.1160663559 |
| H     | 1.0    | 3.7429745276   | -0.0654798201 | -2.1707553001 |
| C     | 6.0    | -4.8376958262  | -0.1222547919 | -0.4660123424 |
| C     | 6.0    | 5.0791084635   | -0.0529985364 | -0.5399125831 |
| N     | 7.0    | -5.9725293985  | -0.1255447081 | -1.2345039693 |
| N     | 7.0    | 6.2032732895   | -0.0400700034 | -1.3238693116 |
| C     | 6.0    | -5.9744546698  | -0.1170036405 | -2.6880192531 |
| C     | 6.0    | 6.1846365197   | -0.0328629674 | -2.7772249234 |
| H     | 1.0    | -6.9961592101  | -0.1175388493 | -3.0491586804 |
| H     | 1.0    | 7.1999556633   | 0.0158144561  | -3.1529839482 |
| H     | 1.0    | -5.4659417610  | -1.0013823322 | -3.0736174870 |
| H     | 1.0    | 5.7125450797   | -0.9401726652 | -3.1563779612 |
| H     | 1.0    | -5.4709937596  | 0.7748597406  | -3.0626972243 |
| H     | 1.0    | 5.6346557732   | 0.8342224884  | -3.1437724919 |
| C     | 6.0    | -7.1203193911  | -0.1386981208 | -0.4518220075 |
| C     | 6.0    | 7.3617498424   | -0.0371159895 | -0.5569284995 |
| C     | 6.0    | -8.4574889277  | -0.1467759286 | -0.8489300096 |
| C     | 6.0    | 8.6935454248   | -0.0299969471 | -0.9716537321 |
| H     | 1.0    | -8.7465593218  | -0.1433285637 | -1.8893478427 |
| H     | 1.0    | 8.9689614681   | -0.0275425236 | -2.0158283921 |
| C     | 6.0    | -9.4234331933  | -0.1599298044 | 0.1509395767  |
| C     | 6.0    | 9.6727056039   | -0.0275394342 | 0.0154356990  |
| H     | 1.0    | -10.4689505522 | -0.1664962033 | -0.1263160832 |
| H     | 1.0    | 10.7144368067  | -0.0221356156 | -0.2755870227 |

|   |     |               |               |               |
|---|-----|---------------|---------------|---------------|
| C | 6.0 | -9.0692276851 | -0.1649584156 | 1.5011085740  |
| C | 6.0 | 9.3364160828  | -0.0323077252 | 1.3702705132  |
| H | 1.0 | -9.8411165314 | -0.1752999282 | 2.2584544576  |
| H | 1.0 | 10.1182630429 | -0.0301668168 | 2.1173868719  |
| C | 6.0 | -7.7237534380 | -0.1567325367 | 1.8803227836  |
| C | 6.0 | 7.9962198763  | -0.0405720272 | 1.7671447821  |
| H | 1.0 | -7.4569279109 | -0.1608240909 | 2.9291769837  |
| H | 1.0 | 7.7433083215  | -0.0448287474 | 2.8194873779  |
| C | 6.0 | -6.7520048399 | -0.1436178381 | 0.9000789927  |
| C | 6.0 | 7.0116783933  | -0.0434392456 | 0.7998615862  |
| C | 6.0 | -5.2409226087 | -0.1327006925 | 1.0100212557  |
| C | 6.0 | 5.5021876425  | -0.0530281414 | 0.9303465160  |
| C | 6.0 | -4.7433920430 | -1.4047140174 | 1.7350556698  |
| C | 6.0 | 5.0325353269  | -1.3289563378 | 1.6669808225  |
| C | 6.0 | -4.7626151794 | 1.1395172463  | 1.7476629373  |
| C | 6.0 | 5.0166812780  | 1.2154376906  | 1.6699885947  |
| H | 1.0 | -5.0739880964 | -2.3043311112 | 1.2166836945  |
| H | 1.0 | 5.3675889049  | -2.2259732723 | 1.1469905847  |
| H | 1.0 | -5.1052233109 | 2.0391330979  | 1.2371317411  |
| H | 1.0 | 5.3424604673  | 2.1177445811  | 1.1532590872  |
| H | 1.0 | -5.1445346163 | -1.4268372871 | 2.7485897992  |
| H | 1.0 | 5.4486398469  | -1.3421101695 | 2.6746271389  |
| H | 1.0 | -5.1655083560 | 1.1466769358  | 2.7607335561  |
| H | 1.0 | 5.4308032117  | 1.2302104839  | 2.6784250799  |
| H | 1.0 | -3.6573144588 | -1.4265898935 | 1.8012319780  |
| H | 1.0 | 3.9479593827  | -1.3653287221 | 1.7495103454  |
| H | 1.0 | -3.6770489610 | 1.1760227909  | 1.8158776346  |
| H | 1.0 | 3.9315662787  | 1.2392377801  | 1.7502929104  |
| H | 1.0 | 0.1296967450  | -0.0920291063 | 0.7083368953  |
| H | 1.0 | -1.1219656866 | -0.0956460732 | -2.1097679381 |
| H | 1.0 | 1.3400208364  | -0.0819797008 | -2.1284785070 |

*Conformationally restrained heptamethine indocyanine: Results at B3LYP-PCM/cc-pVTZ ground state optimized structure (S0)*

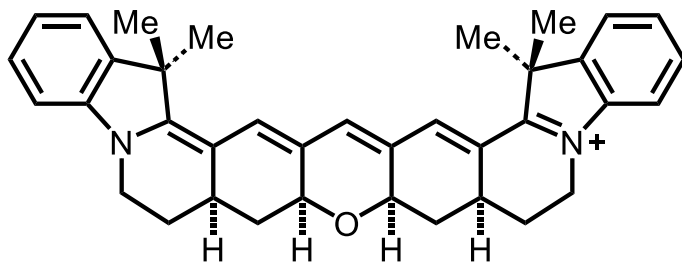

$E(S0) = -1617.539846$

$E(S1^*) = -1617.467141$

Oscillator strength = 2.4005

$E(\text{HOMO}) = -0.1823$ ;  $E(\text{LUMO}) = -0.1079$

| OCC | VIR | EXCITATION<br>AMPLITUDE | DE-EXCITATION<br>AMPLITUDE |
|-----|-----|-------------------------|----------------------------|
| I   | A   | X (I->A)                | Y (A->I)                   |
| --- | --- | -----                   | -----                      |
| 139 | 142 | 0.053893                | 0.024613                   |
| 141 | 142 | -1.005217               | 0.168146                   |
| 140 | 143 | 0.097910                | 0.025190                   |
| 141 | 146 | 0.033313                | 0.014891                   |

COORDINATES OF ALL ATOMS ARE (ANGS)

| ATOM  | CHARGE | X              | Y             | Z             |
|-------|--------|----------------|---------------|---------------|
| ----- |        |                |               |               |
| C     | 6.0    | 0.1202111649   | -0.1992484611 | -0.5824022723 |
| C     | 6.0    | -1.1013152766  | -0.2103184851 | -1.2517102110 |
| C     | 6.0    | 1.3330189557   | -0.1975792060 | -1.2677828579 |
| C     | 6.0    | -2.3201696534  | -0.1710559916 | -0.5819702487 |
| C     | 6.0    | 2.5602681308   | -0.1401567859 | -0.6149831116 |
| H     | 1.0    | -2.2804868222  | -0.1747080633 | 0.4976707871  |
| H     | 1.0    | 2.5345244593   | -0.1359969494 | 0.4651789944  |
| C     | 6.0    | -3.5589479387  | -0.1240823997 | -1.2274487805 |
| C     | 6.0    | 3.7899133949   | -0.0852847337 | -1.2776247942 |
| C     | 6.0    | -4.7718003744  | -0.0945107034 | -0.5397976180 |
| C     | 6.0    | 5.0117946117   | -0.0318775600 | -0.6077928188 |
| N     | 7.0    | -5.9536599033  | -0.0262620572 | -1.1960390150 |
| N     | 7.0    | 6.1836162270   | 0.0363349381  | -1.2822419258 |
| C     | 6.0    | -7.0460508886  | -0.0558117933 | -0.3174093631 |
| C     | 6.0    | 7.2885022983   | 0.0403238360  | -0.4192029834 |
| C     | 6.0    | -8.4000937836  | -0.0267309519 | -0.6200116173 |
| C     | 6.0    | 8.6375207567   | 0.0780494383  | -0.7425225996 |
| H     | 1.0    | -8.7593276533  | 0.0185297205  | -1.6378666611 |
| H     | 1.0    | 8.9806153186   | 0.1025012036  | -1.7665667109 |
| C     | 6.0    | -9.2928041112  | -0.0629266360 | 0.4506671888  |
| C     | 6.0    | 9.5462065579   | 0.0785294708  | 0.3151944654  |
| H     | 1.0    | -10.3559943576 | -0.0425208373 | 0.2517879893  |

|   |     |               |               |               |
|---|-----|---------------|---------------|---------------|
| H | 1.0 | 10.6060600117 | 0.1067548271  | 0.1001174977  |
| C | 6.0 | -8.8372877264 | -0.1280422378 | 1.7647712882  |
| C | 6.0 | 9.1107125327  | 0.0404906977  | 1.6370998569  |
| H | 1.0 | -9.5492561700 | -0.1557903863 | 2.5784203795  |
| H | 1.0 | 9.8347264367  | 0.0417171832  | 2.4405329252  |
| C | 6.0 | -7.4670809597 | -0.1604127358 | 2.0423830620  |
| C | 6.0 | 7.7451379365  | -0.0026451185 | 1.9356804524  |
| H | 1.0 | -7.1239478526 | -0.2133706030 | 3.0675598564  |
| H | 1.0 | 7.4175821237  | -0.0353652903 | 2.9667300916  |
| C | 6.0 | -6.5720633132 | -0.1258301848 | 0.9896698968  |
| C | 6.0 | 6.8344072354  | -0.0049189347 | 0.8958672176  |
| C | 6.0 | -5.0534535476 | -0.1493369058 | 0.9729510990  |
| C | 6.0 | 5.3163793274  | -0.0524173786 | 0.9018251244  |
| C | 6.0 | -4.5377988012 | -1.4564363068 | 1.6123298332  |
| C | 6.0 | 4.8320551470  | -1.3562097797 | 1.5723450964  |
| C | 6.0 | -4.4982031793 | 1.0906937194  | 1.7082302271  |
| C | 6.0 | 4.7496011318  | 1.1910557341  | 1.6216295014  |
| H | 1.0 | -4.9151239060 | -2.3281478279 | 1.0781974784  |
| H | 1.0 | 5.2166373642  | -2.2311902594 | 1.0488287688  |
| H | 1.0 | -4.8562726154 | 2.0107457625  | 1.2467659877  |
| H | 1.0 | 5.0776608796  | 2.1084405671  | 1.1333609809  |
| H | 1.0 | -4.8842172276 | -1.5133419321 | 2.6443696466  |
| H | 1.0 | 5.1934626666  | -1.3890819611 | 2.6003142624  |
| H | 1.0 | -4.8354443963 | 1.0768997070  | 2.7448917109  |
| H | 1.0 | 5.1073711084  | 1.2071099870  | 2.6513408290  |
| H | 1.0 | -3.4509471777 | -1.5025305284 | 1.6193384447  |
| H | 1.0 | 3.7463333199  | -1.4200214395 | 1.5953297170  |
| H | 1.0 | -3.4103242891 | 1.1086732819  | 1.7081331444  |
| H | 1.0 | 3.6617562953  | 1.1854131892  | 1.6432810310  |
| H | 1.0 | 0.1267730034  | -0.1684086538 | 0.5024980110  |
| C | 6.0 | 6.2972028432  | 0.0958981778  | -2.7387778103 |
| C | 6.0 | -6.0887970970 | 0.0627724640  | -2.6493933611 |
| C | 6.0 | -3.5855165095 | -0.1004914731 | -2.7533531727 |
| C | 6.0 | -1.0807988499 | -0.2202960224 | -2.7649943355 |
| C | 6.0 | 1.2906352127  | -0.2139799607 | -2.7806017002 |
| C | 6.0 | 3.7939853340  | -0.0810023494 | -2.8041345872 |
| C | 6.0 | -4.8226714224 | 0.6431368118  | -3.2564990275 |
| C | 6.0 | -2.2964680502 | 0.5007838201  | -3.3218192473 |
| C | 6.0 | 5.0198680803  | 0.6596102912  | -3.3376975364 |
| C | 6.0 | 2.4942341873  | 0.5090491547  | -3.3596583005 |
| O | 8.0 | 0.0998551372  | 0.4106299942  | -3.2625482262 |
| H | 1.0 | 7.1516640278  | 0.7243596521  | -2.9838699766 |
| H | 1.0 | 6.5024363580  | -0.9084997631 | -3.1177032176 |
| H | 1.0 | -6.2962957157 | -0.9345436870 | -3.0453688343 |
| H | 1.0 | -6.9490509627 | 0.6928755893  | -2.8689950476 |
| H | 1.0 | -4.7454628082 | 1.7011195665  | -2.9945362119 |
| H | 1.0 | 4.9417324365  | 1.7217751310  | -3.0936352352 |
| H | 1.0 | 5.0729552634  | 0.5763394879  | -4.4232061452 |
| H | 1.0 | -4.8915375997 | 0.5792022640  | -4.3423626957 |
| H | 1.0 | -2.3006910598 | 0.4304281354  | -4.4103800420 |
| H | 1.0 | -2.2297062707 | 1.5590388721  | -3.0556059388 |
| H | 1.0 | 2.4837662607  | 0.4298008171  | -4.4475653398 |

|   |     |               |               |               |
|---|-----|---------------|---------------|---------------|
| H | 1.0 | 2.4258610728  | 1.5691040910  | -3.1012677564 |
| H | 1.0 | 3.8595177710  | -1.1217901760 | -3.1443932540 |
| H | 1.0 | 1.2977612820  | -1.2569768558 | -3.1314843065 |
| H | 1.0 | -1.0896753258 | -1.2618933091 | -3.1201044522 |
| H | 1.0 | -3.6532427468 | -1.1370068877 | -3.1059553255 |



**Conformationally restrained heptamethine indocyanine: Results at TDDFT-B3LYP-PCM/cc-pVTZ excited state optimized structure (S1)**

$E(S0) = -1617.538648$

$E(S1^*) = -1617.478241$

Oscillator strength = 2.6624

$E(\text{HOMO}) = -0.1829$ ;  $E(\text{LUMO}) = -0.1111$

| OCC | VIR | EXCITATION | DE-EXCITATION |
|-----|-----|------------|---------------|
| I   | A   | AMPLITUDE  | AMPLITUDE     |
| --- | --- | X (I->A)   | Y (A->I)      |
| 139 | 142 | -0.032261  | -0.021974     |
| 141 | 142 | 0.998434   | -0.097087     |
| 140 | 143 | 0.087801   | 0.028019      |

COORDINATES OF ALL ATOMS ARE (ANGS)

| ATOM | CHARGE | X              | Y             | Z             |
|------|--------|----------------|---------------|---------------|
| C    | 6.0    | 0.1208664222   | -0.1010835341 | -0.5072587914 |
| C    | 6.0    | -1.1060190353  | -0.1234365619 | -1.1796473950 |
| C    | 6.0    | 1.3382085371   | -0.1070822070 | -1.1968556155 |
| C    | 6.0    | -2.3384415645  | -0.1082876574 | -0.5232817659 |
| C    | 6.0    | 2.5797707178   | -0.0756197308 | -0.5581185096 |
| H    | 1.0    | -2.3140596734  | -0.1060597704 | 0.5564073058  |
| H    | 1.0    | 2.5698840256   | -0.0749449529 | 0.5218555245  |
| C    | 6.0    | -3.5759185090  | -0.0915743255 | -1.1898979487 |
| C    | 6.0    | 3.8072193403   | -0.0402552845 | -1.2422951218 |
| C    | 6.0    | -4.8039797844  | -0.0858911018 | -0.5270718258 |
| C    | 6.0    | 5.0446544760   | -0.0176145300 | -0.5973747316 |
| N    | 7.0    | -5.9852534867  | -0.0623721883 | -1.2170850150 |
| N    | 7.0    | 6.2153454871   | 0.0233746017  | -1.3043660411 |
| C    | 6.0    | -7.0829855855  | -0.1072697270 | -0.3722433918 |
| C    | 6.0    | 7.3257718839   | -0.0047402317 | -0.4755081289 |
| C    | 6.0    | -8.4367930745  | -0.1234523985 | -0.7042752795 |
| C    | 6.0    | 8.6748108401   | -0.0020033807 | -0.8267371990 |
| H    | 1.0    | -8.7728790262  | -0.1105056799 | -1.7307455299 |
| H    | 1.0    | 8.9957552161   | 0.0145383834  | -1.8579674600 |
| C    | 6.0    | -9.3489985255  | -0.1635046630 | 0.3449633314  |
| C    | 6.0    | 9.6024697632   | -0.0280073448 | 0.2094017534  |
| H    | 1.0    | -10.4078696608 | -0.1772806741 | 0.1235064997  |
| H    | 1.0    | 10.6581903719  | -0.0272301576 | -0.0268936481 |
| C    | 6.0    | -8.9223066061  | -0.1889195800 | 1.6731156365  |
| C    | 6.0    | 9.1952318209   | -0.0577095170 | 1.5436246425  |
| H    | 1.0    | -9.6530064144  | -0.2201943171 | 2.4697986773  |
| H    | 1.0    | 9.9376406639   | -0.0774327858 | 2.3297872034  |
| C    | 6.0    | -7.5577312543  | -0.1776355813 | 1.9835511411  |
| C    | 6.0    | 7.8352803307   | -0.0659481830 | 1.8733117129  |
| H    | 1.0    | -7.2389277529  | -0.2004718967 | 3.0175848633  |
| H    | 1.0    | 7.5312423528   | -0.0924769955 | 2.9116661820  |
| C    | 6.0    | -6.6383664653  | -0.1391861600 | 0.9541196972  |

|   |     |               |               |               |
|---|-----|---------------|---------------|---------------|
| C | 6.0 | 6.9009388265  | -0.0421003544 | 0.8570587061  |
| C | 6.0 | -5.1207286290 | -0.1232924307 | 0.9749514629  |
| C | 6.0 | 5.3838059339  | -0.0500396962 | 0.8998949666  |
| C | 6.0 | -4.5886909559 | -1.4066078151 | 1.6540000856  |
| C | 6.0 | 4.8818887318  | -1.3416174677 | 1.5862192613  |
| C | 6.0 | -4.6115678530 | 1.1389110105  | 1.7098329268  |
| C | 6.0 | 4.8652660165  | 1.2040535304  | 1.6420916741  |
| H | 1.0 | -4.9379447504 | -2.2973575405 | 1.1324767317  |
| H | 1.0 | 5.2381358577  | -2.2267172426 | 1.0598358199  |
| H | 1.0 | -4.9857470237 | 2.0446491139  | 1.2333315771  |
| H | 1.0 | 5.2154475096  | 2.1156121963  | 1.1585028095  |
| H | 1.0 | -4.9514064817 | -1.4486386101 | 2.6813934691  |
| H | 1.0 | 5.2590036159  | -1.3779442353 | 2.6086053068  |
| H | 1.0 | -4.9648008593 | 1.1255073475  | 2.7413966079  |
| H | 1.0 | 5.2356869984  | 1.1980784984  | 2.6676396355  |
| H | 1.0 | -3.5013269982 | -1.4284148686 | 1.6795010565  |
| H | 1.0 | 3.7954637600  | -1.3805470200 | 1.6263499590  |
| H | 1.0 | -3.5245614837 | 1.1835094074  | 1.7257828425  |
| H | 1.0 | 3.7780181280  | 1.2300708671  | 1.6760015450  |
| H | 1.0 | 0.1279936752  | -0.0640508469 | 0.5766323991  |
| C | 6.0 | 6.2924822198  | 0.0714554838  | -2.7615703122 |
| C | 6.0 | -6.0831845742 | -0.0211397619 | -2.6732261992 |
| C | 6.0 | -3.5770350725 | -0.0871837089 | -2.7140135901 |
| C | 6.0 | -1.0769068621 | -0.1519138158 | -2.6905457047 |
| C | 6.0 | 1.2886265130  | -0.1348479639 | -2.7071968355 |
| C | 6.0 | 3.7869197626  | -0.0333144912 | -2.7662857794 |
| C | 6.0 | -4.8277834550 | 0.6006347518  | -3.2595011740 |
| C | 6.0 | -2.2966701023 | 0.5399475988  | -3.2709985004 |
| C | 6.0 | 5.0190789940  | 0.6749337025  | -3.3278873028 |
| C | 6.0 | 2.4895953745  | 0.5757873615  | -3.3037609400 |
| O | 8.0 | 0.0978622169  | 0.4795040025  | -3.1940994122 |
| H | 1.0 | 7.1630117427  | 0.6647548463  | -3.0361905668 |
| H | 1.0 | 6.4471126268  | -0.9429721463 | -3.1409823369 |
| H | 1.0 | -6.2259312100 | -1.0396243623 | -3.0464445740 |
| H | 1.0 | -6.9671241644 | 0.5563681415  | -2.9383965060 |
| H | 1.0 | -4.7991505092 | 1.6657154234  | -3.0171880834 |
| H | 1.0 | 4.9773004376  | 1.7387586520  | -3.0822247902 |
| H | 1.0 | 5.0423120061  | 0.5901997473  | -4.4144456073 |
| H | 1.0 | -4.8653188592 | 0.5124984297  | -4.3453560466 |
| H | 1.0 | -2.2835631390 | 0.4555715641  | -4.3584625101 |
| H | 1.0 | -2.2573735236 | 1.6025104837  | -3.0172123416 |
| H | 1.0 | 2.4621730247  | 0.4930528442  | -4.3910442761 |
| H | 1.0 | 2.4384959965  | 1.6372103907  | -3.0474808637 |
| H | 1.0 | 3.8234777097  | -1.0787343833 | -3.1004766884 |
| H | 1.0 | 1.2964736654  | -1.1858248349 | -3.0387930672 |
| H | 1.0 | -1.0735602998 | -1.2031527354 | -3.0212697272 |
| H | 1.0 | -3.6026630486 | -1.1338439098 | -3.0455077095 |

**Section S6. Raw ORMAS-PT2-PCM/6-31G(d) Results:** Absolute energies (hartree) and geometries (Å)

*Parent trimethine indocyanine: ORMAS-PT2-PCM/6-31G(d) energies at B3LYP-PCM/6-31G(d) ground state optimized structure (S0)*

$E(S0) = -1075.913573$

$E(S1^*) = -1075.825042$

COORDINATES OF ALL ATOMS ARE (ANGS)

| ATOM | CHARGE | X             | Y             | Z             |
|------|--------|---------------|---------------|---------------|
| C    | 6.0    | -0.0000720793 | -0.0007505815 | 0.5514343184  |
| H    | 1.0    | -0.0001195910 | -0.0005935117 | -0.5313460857 |
| C    | 6.0    | -1.2260152897 | 0.0053807762  | 1.2224636028  |
| C    | 6.0    | 1.2259852617  | -0.0069528233 | 1.2222911828  |
| H    | 1.0    | -1.1833212790 | 0.0039062668  | 2.3079868139  |
| H    | 1.0    | 1.1832559755  | -0.0059878323 | 2.3077942298  |
| C    | 6.0    | -2.4942538058 | 0.0114321315  | 0.6368849531  |
| C    | 6.0    | 2.4942305804  | -0.0119995848 | 0.6367674356  |
| N    | 7.0    | -3.6219405890 | 0.0276032936  | 1.3886109853  |
| N    | 7.0    | 3.6218540244  | -0.0275497097 | 1.3886975873  |
| C    | 6.0    | -3.6392827683 | 0.0502265653  | 2.8492303341  |
| C    | 6.0    | 3.6387765777  | -0.0512806157 | 2.8493084161  |
| H    | 1.0    | -4.6669112537 | 0.1432798484  | 3.1950019596  |
| H    | 1.0    | 4.6665216677  | -0.1408496313 | 3.1955772734  |
| H    | 1.0    | -3.2108415798 | -0.8738523199 | 3.2496215157  |
| H    | 1.0    | 3.0696800616  | -0.9097102098 | 3.2171593352  |
| H    | 1.0    | -3.0672826217 | 0.9063055302  | 3.2180135365  |
| H    | 1.0    | 3.2069460849  | 0.8709730953  | 3.2502509759  |
| C    | 6.0    | -4.7856851611 | 0.0145675147  | 0.5847544627  |
| C    | 6.0    | 4.7856811509  | -0.0135415750 | 0.5849845372  |
| C    | 6.0    | -6.1222161703 | 0.0144263462  | 0.9770004756  |
| C    | 6.0    | 6.1221646242  | -0.0125201751 | 0.9774267689  |
| H    | 1.0    | -6.4206485172 | 0.0216049804  | 2.0197067201  |
| H    | 1.0    | 6.4203505964  | -0.0197516199 | 2.0201927264  |
| C    | 6.0    | -7.0878746893 | 0.0012130161  | -0.0370844610 |
| C    | 6.0    | 7.0880180136  | 0.0013967118  | -0.0364588249 |
| H    | 1.0    | -8.1393304226 | 0.0004691117  | 0.2356105196  |
| H    | 1.0    | 8.1394210085  | 0.0027465390  | 0.2364878923  |
| C    | 6.0    | -6.7213807776 | -0.0120171557 | -1.3870466248 |
| C    | 6.0    | 6.7217145969  | 0.0144984575  | -1.3864633954 |
| H    | 1.0    | -7.4893171309 | -0.0221882184 | -2.1550515708 |
| H    | 1.0    | 7.4897818058  | 0.0251731628  | -2.1543330473 |
| C    | 6.0    | -5.3683583389 | -0.0135462258 | -1.7566442146 |
| C    | 6.0    | 5.3687420888  | 0.0151974166  | -1.7563355076 |
| H    | 1.0    | -5.0879398162 | -0.0252596357 | -2.8066152655 |
| H    | 1.0    | 5.0886294880  | 0.0267549276  | -2.8063889226 |
| C    | 6.0    | -4.4020380028 | -0.0011018843 | -0.7593765570 |
| C    | 6.0    | 4.4022353451  | 0.0020448898  | -0.7592229747 |
| C    | 6.0    | -2.8845682488 | -0.0022503238 | -0.8509577082 |
| C    | 6.0    | 2.8847686919  | 0.0022420065  | -0.8510111618 |

|   |     |               |               |               |
|---|-----|---------------|---------------|---------------|
| C | 6.0 | 2.3911559172  | 1.2876436839  | -1.5593899800 |
| C | 6.0 | -2.3907420968 | 1.2706565909  | -1.5820818507 |
| C | 6.0 | 2.3917645688  | -1.2709109687 | -1.5822563746 |
| C | 6.0 | -2.3915439069 | -1.2878190273 | -1.5594765800 |
| H | 1.0 | 2.7309710439  | 2.1836555069  | -1.0306399675 |
| H | 1.0 | -2.7306174450 | 2.1759595390  | -1.0694538230 |
| H | 1.0 | 2.7315553624  | -2.1760151691 | -1.0691951350 |
| H | 1.0 | -2.7324702720 | -2.1837832804 | -1.0313739202 |
| H | 1.0 | 2.7901718315  | 1.3181156793  | -2.5785385266 |
| H | 1.0 | -2.7896724971 | 1.2830844388  | -2.6016692895 |
| H | 1.0 | 2.7913376544  | -1.2834752322 | -2.6015872662 |
| H | 1.0 | -2.7898603722 | -1.3175772120 | -2.5789183756 |
| H | 1.0 | 1.2999687206  | 1.3224305951  | -1.6247745891 |
| H | 1.0 | -1.2995114089 | 1.3042963746  | -1.6478438429 |
| H | 1.0 | 1.3005747812  | -1.3047625909 | -1.6487283003 |
| H | 1.0 | -1.3003417925 | -1.3235592723 | -1.6240076552 |

**Parent trimethine indocyanine: ORMAS-PT2-PCM/6-31G(d) energies at TDDFT-B3LYP-PCM/6-31G(d) excited state optimized structure (S1)**

$E(S0^*) = -1075.908131$

$E(S1) = -1075.827431$

COORDINATES OF ALL ATOMS ARE (ANGS)

| ATOM | CHARGE | X             | Y             | Z             |
|------|--------|---------------|---------------|---------------|
| C    | 6.0    | -0.0000056884 | -0.0009395788 | 0.4406503364  |
| H    | 1.0    | -0.0000315707 | -0.0015321189 | -0.6413017650 |
| C    | 6.0    | -1.2295689765 | 0.0057339534  | 1.1319828436  |
| C    | 6.0    | 1.2294710481  | -0.0067538340 | 1.1321306576  |
| H    | 1.0    | -1.1600269255 | 0.0087939819  | 2.2175070496  |
| H    | 1.0    | 1.1596051406  | -0.0088511281 | 2.2176092520  |
| C    | 6.0    | -2.5085910172 | 0.0084743982  | 0.5871319931  |
| C    | 6.0    | 2.5086338747  | -0.0093645143 | 0.5875528282  |
| N    | 7.0    | -3.6422092389 | 0.0210215424  | 1.3934424780  |
| N    | 7.0    | 3.6422197297  | -0.0210627823 | 1.3939878247  |
| C    | 6.0    | -3.6020302757 | 0.0390654928  | 2.8485036646  |
| C    | 6.0    | 3.6018553109  | -0.0397012320 | 2.8490444179  |
| H    | 1.0    | -4.6160053053 | 0.0771985021  | 3.2427268719  |
| H    | 1.0    | 4.6155127041  | -0.0840525838 | 3.2433703706  |
| H    | 1.0    | -3.1090817225 | -0.8633128426 | 3.2271521533  |
| H    | 1.0    | 3.0488808783  | -0.9175684692 | 3.2000192857  |
| H    | 1.0    | -3.0543606915 | 0.9199499745  | 3.2003342750  |
| H    | 1.0    | 3.1138600909  | 0.8652062354  | 3.2282733953  |
| C    | 6.0    | -4.7998130087 | 0.0136353420  | 0.6380816144  |
| C    | 6.0    | 4.7998790294  | -0.0121957221 | 0.6386847156  |
| C    | 6.0    | -6.1395200795 | 0.0173734979  | 1.0635238063  |
| C    | 6.0    | 6.1397032982  | -0.0139399430 | 1.0639549110  |
| H    | 1.0    | -6.4086996859 | 0.0257611747  | 2.1139840473  |
| H    | 1.0    | 6.4092008375  | -0.0213755419 | 2.1143264218  |
| C    | 6.0    | -7.1257338313 | 0.0080412016  | 0.0799193144  |
| C    | 6.0    | 7.1257549870  | -0.0038379572 | 0.0801414328  |
| H    | 1.0    | -8.1702074361 | 0.0104630856  | 0.3779723450  |
| H    | 1.0    | 8.1703416241  | -0.0047315490 | 0.3779113824  |
| C    | 6.0    | -6.7965978678 | -0.0048869223 | -1.2868538743 |
| C    | 6.0    | 6.7965468205  | 0.0080299665  | -1.2866437257 |
| H    | 1.0    | -7.5875794848 | -0.0119032634 | -2.0309344340 |
| H    | 1.0    | 7.5874191538  | 0.0156811565  | -2.0308391886 |
| C    | 6.0    | -5.4537809214 | -0.0092894618 | -1.6967036095 |
| C    | 6.0    | 5.4536845667  | 0.0106803872  | -1.6962687333 |
| H    | 1.0    | -5.2068586908 | -0.0197798536 | -2.7550606171 |
| H    | 1.0    | 5.2062796943  | 0.0204751635  | -2.7544906723 |
| C    | 6.0    | -4.4578632485 | -0.0003443360 | -0.7341937294 |
| C    | 6.0    | 4.4579438212  | 0.0010436835  | -0.7335967711 |
| C    | 6.0    | -2.9463583889 | -0.0028595007 | -0.8798138697 |
| C    | 6.0    | 2.9465052202  | 0.0020015476  | -0.8792828037 |
| C    | 6.0    | 2.4771169200  | 1.2831770108  | -1.6191409583 |
| C    | 6.0    | -2.4760438473 | 1.2666120141  | -1.6394666296 |

|   |     |               |               |               |
|---|-----|---------------|---------------|---------------|
| C | 6.0 | 2.4775313719  | -1.2682439269 | -1.6384159902 |
| C | 6.0 | -2.4778384481 | -1.2844756177 | -1.6195107558 |
| H | 1.0 | 2.8076194976  | 2.1836856808  | -1.0921604717 |
| H | 1.0 | -2.8051236377 | 2.1755628921  | -1.1263027400 |
| H | 1.0 | 2.8073783459  | -2.1765278507 | -1.1245289102 |
| H | 1.0 | -2.8088720278 | -2.1848190214 | -1.0926104305 |
| H | 1.0 | 2.8980298353  | 1.3008657505  | -2.6302533940 |
| H | 1.0 | -2.8976382654 | 1.2691269790  | -2.6504589265 |
| H | 1.0 | 2.8994251807  | -1.2710203795 | -2.6492821006 |
| H | 1.0 | -2.8986793944 | -1.3019197373 | -2.6306590068 |
| H | 1.0 | 1.3874282558  | 1.3186115410  | -1.7073923421 |
| H | 1.0 | -1.3863340926 | 1.2994066214  | -1.7289303824 |
| H | 1.0 | 1.3878830005  | -1.3021382928 | -1.7281577987 |
| H | 1.0 | -1.3881568695 | -1.3205722060 | -1.7076782975 |

**Conformationally restrained trimethine indocyanine: ORMAS-PT2-PCM/6-31G(d) energies at B3LYP-PCM/6-31G(d) ground state optimized structure (S0)**

$E(S0) = -1304.133837$

$E(S1^*) = -1304.047796$

COORDINATES OF ALL ATOMS ARE (ANGS)

| ATOM | CHARGE | X             | Y             | Z             |
|------|--------|---------------|---------------|---------------|
| C    | 6.0    | 0.0008166425  | -0.0054500465 | 0.6180144095  |
| H    | 1.0    | 0.0007352187  | -0.0659593140 | -0.4612330619 |
| C    | 6.0    | -1.2236875377 | 0.0186581811  | 1.2955270012  |
| C    | 6.0    | 1.2255232447  | 0.0214678347  | 1.2952769965  |
| C    | 6.0    | -2.4764760165 | -0.0165194543 | 0.6693601379  |
| C    | 6.0    | 2.4781057235  | -0.0148154590 | 0.6689228133  |
| N    | 7.0    | -3.6201083197 | -0.0448669782 | 1.3955536357  |
| N    | 7.0    | 3.6221106600  | -0.0369487017 | 1.3949127140  |
| C    | 6.0    | -4.7666151367 | -0.0177580026 | 0.5754041751  |
| C    | 6.0    | 4.7683030156  | -0.0151721515 | 0.5742514637  |
| C    | 6.0    | -6.1056458671 | -0.0095792551 | 0.9570969852  |
| C    | 6.0    | 6.1075162605  | -0.0041075052 | 0.9552882847  |
| H    | 1.0    | -6.4077831320 | -0.0160031696 | 1.9990301168  |
| H    | 1.0    | 6.4100214696  | -0.0031405232 | 1.9971172031  |
| C    | 6.0    | -7.0591049659 | 0.0150039846  | -0.0685580779 |
| C    | 6.0    | 7.0606497838  | 0.0129298973  | -0.0707900046 |
| H    | 1.0    | -8.1141283089 | 0.0228791087  | 0.1899031472  |
| H    | 1.0    | 8.1157275714  | 0.0225565494  | 0.1874336887  |
| C    | 6.0    | -6.6744006292 | 0.0318102581  | -1.4136075467 |
| C    | 6.0    | 6.6754792183  | 0.0200607527  | -1.4157629586 |
| H    | 1.0    | -7.4331132398 | 0.0509139718  | -2.1905860771 |
| H    | 1.0    | 7.4339068438  | 0.0335604516  | -2.1931297621 |
| C    | 6.0    | -5.3167911424 | 0.0269416363  | -1.7697823913 |
| C    | 6.0    | 5.3177182307  | 0.0126275182  | -1.7714245540 |
| H    | 1.0    | -5.0264902946 | 0.0421277308  | -2.8169844557 |
| H    | 1.0    | 5.0272310230  | 0.0202251283  | -2.8186627670 |
| C    | 6.0    | -4.3619379302 | 0.0049670685  | -0.7618359738 |
| C    | 6.0    | 4.3631764558  | -0.0022803056 | -0.7630219313 |
| C    | 6.0    | -2.8410556413 | -0.0038043788 | -0.8281654000 |
| C    | 6.0    | 2.8422572657  | -0.0113630375 | -0.8288173515 |
| C    | 6.0    | 2.3307520782  | 1.2646220697  | -1.5401843730 |
| C    | 6.0    | -2.3290023624 | 1.2757885953  | -1.5323891078 |
| C    | 6.0    | 2.3499882811  | -1.2948843959 | -1.5428438334 |
| C    | 6.0    | -2.3496349991 | -1.2836035458 | -1.5496710189 |
| H    | 1.0    | 2.6729742335  | 2.1671027624  | -1.0241853336 |
| H    | 1.0    | -2.6717703200 | 2.1755988560  | -1.0121196149 |
| H    | 1.0    | 2.6972103505  | -2.1926920566 | -1.0220517185 |
| H    | 1.0    | -2.6976744628 | -2.1841779626 | -1.0342501636 |
| H    | 1.0    | 2.7151348148  | 1.2885820253  | -2.5651362160 |
| H    | 1.0    | -2.7123277716 | 1.3049342432  | -2.5575990981 |
| H    | 1.0    | 2.7443508943  | -1.3162471339 | -2.5640761197 |
| H    | 1.0    | -2.7439131566 | -1.2986295623 | -2.5710522284 |

|   |     |               |               |               |
|---|-----|---------------|---------------|---------------|
| H | 1.0 | 1.2386942202  | 1.2929991219  | -1.5903141949 |
| H | 1.0 | -1.2368932296 | 1.3044886469  | -1.5811131497 |
| H | 1.0 | 1.2588575463  | -1.3353277596 | -1.6041052196 |
| H | 1.0 | -1.2585459229 | -1.3247125889 | -1.6110498568 |
| C | 6.0 | 3.6775822471  | -0.0755135784 | 2.8613795946  |
| C | 6.0 | 1.1828192944  | 0.0754576333  | 2.8193612574  |
| C | 6.0 | -1.1824069047 | 0.0675326603  | 2.8198282060  |
| C | 6.0 | -3.6762889374 | -0.0998184665 | 2.8614699519  |
| C | 6.0 | -2.3753647717 | -0.6685763661 | 3.4200936994  |
| C | 6.0 | 2.3805999942  | -0.6484744394 | 3.4246303576  |
| O | 8.0 | 0.0022638353  | -0.5498219058 | 3.3120977639  |
| H | 1.0 | 4.5285543267  | -0.6977145963 | 3.1493832495  |
| H | 1.0 | 3.8622452485  | 0.9405875340  | 3.2311045833  |
| H | 1.0 | 2.3061885027  | -1.7162380288 | 3.1893247477  |
| H | 1.0 | 2.3784287912  | -0.5395381288 | 4.5130359357  |
| H | 1.0 | 1.1895074649  | 1.1290875800  | 3.1484054274  |
| H | 1.0 | -4.5225578946 | -0.7321356274 | 3.1415431132  |
| H | 1.0 | -3.8698850784 | 0.9103708323  | 3.2425117842  |
| H | 1.0 | -2.2940397008 | -1.7340493250 | 3.1768668559  |
| H | 1.0 | -2.3737232508 | -0.5676405123 | 4.5092754099  |
| H | 1.0 | -1.1986594454 | 1.1199206802  | 3.1527579505  |



**Conformationally restrained trimethine indocyanine: ORMAS-PT2-PCM/6-31G(d) energies at TDDFT-B3LYP-PCM/6-31G(d) excited state optimized structure (S1)**

$E(S0^*) = -1304.129094$

$E(S1) = -1304.049637$

COORDINATES OF ALL ATOMS ARE (ANGS)

| ATOM | CHARGE | X             | Y             | Z             |
|------|--------|---------------|---------------|---------------|
| C    | 6.0    | 0.0006374074  | -0.0421266796 | 0.5695517172  |
| H    | 1.0    | 0.0005128640  | -0.1022603638 | -0.5089235339 |
| C    | 6.0    | -1.2341746503 | -0.0142033489 | 1.2559476479  |
| C    | 6.0    | 1.2355207561  | -0.0166723519 | 1.2555444821  |
| C    | 6.0    | -2.4921266363 | -0.0266665401 | 0.6463839773  |
| C    | 6.0    | 2.4934498787  | -0.0284237868 | 0.6456237419  |
| N    | 7.0    | -3.6533127807 | -0.0381662348 | 1.4066318721  |
| N    | 7.0    | 3.6546683140  | -0.0448067279 | 1.4056411357  |
| C    | 6.0    | -4.7838375885 | -0.0061296802 | 0.6163272970  |
| C    | 6.0    | 4.7850498604  | -0.0081681349 | 0.6153288584  |
| C    | 6.0    | -6.1318131635 | 0.0158113944  | 1.0096780629  |
| C    | 6.0    | 6.1330155400  | 0.0118572514  | 1.0087773581  |
| H    | 1.0    | -6.4222460496 | 0.0208187203  | 2.0547658208  |
| H    | 1.0    | 6.4231796776  | 0.0109948786  | 2.0539283469  |
| C    | 6.0    | -7.0899947773 | 0.0396113908  | -0.0021378837 |
| C    | 6.0    | 7.0912502530  | 0.0415637667  | -0.0028085105 |
| H    | 1.0    | -8.1427922393 | 0.0576030320  | 0.2647325006  |
| H    | 1.0    | 8.1440036569  | 0.0584111984  | 0.2643754125  |
| C    | 6.0    | -6.7205038146 | 0.0442725164  | -1.3581804925 |
| C    | 6.0    | 6.7217073920  | 0.0536499220  | -1.3587689806 |
| H    | 1.0    | -7.4899566671 | 0.0636617829  | -2.1243423012 |
| H    | 1.0    | 7.4911879053  | 0.0775206046  | -2.1247812597 |
| C    | 6.0    | -5.3663922159 | 0.0269672906  | -1.7324185761 |
| C    | 6.0    | 5.3675809263  | 0.0381151599  | -1.7331880821 |
| H    | 1.0    | -5.0917260138 | 0.0329681234  | -2.7838833657 |
| H    | 1.0    | 5.0930660026  | 0.0498187355  | -2.7846414330 |
| C    | 6.0    | -4.3977704767 | 0.0042637489  | -0.7422994737 |
| C    | 6.0    | 4.3989305754  | 0.0098804092  | -0.7431747868 |
| C    | 6.0    | -2.8800807972 | -0.0185858909 | -0.8371777238 |
| C    | 6.0    | 2.8812223673  | -0.0127313606 | -0.8379241305 |
| C    | 6.0    | 2.3700292579  | 1.2598967555  | -1.5639322116 |
| C    | 6.0    | -2.3693162671 | 1.2504234293  | -1.5699263585 |
| C    | 6.0    | 2.4133427459  | -1.2926662552 | -1.5825954742 |
| C    | 6.0    | -2.4118356610 | -1.3021050104 | -1.5753733836 |
| H    | 1.0    | 2.7008257237  | 2.1660605725  | -1.0470402519 |
| H    | 1.0    | -2.6997770469 | 2.1592515352  | -1.0575467532 |
| H    | 1.0    | 2.7636897725  | -2.1942916724 | -1.0706448453 |
| H    | 1.0    | -2.7631795181 | -2.2012645357 | -1.0598058023 |
| H    | 1.0    | 2.7630689091  | 1.2827727438  | -2.5860372505 |
| H    | 1.0    | -2.7629189973 | 1.2680776915  | -2.5919222451 |
| H    | 1.0    | 2.8184058224  | -1.2944935471 | -2.6003301078 |
| H    | 1.0    | -2.8155757466 | -1.3083965189 | -2.5936201703 |

|   |     |               |               |               |
|---|-----|---------------|---------------|---------------|
| H | 1.0 | 1.2780945885  | 1.2786714233  | -1.6226207338 |
| H | 1.0 | -1.2774194061 | 1.2689626316  | -1.6293648765 |
| H | 1.0 | 1.3230987722  | -1.3414471435 | -1.6550554043 |
| H | 1.0 | -1.3215294394 | -1.3516973775 | -1.6460812569 |
| C | 6.0 | 3.6733002847  | -0.0706556091 | 2.8689563419  |
| C | 6.0 | 1.1808114431  | 0.0294360374  | 2.7781672826  |
| C | 6.0 | -1.1780071959 | 0.0352172370  | 2.7784429578  |
| C | 6.0 | -3.6708941630 | -0.0533002383 | 2.8700728965  |
| C | 6.0 | -2.3789459712 | -0.6659484916 | 3.4035868498  |
| C | 6.0 | 2.3787407004  | -0.6801988427 | 3.3996987320  |
| O | 8.0 | 0.0000118494  | -0.5974323329 | 3.2628658148  |
| H | 1.0 | 4.5383635867  | -0.6556220480 | 3.1918717309  |
| H | 1.0 | 3.8031261028  | 0.9551391876  | 3.2408418588  |
| H | 1.0 | 2.3314838065  | -1.7472041073 | 3.1542127063  |
| H | 1.0 | 2.3504364294  | -0.5797040096 | 4.4886133400  |
| H | 1.0 | 1.1786773074  | 1.0868195581  | 3.1012153724  |
| H | 1.0 | -4.5387257027 | -0.6312823216 | 3.1979186410  |
| H | 1.0 | -3.7949293361 | 0.9759769688  | 3.2342295923  |
| H | 1.0 | -2.3365718202 | -1.7343066938 | 3.1631312892  |
| H | 1.0 | -2.3498950604 | -0.5605192201 | 4.4920249828  |
| H | 1.0 | -1.1688368968 | 1.0932204281  | 3.0991181390  |

**Parent pentamethine indocyanine: ORMAS-PT2-PCM/6-31G(d) energies at B3LYP-PCM/6-31G(d) ground state optimized structure (S0)**

$E(S0) = -1153.054405$

$E(S1^*) = -1152.977672$

COORDINATES OF ALL ATOMS ARE (ANGS)

| ATOM | CHARGE | X             | Y             | Z             |
|------|--------|---------------|---------------|---------------|
| C    | 6.0    | 0.0000249895  | 0.0000057691  | -1.2171622622 |
| H    | 1.0    | -0.0000423590 | 0.0000039732  | -2.3068400212 |
| C    | 6.0    | -1.2248715853 | 0.0000077208  | -0.5480106122 |
| C    | 6.0    | 1.2250553721  | 0.0000046925  | -0.5481961016 |
| H    | 1.0    | -1.1906512972 | 0.0000085008  | 0.5383239010  |
| H    | 1.0    | 1.1909131901  | 0.0000074279  | 0.5381369072  |
| C    | 6.0    | -2.4641536855 | 0.0000088693  | -1.1983777432 |
| C    | 6.0    | 2.4642303216  | -0.0000009197 | -1.1987176656 |
| H    | 1.0    | -2.4394031669 | 0.0000094849  | -2.2847333237 |
| H    | 1.0    | 2.4393738225  | -0.0000044081 | -2.2850529676 |
| C    | 6.0    | -3.7199901825 | 0.0000068027  | -0.5918170071 |
| C    | 6.0    | 3.7201200223  | -0.0000025682 | -0.5922121561 |
| N    | 7.0    | -4.8640630794 | 0.0000154696  | -1.3235352893 |
| N    | 7.0    | 4.8642210092  | -0.0000153804 | -1.3238482537 |
| C    | 6.0    | -4.9071809667 | 0.0000372600  | -2.7828389096 |
| C    | 6.0    | 4.9073491037  | -0.0000340182 | -2.7831769157 |
| H    | 1.0    | -5.9444316750 | 0.0000833784  | -3.1119130059 |
| H    | 1.0    | 5.9446180727  | -0.0000739389 | -3.1122109781 |
| H    | 1.0    | -4.4123830266 | 0.8929977720  | -3.1770778474 |
| H    | 1.0    | 4.4126526364  | 0.8929576536  | -3.1774466652 |
| H    | 1.0    | -4.4124515402 | -0.8929482057 | -3.1771056465 |
| H    | 1.0    | 4.4125926747  | -0.8930032613 | -3.1774232753 |
| C    | 6.0    | -6.0105913580 | 0.0000014057  | -0.4977769392 |
| C    | 6.0    | 6.0107550101  | -0.0000083186 | -0.4980034081 |
| C    | 6.0    | -7.3546686289 | -0.0000007647 | -0.8645925755 |
| C    | 6.0    | 7.3549259034  | -0.0000142080 | -0.8645438273 |
| H    | 1.0    | -7.6723801138 | 0.0000054174  | -1.9016560999 |
| H    | 1.0    | 7.6730497715  | -0.0000229384 | -1.9014712170 |
| C    | 6.0    | -8.3015722646 | -0.0000135828 | 0.1669613404  |
| C    | 6.0    | 8.3015759632  | -0.0000072613 | 0.1672651940  |
| H    | 1.0    | -9.3578742002 | -0.0000155037 | -0.0868108313 |
| H    | 1.0    | 9.3579595979  | -0.0000118587 | -0.0861420825 |
| C    | 6.0    | -7.9103431263 | -0.0000245263 | 1.5098770887  |
| C    | 6.0    | 7.9100899888  | 0.0000057476  | 1.5101197534  |
| H    | 1.0    | -8.6640389732 | -0.0000344021 | 2.2919704571  |
| H    | 1.0    | 8.6636444841  | 0.0000108451  | 2.2923573727  |
| C    | 6.0    | -6.5502526868 | -0.0000235885 | 1.8541689412  |
| C    | 6.0    | 6.5499564985  | 0.0000127284  | 1.8541025601  |
| H    | 1.0    | -6.2508241730 | -0.0000327886 | 2.8990026024  |
| H    | 1.0    | 6.2501306977  | 0.0000233311  | 2.8988151224  |
| C    | 6.0    | -5.6017596370 | -0.0000108853 | 0.8397185013  |
| C    | 6.0    | 5.6017244018  | 0.0000057994  | 0.8394351852  |

|   |     |               |               |              |
|---|-----|---------------|---------------|--------------|
| C | 6.0 | -4.0825757406 | -0.0000067388 | 0.9030877048 |
| C | 6.0 | 4.0825641641  | 0.0000107182  | 0.9026924212 |
| C | 6.0 | -3.5725172978 | 1.2781615978  | 1.6137935556 |
| C | 6.0 | 3.5724148528  | 1.2781356155  | 1.6134201011 |
| C | 6.0 | -3.5725090643 | -1.2781824556 | 1.6137735446 |
| C | 6.0 | 3.5724073332  | -1.2780966822 | 1.6134464706 |
| H | 1.0 | -3.9221529216 | 2.1794846390  | 1.1002695515 |
| H | 1.0 | 3.9221411586  | 2.1795327539  | 1.1001046918 |
| H | 1.0 | -3.9221399462 | -2.1794999191 | 1.1002359239 |
| H | 1.0 | 3.9221260801  | -2.1795059766 | 1.1001477984 |
| H | 1.0 | -3.9526444948 | 1.2999673338  | 2.6406449758 |
| H | 1.0 | 3.9523494293  | 1.2997817761  | 2.6403461946 |
| H | 1.0 | -3.9526348367 | -1.3000067468 | 2.6406251314 |
| H | 1.0 | 3.9523446805  | -1.2997247072 | 2.6403718282 |
| H | 1.0 | -2.4802825065 | 1.3084773708  | 1.6566744757 |
| H | 1.0 | 2.4801775206  | 1.3084540701  | 1.6561038778 |
| H | 1.0 | -2.4802741138 | -1.3084922029 | 1.6566520474 |
| H | 1.0 | 2.4801698959  | -1.3084071668 | 1.6561345359 |

**Parent pentamethine indocyanine: ORMAS-PT2-PCM/6-31G(d) energies at TDDFT-B3LYP-PCM/6-31G(d) excited state optimized structure (S1)**

$E(S0^*) = -1153.051169$

$E(S1) = -1152.978818$

COORDINATES OF ALL ATOMS ARE (ANGS)

| ATOM | CHARGE | X             | Y             | Z             |
|------|--------|---------------|---------------|---------------|
| C    | 6.0    | 0.0000064308  | 0.0000204589  | -1.0637873638 |
| H    | 1.0    | -0.0000594544 | 0.0000189792  | -2.1546520768 |
| C    | 6.0    | -1.2377552881 | 0.0000278495  | -0.4078216402 |
| C    | 6.0    | 1.2378082981  | 0.0000119981  | -0.4079728280 |
| H    | 1.0    | -1.2267198072 | 0.0000265762  | 0.6782200849  |
| H    | 1.0    | 1.2268085181  | 0.0000156605  | 0.6780655325  |
| C    | 6.0    | -2.4675740674 | 0.0000355956  | -1.0976805972 |
| C    | 6.0    | 2.4676131854  | -0.0000063101 | -1.0979017436 |
| H    | 1.0    | -2.4027285356 | 0.0000447733  | -2.1834342684 |
| H    | 1.0    | 2.4028697960  | -0.0000149965 | -2.1836848977 |
| C    | 6.0    | -3.7431038807 | 0.0000286264  | -0.5440011387 |
| C    | 6.0    | 3.7430954998  | -0.0000142524 | -0.5441533812 |
| N    | 7.0    | -4.8775191499 | 0.0000527239  | -1.3344768287 |
| N    | 7.0    | 4.8775579049  | -0.0000544273 | -1.3345236920 |
| C    | 6.0    | -4.8532725147 | 0.0001101292  | -2.7908262663 |
| C    | 6.0    | 4.8536201982  | -0.0001128120 | -2.7908692005 |
| H    | 1.0    | -5.8722674350 | 0.0002305978  | -3.1737275019 |
| H    | 1.0    | 5.8727178815  | -0.0002653406 | -3.1735409456 |
| H    | 1.0    | -4.3371000328 | 0.8923141053  | -3.1614657370 |
| H    | 1.0    | 4.3379076532  | 0.8921990666  | -3.1618553846 |
| H    | 1.0    | -4.3372724061 | -0.8921601728 | -3.1615462973 |
| H    | 1.0    | 4.3376837160  | -0.8923301170 | -3.1617711275 |
| C    | 6.0    | -6.0347640839 | 0.0000107893  | -0.5658400999 |
| C    | 6.0    | 6.0347646317  | -0.0000273064 | -0.5658410457 |
| C    | 6.0    | -7.3748536600 | 0.0000012366  | -0.9800275447 |
| C    | 6.0    | 7.3747754245  | -0.0000357184 | -0.9801308035 |
| H    | 1.0    | -7.6536447829 | 0.0000225951  | -2.0281073012 |
| H    | 1.0    | 7.6534332314  | -0.0000602679 | -2.0282613126 |
| C    | 6.0    | -8.3544374995 | -0.0000428088 | 0.0132191394  |
| C    | 6.0    | 8.3544340602  | -0.0000047666 | 0.0130260497  |
| H    | 1.0    | -9.4012857132 | -0.0000516511 | -0.2768284592 |
| H    | 1.0    | 9.4012228220  | -0.0000102461 | -0.2771449741 |
| C    | 6.0    | -8.0138059148 | -0.0000775606 | 1.3750071424  |
| C    | 6.0    | 8.0138187403  | 0.0000346108  | 1.3748086783  |
| H    | 1.0    | -8.7976701281 | -0.0001116817 | 2.1267419042  |
| H    | 1.0    | 8.7976929924  | 0.0000580217  | 2.1265283811  |
| C    | 6.0    | -6.6673095404 | -0.0000703281 | 1.7719962309  |
| C    | 6.0    | 6.6673396407  | 0.0000461125  | 1.7718794042  |
| H    | 1.0    | -6.4095753635 | -0.0000993993 | 2.8278682905  |
| H    | 1.0    | 6.4098663316  | 0.0000788451  | 2.8278389318  |
| C    | 6.0    | -5.6801726510 | -0.0000275238 | 0.7991042138  |
| C    | 6.0    | 5.6801274027  | 0.0000165814  | 0.7990788248  |

|   |     |               |               |              |
|---|-----|---------------|---------------|--------------|
| C | 6.0 | -4.1668604253 | -0.0000132601 | 0.9286047773 |
| C | 6.0 | 4.1667805121  | 0.0000237115  | 0.9285370480 |
| C | 6.0 | -3.6877014164 | 1.2758495511  | 1.6702689549 |
| C | 6.0 | 3.6874687622  | 1.2758179686  | 1.6702806922 |
| C | 6.0 | -3.6876725834 | -1.2758997955 | 1.6702078171 |
| C | 6.0 | 3.6874629256  | -1.2757303726 | 1.6703478644 |
| H | 1.0 | -4.0228468803 | 2.1798573470  | 1.1519652136 |
| H | 1.0 | 4.0226931579  | 2.1799906036  | 1.1523473212 |
| H | 1.0 | -4.0228017689 | -2.1798902768 | 1.1518632333 |
| H | 1.0 | 4.0226813622  | -2.1799313974 | 1.1524605415 |
| H | 1.0 | -4.1006382485 | 1.2880680891  | 2.6848625076 |
| H | 1.0 | 4.1001222748  | 1.2877808388  | 2.6849950803 |
| H | 1.0 | -4.1006054228 | -1.2881736197 | 2.6848022469 |
| H | 1.0 | 4.1001188488  | -1.2876428860 | 2.6850618716 |
| H | 1.0 | -2.5973157136 | 1.3080034261  | 1.7481333745 |
| H | 1.0 | 2.5970670214  | 1.3079395817  | 1.7478506745 |
| H | 1.0 | -2.5972860597 | -1.3080353466 | 1.7480667164 |
| H | 1.0 | 2.5970612036  | -1.3078424040 | 1.7479218434 |

**Conformationally restrained pentamethine indocyanine: ORMAS-PT2-PCM/6-31G(d) energies at B3LYP-PCM/6-31G(d) ground state optimized structure (S0)**

$E(S0) = -1458.455336$

$E(S1^*) = -1458.381840$

COORDINATES OF ALL ATOMS ARE (ANGS)

| ATOM | CHARGE | X             | Y             | Z             |
|------|--------|---------------|---------------|---------------|
| C    | 6.0    | 0.0084592318  | -0.0735953366 | -1.2750030347 |
| C    | 6.0    | -1.2309211688 | -0.0314351507 | -0.6264955978 |
| C    | 6.0    | 1.2136833410  | -0.0359358058 | -0.5702298260 |
| H    | 1.0    | -1.2146573541 | -0.0111144271 | 0.4582388048  |
| H    | 1.0    | 1.1668413111  | 0.0145488586  | 0.5130170549  |
| C    | 6.0    | -2.4577156391 | -0.0099901840 | -1.3039325188 |
| C    | 6.0    | 2.4526001867  | -0.0326118597 | -1.2263042975 |
| C    | 6.0    | -3.6927007969 | 0.0224394277  | -0.6403351511 |
| C    | 6.0    | 3.6926978567  | 0.0143334967  | -0.5844191711 |
| N    | 7.0    | -4.8621570978 | 0.0640186861  | -1.3279187227 |
| N    | 7.0    | 4.8502286557  | 0.0678623437  | -1.2937034492 |
| C    | 6.0    | -5.9795269358 | 0.0450439094  | -0.4712274671 |
| C    | 6.0    | 5.9810576253  | 0.0474773298  | -0.4553272218 |
| C    | 6.0    | -7.3309183308 | 0.0520837297  | -0.8090779030 |
| C    | 6.0    | 7.3267393725  | 0.0610410621  | -0.8143655933 |
| H    | 1.0    | -7.6665932836 | 0.0656009323  | -1.8406460376 |
| H    | 1.0    | 7.6453710470  | 0.0829505827  | -1.8512517064 |
| C    | 6.0    | -8.2513418929 | 0.0338690428  | 0.2461424540  |
| C    | 6.0    | 8.2640807574  | 0.0377278338  | 0.2261054521  |
| H    | 1.0    | -9.3141387120 | 0.0382082027  | 0.0208899049  |
| H    | 1.0    | 9.3231606746  | 0.0460928094  | -0.0157994070 |
| C    | 6.0    | -7.8239886419 | 0.0074098425  | 1.5779945328  |
| C    | 6.0    | 7.8583407903  | 0.0013576942  | 1.5644136663  |
| H    | 1.0    | -8.5575613023 | -0.0065790259 | 2.3789247391  |
| H    | 1.0    | 8.6046835031  | -0.0164282416 | 2.3533871721  |
| C    | 6.0    | -6.4552393163 | -0.0043270200 | 1.8901251827  |
| C    | 6.0    | 6.4946978683  | -0.0156216461 | 1.8981993843  |
| H    | 1.0    | -6.1322363216 | -0.0276888162 | 2.9276809338  |
| H    | 1.0    | 6.1880124546  | -0.0464332110 | 2.9404850808  |
| C    | 6.0    | -5.5322996080 | 0.0121390429  | 0.8525886003  |
| C    | 6.0    | 5.5551337371  | 0.0044511390  | 0.8759997081  |
| C    | 6.0    | -4.0099052604 | 0.0007030535  | 0.8695237341  |
| C    | 6.0    | 4.0330011833  | -0.0089508148 | 0.9180517699  |
| C    | 6.0    | -3.4778229679 | 1.2657208533  | 1.5889339295  |
| C    | 6.0    | 3.5071877054  | 1.2546180078  | 1.6444837336  |
| C    | 6.0    | -3.4979783398 | -1.2929070403 | 1.5501167810  |
| C    | 6.0    | 3.5229722921  | -1.3012573922 | 1.6007340775  |
| H    | 1.0    | -3.8318416324 | 2.1759813312  | 1.0944605774  |
| H    | 1.0    | 3.8523402821  | 2.1663415231  | 1.1465186907  |
| H    | 1.0    | -3.8644233500 | -2.1824729458 | 1.0278373290  |
| H    | 1.0    | 3.8877255508  | -2.1918002996 | 1.0789892730  |
| H    | 1.0    | -3.8410752816 | 1.2748854295  | 2.6221616442  |

|   |     |               |               |               |
|---|-----|---------------|---------------|---------------|
| H | 1.0 | 3.8818118520  | 1.2640766349  | 2.6736293521  |
| H | 1.0 | -3.8632201193 | -1.3278421121 | 2.5820303042  |
| H | 1.0 | 3.8879359169  | -1.3357361555 | 2.6327823125  |
| H | 1.0 | -2.3851458810 | 1.2915524655  | 1.6149841365  |
| H | 1.0 | 2.4145970743  | 1.2757535450  | 1.6823543967  |
| H | 1.0 | -2.4059864527 | -1.3353110582 | 1.5770375548  |
| H | 1.0 | 2.4305607587  | -1.3405330374 | 1.6263718857  |
| C | 6.0 | -4.9660338057 | 0.1202122127  | -2.7896993008 |
| C | 6.0 | 4.9248529042  | 0.1367118639  | -2.7572259254 |
| C | 6.0 | 0.0615581425  | -0.1140296778 | -2.7895431296 |
| C | 6.0 | 2.4301875880  | -0.0681923673 | -2.7540782171 |
| C | 6.0 | -2.4511884657 | -0.0186887278 | -2.8350970127 |
| C | 6.0 | -3.6881181551 | 0.7061497509  | -3.3813508652 |
| C | 6.0 | -1.1520427341 | 0.5890281078  | -3.3881885879 |
| C | 6.0 | 3.6224342636  | 0.6898914971  | -3.3295705741 |
| O | 8.0 | 1.2446103482  | 0.5311435533  | -3.2664248135 |
| H | 1.0 | 5.1394340519  | -0.8666313835 | -3.1460738453 |
| H | 1.0 | 5.7647233895  | 0.7845276276  | -3.0217670055 |
| H | 1.0 | 3.6388400985  | 0.5995040297  | -4.4196718527 |
| H | 1.0 | 3.5215998848  | 1.7519295973  | -3.0781434588 |
| H | 1.0 | 2.4710614402  | -1.1189246237 | -3.0920957879 |
| H | 1.0 | 0.0754322176  | -1.1644450706 | -3.1307830770 |
| H | 1.0 | -1.1308157078 | 0.5003703408  | -4.4800557498 |
| H | 1.0 | -1.0998106613 | 1.6564109570  | -3.1369923393 |
| H | 1.0 | -2.5013003842 | -1.0667324550 | -3.1715265604 |
| H | 1.0 | -3.7322343002 | 0.6187545374  | -4.4719613483 |
| H | 1.0 | -3.6287957648 | 1.7744205854  | -3.1376442718 |
| H | 1.0 | -5.1534834565 | -0.8923571584 | -3.1682880955 |
| H | 1.0 | -5.8320677155 | 0.7386665137  | -3.0407324795 |



**Conformationally restrained pentamethine indocyanine: ORMAS-PT2-PCM/6-31G(d) energies at TDDFT-B3LYP-PCM/6-31G(d) excited state optimized structure (S1)**

$E(S0^*) = -1458.452623$

$E(S1) = -1458.382597$

COORDINATES OF ALL ATOMS ARE (ANGS)

| ATOM | CHARGE | X             | Y             | Z             |
|------|--------|---------------|---------------|---------------|
| C    | 6.0    | 0.0081819881  | -0.0145058967 | -1.2157979673 |
| C    | 6.0    | -1.2406223584 | 0.0027524542  | -0.5743874880 |
| C    | 6.0    | 1.2257423404  | 0.0175268663  | -0.5151223925 |
| H    | 1.0    | -1.2347621361 | 0.0134315313  | 0.5100217677  |
| H    | 1.0    | 1.1883540900  | 0.0665734824  | 0.5678598978  |
| C    | 6.0    | -2.4732465529 | 0.0164905124  | -1.2675684236 |
| C    | 6.0    | 2.4665800447  | 0.0101197357  | -1.1863119680 |
| C    | 6.0    | -3.7174911155 | 0.0304347844  | -0.6244817832 |
| C    | 6.0    | 3.7185066510  | 0.0285787437  | -0.5654955080 |
| N    | 7.0    | -4.8946664225 | 0.0479081925  | -1.3432486799 |
| N    | 7.0    | 4.8811185548  | 0.0620920324  | -1.3067886467 |
| C    | 6.0    | -6.0079338727 | 0.0190205500  | -0.5175314761 |
| C    | 6.0    | 6.0088634097  | 0.0239505315  | -0.5003645406 |
| C    | 6.0    | -7.3631589913 | 0.0031486667  | -0.8743707493 |
| C    | 6.0    | 7.3576330913  | 0.0169271722  | -0.8798723575 |
| H    | 1.0    | -7.6822291327 | 0.0002519527  | -1.9111246783 |
| H    | 1.0    | 7.6593412710  | 0.0322078885  | -1.9217917238 |
| C    | 6.0    | -8.2954776060 | -0.0168348937 | 0.1640497671  |
| C    | 6.0    | 8.3071082888  | -0.0197849946 | 0.1428075828  |
| H    | 1.0    | -9.3550117000 | -0.0294743521 | -0.0759192941 |
| H    | 1.0    | 9.3625855152  | -0.0274169652 | -0.1143190659 |
| C    | 6.0    | -7.8894661491 | -0.0237899201 | 1.5071353292  |
| C    | 6.0    | 7.9234636422  | -0.0499718087 | 1.4921527617  |
| H    | 1.0    | -8.6371531050 | -0.0396387273 | 2.2947713186  |
| H    | 1.0    | 8.6840830308  | -0.0785659456 | 2.2669353651  |
| C    | 6.0    | -6.5250887587 | -0.0138614831 | 1.8429787530  |
| C    | 6.0    | 6.5650030984  | -0.0465874158 | 1.8507586089  |
| H    | 1.0    | -6.2210245652 | -0.0224679565 | 2.8864271409  |
| H    | 1.0    | 6.2778172852  | -0.0723729719 | 2.8986763838  |
| C    | 6.0    | -5.5840399585 | 0.0050141136  | 0.8249861596  |
| C    | 6.0    | 5.6072095662  | -0.0124523621 | 0.8491643439  |
| C    | 6.0    | -4.0634725588 | 0.0138765670  | 0.8733247977  |
| C    | 6.0    | 4.0876885712  | -0.0004647716 | 0.9237606404  |
| C    | 6.0    | -3.5596532307 | 1.2861889222  | 1.6053671067  |
| C    | 6.0    | 3.5973220715  | 1.2692031179  | 1.6701092296  |
| C    | 6.0    | -3.5501488156 | -1.2681904644 | 1.5811993730  |
| C    | 6.0    | 3.5700125855  | -1.2824712930 | 1.6263824807  |
| H    | 1.0    | -3.9219363159 | 2.1921281642  | 1.1091031319  |
| H    | 1.0    | 3.9547832259  | 2.1775879122  | 1.1749339374  |
| H    | 1.0    | -3.9011276256 | -2.1674581204 | 1.0650999357  |
| H    | 1.0    | 3.9154258210  | -2.1815713915 | 1.1063508225  |
| H    | 1.0    | -3.9323377604 | 1.2871657495  | 2.6356060668  |

|   |     |               |               |               |
|---|-----|---------------|---------------|---------------|
| H | 1.0 | 3.9827984153  | 1.2626658882  | 2.6955706093  |
| H | 1.0 | -3.9285394808 | -1.2930842214 | 2.6089783237  |
| H | 1.0 | 3.9471205132  | -1.3139447971 | 2.6544246069  |
| H | 1.0 | -2.4676324699 | 1.3263744780  | 1.6405585610  |
| H | 1.0 | 2.5057016894  | 1.3100434866  | 1.7189356112  |
| H | 1.0 | -2.4582225869 | -1.2992477335 | 1.6224153961  |
| H | 1.0 | 2.4774931902  | -1.3052532140 | 1.6650354125  |
| C | 6.0 | -4.9615193999 | 0.0684932190  | -2.8048755923 |
| C | 6.0 | 4.9203817962  | 0.1133682796  | -2.7698158163 |
| C | 6.0 | 0.0614728268  | -0.0539707616 | -2.7288819469 |
| C | 6.0 | 2.4251006162  | -0.0266116726 | -2.7120587480 |
| C | 6.0 | -2.4456647989 | 0.0090660058  | -2.7960195617 |
| C | 6.0 | -3.6916224230 | 0.6935259758  | -3.3721327593 |
| C | 6.0 | -1.1522432821 | 0.6405272095  | -3.3338405889 |
| C | 6.0 | 3.6217935142  | 0.7045160541  | -3.3121260798 |
| O | 8.0 | 1.2426541786  | 0.5849042915  | -3.2118558906 |
| H | 1.0 | 5.0812284370  | -0.9024088362 | -3.1558865967 |
| H | 1.0 | 5.7771111442  | 0.7235932189  | -3.0678312952 |
| H | 1.0 | 3.6099699559  | 0.6132370597  | -4.4022569610 |
| H | 1.0 | 3.5543063345  | 1.7687116726  | -3.0591021872 |
| H | 1.0 | 2.4443163882  | -1.0825275105 | -3.0402776904 |
| H | 1.0 | 0.0731228125  | -1.1095712729 | -3.0593976307 |
| H | 1.0 | -1.1193672076 | 0.5562314728  | -4.4257002762 |
| H | 1.0 | -1.1169408484 | 1.7073057779  | -3.0776495020 |
| H | 1.0 | -2.4614224207 | -1.0441234943 | -3.1240922260 |
| H | 1.0 | -3.7075410509 | 0.5966454749  | -4.4628293631 |
| H | 1.0 | -3.6714395736 | 1.7648355603  | -3.1354298726 |
| H | 1.0 | -5.0892467519 | -0.9602723274 | -3.1689112650 |
| H | 1.0 | -5.8465764089 | 0.6397097468  | -3.0981698800 |

**Parent heptamethine indocyanine: ORMAS-PT2-PCM/6-31G(d) energies at B3LYP-PCM/6-31G(d) ground state optimized structure (S0)**

$E(S0) = -1230.195344$

$E(S1^*) = -1230.127389$

COORDINATES OF ALL ATOMS ARE (ANGS)

| ATOM | CHARGE | X              | Y             | Z             |
|------|--------|----------------|---------------|---------------|
| C    | 6.0    | 0.1202319192   | -0.0865120271 | -0.5365065399 |
| C    | 6.0    | -1.1214084499  | -0.0945812173 | -1.1777963159 |
| C    | 6.0    | 1.3523865762   | -0.0780320974 | -1.1957749303 |
| C    | 6.0    | -2.3337854712  | -0.1035412122 | -0.4893331669 |
| C    | 6.0    | 2.5747331635   | -0.0692996081 | -0.5251584032 |
| H    | 1.0    | -2.2835612742  | -0.1043947446 | 0.5963982325  |
| H    | 1.0    | 2.5397619200   | -0.0689223295 | 0.5612222669  |
| C    | 6.0    | -3.5841502047  | -0.1109892223 | -1.1229103965 |
| C    | 6.0    | 3.8157592789   | -0.0608082160 | -1.1767154328 |
| H    | 1.0    | -3.5719057804  | -0.1084603646 | -2.2096391114 |
| H    | 1.0    | 3.7884194410   | -0.0624525121 | -2.2631270226 |
| C    | 6.0    | -4.8313092567  | -0.1216383812 | -0.5025584493 |
| C    | 6.0    | 5.0718195146   | -0.0510773510 | -0.5745217571 |
| N    | 7.0    | -5.9859593490  | -0.1266289084 | -1.2213895797 |
| N    | 7.0    | 6.2160278429   | -0.0389730356 | -1.3098482009 |
| C    | 6.0    | -6.0460381578  | -0.1196407877 | -2.6794823704 |
| C    | 6.0    | 6.2547757577   | -0.0313612115 | -2.7687077119 |
| H    | 1.0    | -7.0871423837  | -0.1184763610 | -2.9962386791 |
| H    | 1.0    | 7.2898434871   | 0.0177936860  | -3.1012688611 |
| H    | 1.0    | -5.5551474379  | -1.0100627549 | -3.0846708676 |
| H    | 1.0    | 5.7977813286   | -0.9428450287 | -3.1669614820 |
| H    | 1.0    | -5.5565190349  | 0.7755705743  | -3.0754646042 |
| H    | 1.0    | 5.7202513640   | 0.8409667688  | -3.1569883961 |
| C    | 6.0    | -7.1212805762  | -0.1406377858 | -0.3821319358 |
| C    | 6.0    | 7.3633683558   | -0.0380691395 | -0.4869891187 |
| C    | 6.0    | -8.4699335200  | -0.1505114825 | -0.7325796138 |
| C    | 6.0    | 8.7070864019   | -0.0323485612 | -0.8560368995 |
| H    | 1.0    | -8.8002306231  | -0.1483880026 | -1.7657461137 |
| H    | 1.0    | 9.0228198466   | -0.0294756366 | -1.8937356231 |
| C    | 6.0    | -9.4045516313  | -0.1640612268 | 0.3100070479  |
| C    | 6.0    | 9.6562060954   | -0.0317971635 | 0.1735603408  |
| H    | 1.0    | -10.4637408834 | -0.1720920381 | 0.0683852831  |
| H    | 1.0    | 10.7119975814  | -0.0275604416 | -0.0824243616 |
| C    | 6.0    | -8.9976978005  | -0.1675193106 | 1.6481739903  |
| C    | 6.0    | 9.2680829334   | -0.0371493002 | 1.5173519994  |
| H    | 1.0    | -9.7420416427  | -0.1781963541 | 2.4391227487  |
| H    | 1.0    | 10.0233968801  | -0.0366254589 | 2.2979086893  |
| C    | 6.0    | -7.6334156193  | -0.1573574233 | 1.9761896791  |
| C    | 6.0    | 7.9085596174   | -0.0439326286 | 1.8641261611  |
| H    | 1.0    | -7.3217033262  | -0.1601382856 | 3.0174814149  |
| H    | 1.0    | 7.6110121079   | -0.0488348092 | 2.9095221255  |
| C    | 6.0    | -6.6968133591  | -0.1439494664 | 0.9508697944  |

|   |     |               |               |               |
|---|-----|---------------|---------------|---------------|
| C | 6.0 | 6.9578748621  | -0.0448670452 | 0.8519008856  |
| C | 6.0 | -5.1768353091 | -0.1310804453 | 0.9965930076  |
| C | 6.0 | 5.4387291675  | -0.0532212960 | 0.9193522481  |
| C | 6.0 | -4.6474677651 | -1.4072089803 | 1.6964705019  |
| C | 6.0 | 4.9374473821  | -1.3355975829 | 1.6284223509  |
| C | 6.0 | -4.6693699420 | 1.1481258083  | 1.7071795879  |
| C | 6.0 | 4.9233080749  | 1.2199161289  | 1.6351177916  |
| H | 1.0 | -4.9952645285 | -2.3096670876 | 1.1836286278  |
| H | 1.0 | 5.2910563703  | -2.2338248381 | 1.1121657320  |
| H | 1.0 | -5.0331762552 | 2.0486771029  | 1.2021621316  |
| H | 1.0 | 5.2675508484  | 2.1246899304  | 1.1239705371  |
| H | 1.0 | -5.0151740965 | -1.4362875917 | 2.7277337228  |
| H | 1.0 | 5.3194114685  | -1.3578800770 | 2.6546394068  |
| H | 1.0 | -5.0369728463 | 1.1622613003  | 2.7388140906  |
| H | 1.0 | 5.3044468395  | 1.2406415218  | 2.6616896110  |
| H | 1.0 | -3.5545389873 | -1.4280869038 | 1.7261668572  |
| H | 1.0 | 3.8454421744  | -1.3719462736 | 1.6729955036  |
| H | 1.0 | -3.5769705442 | 1.1874952719  | 1.7365930358  |
| H | 1.0 | 3.8309164875  | 1.2444258350  | 1.6791199030  |
| H | 1.0 | 0.1277944498  | -0.0867394768 | 0.5546806673  |
| H | 1.0 | -1.1416051403 | -0.0939581799 | -2.2674902444 |
| H | 1.0 | 1.3571966679  | -0.0780540440 | -2.2856701444 |

**Parent heptamethine indocyanine: ORMAS-PT2-PCM/6-31G(d) energies at TDDFT-B3LYP-PCM/6-31G(d) excited state optimized structure (S1)**

$E(S0^*) = -1230.193281$

$E(S1) = -1230.127874$

COORDINATES OF ALL ATOMS ARE (ANGS)

| ATOM | CHARGE | X              | Y             | Z             |
|------|--------|----------------|---------------|---------------|
| C    | 6.0    | 0.1217301350   | -0.0908646696 | -0.3698829340 |
| C    | 6.0    | -1.1210636339  | -0.0977134702 | -1.0195107242 |
| C    | 6.0    | 1.3546769165   | -0.0826714740 | -1.0380597416 |
| C    | 6.0    | -2.3522596810  | -0.1063063035 | -0.3567509436 |
| C    | 6.0    | 2.5955663799   | -0.0735405674 | -0.3936807809 |
| H    | 1.0    | -2.3323640260  | -0.1084398330 | 0.7294004470  |
| H    | 1.0    | 2.5910703764   | -0.0725384717 | 0.6926191210  |
| C    | 6.0    | -3.5873020948  | -0.1118514660 | -1.0343727723 |
| C    | 6.0    | 3.8204255516   | -0.0644592533 | -1.0895123611 |
| H    | 1.0    | -3.5343089409  | -0.1076377792 | -2.1206963279 |
| H    | 1.0    | 3.7511113036   | -0.0666148083 | -2.1749464395 |
| C    | 6.0    | -4.8573352303  | -0.1223653947 | -0.4666206470 |
| C    | 6.0    | 5.0985408228   | -0.0530597482 | -0.5403015579 |
| N    | 7.0    | -5.9960111820  | -0.1257825612 | -1.2410410252 |
| N    | 7.0    | 6.2263372417   | -0.0400649023 | -1.3304104208 |
| C    | 6.0    | -5.9905569409  | -0.1168928897 | -2.6981217509 |
| C    | 6.0    | 6.2002885510   | -0.0320058109 | -2.7872423300 |
| H    | 1.0    | -7.0147626137  | -0.1173532214 | -3.0666843200 |
| H    | 1.0    | 7.2181380629   | 0.0154098746  | -3.1702205471 |
| H    | 1.0    | -5.4773443076  | -1.0053380443 | -3.0813608866 |
| H    | 1.0    | 5.7221534487   | -0.9424509362 | -3.1647063346 |
| H    | 1.0    | -5.4825636585  | 0.7793106941  | -3.0699353658 |
| H    | 1.0    | 5.6472192706   | 0.8404951442  | -3.1502508399 |
| C    | 6.0    | -7.1492565621  | -0.1390484857 | -0.4573088073 |
| C    | 6.0    | 7.3903893612   | -0.0371577191 | -0.5626642210 |
| C    | 6.0    | -8.4912057378  | -0.1473381738 | -0.8576321196 |
| C    | 6.0    | 8.7267774592   | -0.0300261466 | -0.9810818913 |
| H    | 1.0    | -8.7811953747  | -0.1440237575 | -1.9027148728 |
| H    | 1.0    | 9.0026731247   | -0.0277598571 | -2.0300255073 |
| C    | 6.0    | -9.4615740186  | -0.1605771640 | 0.1465250092  |
| C    | 6.0    | 9.7107429680   | -0.0274886347 | 0.0098913069  |
| H    | 1.0    | -10.5112079563 | -0.1673018350 | -0.1334131361 |
| H    | 1.0    | 10.7564603190  | -0.0220726717 | -0.2842281953 |
| C    | 6.0    | -9.1068061292  | -0.1654733145 | 1.5031738100  |
| C    | 6.0    | 9.3743860508   | -0.0322739278 | 1.3712846003  |
| H    | 1.0    | -9.8822419064  | -0.1758317780 | 2.2635872867  |
| H    | 1.0    | 10.1600150644  | -0.0301257143 | 2.1212245644  |
| C    | 6.0    | -7.7561071685  | -0.1570583048 | 1.8851611111  |
| C    | 6.0    | 8.0290836712   | -0.0405600690 | 1.7714342800  |
| H    | 1.0    | -7.4864461194  | -0.1610223520 | 2.9380788200  |
| H    | 1.0    | 7.7737656491   | -0.0448398479 | 2.8279690266  |
| C    | 6.0    | -6.7796406164  | -0.1438797267 | 0.9006600740  |

|   |     |               |               |               |
|---|-----|---------------|---------------|---------------|
| C | 6.0 | 7.0394135178  | -0.0434775594 | 0.8002671445  |
| C | 6.0 | -5.2644806250 | -0.1327919706 | 1.0119272492  |
| C | 6.0 | 5.5259112333  | -0.0529344927 | 0.9324234017  |
| C | 6.0 | -4.7665086152 | -1.4087718917 | 1.7394914622  |
| C | 6.0 | 5.0560187338  | -1.3327596141 | 1.6717981511  |
| C | 6.0 | -4.7860766811 | 1.1435466214  | 1.7520289932  |
| C | 6.0 | 5.0404060203  | 1.2196899749  | 1.6745255994  |
| H | 1.0 | -5.1010536936 | -2.3123391340 | 1.2200083771  |
| H | 1.0 | 5.3949364942  | -2.2337262525 | 1.1506567126  |
| H | 1.0 | -5.1329051382 | 2.0469378038  | 1.2403379121  |
| H | 1.0 | 5.3699771251  | 2.1257957279  | 1.1562965752  |
| H | 1.0 | -5.1675546673 | -1.4300777653 | 2.7586656020  |
| H | 1.0 | 5.4723034957  | -1.3449723130 | 2.6850012858  |
| H | 1.0 | -5.1888787241 | 1.1498241291  | 2.7707287916  |
| H | 1.0 | 5.4549360502  | 1.2338089150  | 2.6884199492  |
| H | 1.0 | -3.6751093029 | -1.4332654582 | 1.8042612807  |
| H | 1.0 | 3.9661444749  | -1.3717729713 | 1.7532279665  |
| H | 1.0 | -3.6952329689 | 1.1830188055  | 1.8188879576  |
| H | 1.0 | 3.9499883623  | 1.2462280891  | 1.7539816013  |
| H | 1.0 | 0.1295796104  | -0.0915186211 | 0.7204897277  |
| H | 1.0 | -1.1265994953 | -0.0961726504 | -2.1103439068 |
| H | 1.0 | 1.3445719736  | -0.0828717796 | -2.1288638490 |

**Conformationally restrained heptamethine indocyanine: ORMAS-PT2-PCM/6-31G(d) energies at B3LYP-PCM/6-31G(d) ground state optimized structure (S0)**

$E(S0) = -1612.777156$

$E(S1^*) = -1612.712866$

COORDINATES OF ALL ATOMS ARE (ANGS)

| ATOM | CHARGE | X              | Y             | Z             |
|------|--------|----------------|---------------|---------------|
| C    | 6.0    | 0.1205005513   | -0.1995659869 | -0.5687812589 |
| C    | 6.0    | -1.1049228187  | -0.2125615322 | -1.2431553690 |
| C    | 6.0    | 1.3370010370   | -0.1987378847 | -1.2594547020 |
| C    | 6.0    | -2.3293852387  | -0.1721756409 | -0.5718260738 |
| C    | 6.0    | 2.5699697221   | -0.1402004504 | -0.6052631709 |
| H    | 1.0    | -2.2931345181  | -0.1724639693 | 0.5125885952  |
| H    | 1.0    | 2.5478977102   | -0.1343567376 | 0.4796022340  |
| C    | 6.0    | -3.5717973122  | -0.1272452182 | -1.2251282257 |
| C    | 6.0    | 3.8029548187   | -0.0854673495 | -1.2758964153 |
| C    | 6.0    | -4.7912747412  | -0.0966539272 | -0.5384402866 |
| C    | 6.0    | 5.0315340853   | -0.0324403041 | -0.6071353811 |
| N    | 7.0    | -5.9765058345  | -0.0285650950 | -1.2021709175 |
| N    | 7.0    | 6.2065384180   | 0.0383455310  | -1.2889299840 |
| C    | 6.0    | -7.0750402981  | -0.0566903584 | -0.3237854649 |
| C    | 6.0    | 7.3176286219   | 0.0404808526  | -0.4262413086 |
| C    | 6.0    | -8.4335836238  | -0.0283856815 | -0.6319849261 |
| C    | 6.0    | 8.6711514173   | 0.0790819053  | -0.7547940186 |
| H    | 1.0    | -8.7914081879  | 0.0135834886  | -1.6554318329 |
| H    | 1.0    | 9.0131145594   | 0.1043811996  | -1.7841393322 |
| C    | 6.0    | -9.3321634557  | -0.0626203108 | 0.4416850655  |
| C    | 6.0    | 9.5855061503   | 0.0776080453  | 0.3060027416  |
| H    | 1.0    | -10.3993216795 | -0.0427535019 | 0.2386082064  |
| H    | 1.0    | 10.6493108753  | 0.1064009568  | 0.0870209410  |
| C    | 6.0    | -8.8779192190  | -0.1252679492 | 1.7633018196  |
| C    | 6.0    | 9.1511213426   | 0.0366352432  | 1.6351276846  |
| H    | 1.0    | -9.5946614722  | -0.1515337546 | 2.5790538931  |
| H    | 1.0    | 9.8798052844   | 0.0362468837  | 2.4406686208  |
| C    | 6.0    | -7.5029545178  | -0.1570943750 | 2.0458583759  |
| C    | 6.0    | 7.7808489807   | -0.0074914477 | 1.9382893514  |
| H    | 1.0    | -7.1586143485  | -0.2081878760 | 3.0756532182  |
| H    | 1.0    | 7.4518773631   | -0.0425827785 | 2.9737175830  |
| C    | 6.0    | -6.6015596016  | -0.1246300435 | 0.9901963834  |
| C    | 6.0    | 6.8639950783   | -0.0079302297 | 0.8954756291  |
| C    | 6.0    | -5.0789563082  | -0.1480318058 | 0.9765903325  |
| C    | 6.0    | 5.3419945744   | -0.0550302256 | 0.9043740169  |
| C    | 6.0    | -4.5635075191  | -1.4579325085 | 1.6220438318  |
| C    | 6.0    | 4.8575100479   | -1.3635384571 | 1.5766097711  |
| C    | 6.0    | -4.5244374427  | 1.0982602123  | 1.7119126505  |
| C    | 6.0    | 4.7764929810   | 1.1925382304  | 1.6285273941  |
| H    | 1.0    | -4.9450594405  | -2.3346316641 | 1.0888700790  |
| H    | 1.0    | 5.2461050668   | -2.2418044507 | 1.0511624701  |
| H    | 1.0    | -4.8863092561  | 2.0207383330  | 1.2464643891  |

|   |     |               |               |               |
|---|-----|---------------|---------------|---------------|
| H | 1.0 | 5.1093656608  | 2.1139044560  | 1.1398508572  |
| H | 1.0 | -4.9105520182 | -1.5110508927 | 2.6595327170  |
| H | 1.0 | 5.2195069351  | -1.3959508838 | 2.6098501969  |
| H | 1.0 | -4.8631613364 | 1.0858402405  | 2.7535289687  |
| H | 1.0 | 5.1353783674  | 1.2058393486  | 2.6633431544  |
| H | 1.0 | -3.4714955373 | -1.5074063795 | 1.6286603334  |
| H | 1.0 | 3.7666566984  | -1.4304912014 | 1.5990890500  |
| H | 1.0 | -3.4313069858 | 1.1195578487  | 1.7124133190  |
| H | 1.0 | 3.6833315393  | 1.1910868720  | 1.6502787857  |
| H | 1.0 | 0.1272004414  | -0.1639595224 | 0.5205120074  |
| C | 6.0 | 6.3152881642  | 0.1050839717  | -2.7490965989 |
| C | 6.0 | -6.1070872924 | 0.0610486005  | -2.6594230889 |
| C | 6.0 | -3.5942030083 | -0.1059258694 | -2.7559555166 |
| C | 6.0 | -1.0807601162 | -0.2305137467 | -2.7618387896 |
| C | 6.0 | 1.2911027223  | -0.2218841780 | -2.7776128316 |
| C | 6.0 | 3.8028597999  | -0.0794907563 | -2.8071495693 |
| C | 6.0 | -4.8330979983 | 0.6441652135  | -3.2630595575 |
| C | 6.0 | -2.2985509250 | 0.4968349180  | -3.3230673147 |
| C | 6.0 | 5.0290423283  | 0.6717700543  | -3.3420629198 |
| C | 6.0 | 2.4953746891  | 0.5107400869  | -3.3599376671 |
| O | 8.0 | 0.0994927962  | 0.3997279054  | -3.2629747923 |
| H | 1.0 | 7.1709043088  | 0.7406171578  | -2.9937506948 |
| H | 1.0 | 6.5223263277  | -0.9012954589 | -3.1346822521 |
| H | 1.0 | -6.3146455376 | -0.9402814539 | -3.0576219333 |
| H | 1.0 | -6.9697132357 | 0.6955755200  | -2.8812236418 |
| H | 1.0 | -4.7557183947 | 1.7059900043  | -2.9970040297 |
| H | 1.0 | 4.9488264426  | 1.7366574212  | -3.0895118139 |
| H | 1.0 | 5.0793463263  | 0.5946296086  | -4.4332180647 |
| H | 1.0 | -4.8991369053 | 0.5818580287  | -4.3542671835 |
| H | 1.0 | -2.2999382899 | 0.4286334155  | -4.4167213907 |
| H | 1.0 | -2.2289142236 | 1.5588078393  | -3.0533679481 |
| H | 1.0 | 2.4820003413  | 0.4358859686  | -4.4530716250 |
| H | 1.0 | 2.4222002983  | 1.5738392767  | -3.0957461803 |
| H | 1.0 | 3.8717560779  | -1.1232746615 | -3.1535526228 |
| H | 1.0 | 1.3047137863  | -1.2705527102 | -3.1262621824 |
| H | 1.0 | -1.0934234402 | -1.2781046323 | -3.1138239330 |
| H | 1.0 | -3.6629733388 | -1.1465037569 | -3.1118936875 |



**Conformationally restrained heptamethine indocyanine: ORMAS-PT2-PCM/6-31G(d) energies at TDDFT-B3LYP-PCM/6-31G(d) excited state optimized structure (S1)**

$E(S0^*) = -1612.775352$

$E(S1) = -1612.713153$

COORDINATES OF ALL ATOMS ARE (ANGS)

| ATOM | CHARGE | X              | Y             | Z             |
|------|--------|----------------|---------------|---------------|
| C    | 6.0    | 0.1209720074   | -0.1053162816 | -0.4962603579 |
| C    | 6.0    | -1.1097520742  | -0.1284349329 | -1.1734659763 |
| C    | 6.0    | 1.3421602779   | -0.1120062312 | -1.1906662419 |
| C    | 6.0    | -2.3475766713  | -0.1114769886 | -0.5153389963 |
| C    | 6.0    | 2.5890792133   | -0.0785599189 | -0.5502438604 |
| H    | 1.0    | -2.3260489801  | -0.1066040013 | 0.5691049895  |
| H    | 1.0    | 2.5821866864   | -0.0749509747 | 0.5344421295  |
| C    | 6.0    | -3.5886943865  | -0.0948067795 | -1.1889376257 |
| C    | 6.0    | 3.8200860535   | -0.0435025940 | -1.2414742074 |
| C    | 6.0    | -4.8228266839  | -0.0883646313 | -0.5265006884 |
| C    | 6.0    | 5.0635667573   | -0.0199957184 | -0.5970544450 |
| N    | 7.0    | -6.0076932788  | -0.0626656615 | -1.2229707520 |
| N    | 7.0    | 6.2377602382   | 0.0224885805  | -1.3105887481 |
| C    | 6.0    | -7.1112246037  | -0.1057760537 | -0.3769938724 |
| C    | 6.0    | 7.3539772691   | -0.0034924429 | -0.4806671612 |
| C    | 6.0    | -8.4697268609  | -0.1192430200 | -0.7127554872 |
| C    | 6.0    | 8.7076277588   | 0.0017004490  | -0.8357200935 |
| H    | 1.0    | -8.8057185453  | -0.1067087864 | -1.7441868215 |
| H    | 1.0    | 9.0284530590   | 0.0169268285  | -1.8719179227 |
| C    | 6.0    | -9.3866140231  | -0.1577457986 | 0.3406412335  |
| C    | 6.0    | 9.6399454700   | -0.0218331988 | 0.2045718512  |
| H    | 1.0    | -10.4496909864 | -0.1695219776 | 0.1164414625  |
| H    | 1.0    | 10.6998230716  | -0.0191418150 | -0.0344572685 |
| C    | 6.0    | -8.9595183363  | -0.1843935796 | 1.6754851597  |
| C    | 6.0    | 9.2323461686   | -0.0517179089 | 1.5455071472  |
| H    | 1.0    | -9.6939847233  | -0.2145034511 | 2.4751208247  |
| H    | 1.0    | 9.9785509504   | -0.0695573906 | 2.3345816933  |
| C    | 6.0    | -7.5898970018  | -0.1757416629 | 1.9889843547  |
| C    | 6.0    | 7.8674150653   | -0.0624969363 | 1.8783694775  |
| H    | 1.0    | -7.2685367541  | -0.1994081698 | 3.0270912204  |
| H    | 1.0    | 7.5608669024   | -0.0890311494 | 2.9208497734  |
| C    | 6.0    | -6.6655781961  | -0.1388894875 | 0.9554801283  |
| C    | 6.0    | 6.9281475468   | -0.0410667797 | 0.8580635036  |
| C    | 6.0    | -5.1439204639  | -0.1256390003 | 0.9777743751  |
| C    | 6.0    | 5.4070422603   | -0.0513222131 | 0.9023875872  |
| C    | 6.0    | -4.6139851256  | -1.4145513439 | 1.6586002187  |
| C    | 6.0    | 4.9069603282   | -1.3477643361 | 1.5915084359  |
| C    | 6.0    | -4.6326561462  | 1.1396857810  | 1.7156848975  |
| C    | 6.0    | 4.8867474176   | 1.2065689826  | 1.6466891890  |
| H    | 1.0    | -4.9706224291  | -2.3081445983 | 1.1364807112  |
| H    | 1.0    | 5.2699782448   | -2.2361456343 | 1.0649164600  |
| H    | 1.0    | -5.0099207795  | 2.0498360886  | 1.2385789240  |

|   |     |               |               |               |
|---|-----|---------------|---------------|---------------|
| H | 1.0 | 5.2400830338  | 2.1221248936  | 1.1616666490  |
| H | 1.0 | -4.9752353561 | -1.4546514179 | 2.6920697588  |
| H | 1.0 | 5.2830380248  | -1.3816500260 | 2.6198738153  |
| H | 1.0 | -4.9856873171 | 1.1252098480  | 2.7527535917  |
| H | 1.0 | 5.2572255617  | 1.2002931634  | 2.6777037394  |
| H | 1.0 | -3.5214187510 | -1.4421879829 | 1.6810832703  |
| H | 1.0 | 3.8153785343  | -1.3920406107 | 1.6291952453  |
| H | 1.0 | -3.5404391517 | 1.1860739777  | 1.7304888347  |
| H | 1.0 | 3.7942502796  | 1.2345168887  | 1.6796533189  |
| H | 1.0 | 0.1281021723  | -0.0637919614 | 0.5920352292  |
| C | 6.0 | 6.3110317263  | 0.0754323893  | -2.7715077679 |
| C | 6.0 | -6.1020757089 | -0.0156981601 | -2.6828598357 |
| C | 6.0 | -3.5864171193 | -0.0904437813 | -2.7181974092 |
| C | 6.0 | -1.0773931597 | -0.1640264968 | -2.6900935515 |
| C | 6.0 | 1.2892644237  | -0.1470826456 | -2.7067159818 |
| C | 6.0 | 3.7962271780  | -0.0370859004 | -2.7705454687 |
| C | 6.0 | -4.8380141851 | 0.6082376292  | -3.2645835878 |
| C | 6.0 | -2.2985375256 | 0.5371024357  | -3.2731525519 |
| C | 6.0 | 5.0292764659  | 0.6814188996  | -3.3332501116 |
| C | 6.0 | 2.4915643356  | 0.5725567489  | -3.3059761115 |
| O | 8.0 | 0.0979796665  | 0.4660172260  | -3.1965421434 |
| H | 1.0 | 7.1829116993  | 0.6755285466  | -3.0466119448 |
| H | 1.0 | 6.4674579631  | -0.9413063628 | -3.1566558465 |
| H | 1.0 | -6.2474396192 | -1.0362631237 | -3.0622319717 |
| H | 1.0 | -6.9871273543 | 0.5693638046  | -2.9479999154 |
| H | 1.0 | -4.8066982960 | 1.6762735107  | -3.0145179968 |
| H | 1.0 | 4.9853977621  | 1.7482140840  | -3.0799792533 |
| H | 1.0 | 5.0505696855  | 0.6020870755  | -4.4253056307 |
| H | 1.0 | -4.8738501546 | 0.5257332300  | -4.3559975698 |
| H | 1.0 | -2.2830833773 | 0.4573970942  | -4.3658755750 |
| H | 1.0 | -2.2546932566 | 1.6028193706  | -3.0135128230 |
| H | 1.0 | 2.4616323053  | 0.4943860969  | -4.3984743533 |
| H | 1.0 | 2.4361471170  | 1.6370957124  | -3.0438553606 |
| H | 1.0 | 3.8360161683  | -1.0856244147 | -3.1104953883 |
| H | 1.0 | 1.3022489553  | -1.2030851368 | -3.0372258380 |
| H | 1.0 | -1.0792290095 | -1.2203295169 | -3.0197868329 |
| H | 1.0 | -3.6156320930 | -1.1401633294 | -3.0557196830 |

## Section S7. References

1. Schmidt, M. W.; Baldrige, K. K.; Boatz, J. A.; Elbert, S. T.; Gordon, M. S.; Jensen, J. H.; Koseki, S.; Matsunaga, N.; Nguyen, K. A.; Su, S., General atomic and molecular electronic structure system. *J. Comput. Chem.* **1993**, *14* (11), 1347-1363. See <http://www.msg.ameslab.gov/advances/updatepaper.html> for a current list of features.
2. Gordon, M. S.; Schmidt, M. W., Advances in electronic structure theory: GAMESS a decade later. In *Theory and applications of computational chemistry*, Elsevier: 2005; pp 1167-1189.
3. Bode, B. M.; Gordon, M. S., MacMolPlt: a graphical user interface for GAMESS. *J. Mol. Graphics. Modell.* **1998**, *16* (3), 133-138.
4. Dunning Jr, T. H., Gaussian basis sets for use in correlated molecular calculations. I. The atoms boron through neon and hydrogen. *J. Chem. Phys.* **1989**, *90* (2), 1007-1023.
5. Hehre, W. J.; Ditchfield, R.; Pople, J. A., Self-consistent molecular orbital methods. XII. Further extensions of Gaussian-type basis sets for use in molecular orbital studies of organic molecules. *J. Chem. Phys.* **1972**, *56* (5), 2257-2261.
6. Kohn, W.; Sham, L. J., Self-consistent equations including exchange and correlation effects. *Phys. Rev.* **1965**, *140* (4A), A1133.
7. Becke, A., Density-functional thermochemistry: The role of exact exchange. *J. Chem. Phys.* **1993**, *98* (5), 648-5.
8. Stephens, P. J.; Devlin, F. J.; Chabalowski, C. F. N.; Frisch, M. J., Ab initio calculation of vibrational absorption and circular dichroism spectra using density functional force fields. *J. Phys. Chem.* **1994**, *98* (45), 11623-11627.
9. Hertwig, R. H.; Koch, W., On the parameterization of the local correlation functional. What is Becke-3-LYP? *Chem. Phys. Lett.* **1997**, *268* (5-6), 345-351.
10. Runge, E.; Gross, E. K. U., Density-functional theory for time-dependent systems. *Phys. Rev. Lett.* **1984**, *52* (12), 997-1000.
11. Gross, E. K. U.; Kohn, W., Time-dependent density-functional theory. In *Adv. Quantum Chem.*, Elsevier: 1990; Vol. 21, pp 255-291.
12. Van Leeuwen, R., Key concepts in time-dependent density-functional theory. *Int. J. Mod. Phys.* **2001**, *15* (14), 1969-2023.
13. Casida, E. M., In *Recent Advances in Density Functional Methods, Recent Advances in Computational Chemistry*, edited by D. P. Chong (World Scientific, Singapore, 1995), Vol. 1, pp 155-192.
14. Chiba, M.; Tsuneda, T.; Hirao, K., Excited state geometry optimizations by analytical energy gradient of long-range corrected time-dependent density functional theory. *J. Chem. Phys.* **2006**, *124* (14), 144106.
15. Casida, E. M., *Recent Developments and Applications of Modern Density Functional Theory, Theoretical and Computational Chemistry*, edited by J. M. Seminario (Elsevier, Amsterdam, 1996) **1996**, 391-493.
16. Fedorov, D.; Kitaura, K., *The fragment molecular orbital method: practical applications to large molecular systems*. CRC press: 2009.
17. Lebedev, V. I.; Laikov, D. N. In *A quadrature formula for the sphere of the 131st algebraic order of accuracy*, Dokl. Math., Pleiades Publishing, Ltd. (Плеядес Паблишинг, Лтд): 1999; pp 477-481.

18. Murray, C. W.; Handy, N. C.; Laming, G., Quadrature schemes for integrals of density functional theory. *J. Mol. Phys.* **1993**, *78* (4), 997-1014.
19. Ivanic, J., Direct configuration interaction and multiconfigurational self-consistent-field method for multiple active spaces with variable occupations. II. Application to oxoMn (salen) and N2O4. *J. Chem. Phys.* **2003**, *119* (18), 9377-9385.
20. Ivanic, J., Direct configuration interaction and multiconfigurational self-consistent-field method for multiple active spaces with variable occupations. I. Method. *J. Chem. Phys.* **2003**, *119* (18), 9364-9376.
21. Roskop, L.; Gordon, M., Quasi-degenerate second-order perturbation theory for occupation restricted multiple active space self-consistent field reference functions. *J. Chem. Phys.* **2011**, *135* (4), 044101.
22. Miertuš, S.; Scrocco, E.; Tomasi, J., Electrostatic interaction of a solute with a continuum. A direct utilization of AB initio molecular potentials for the prediction of solvent effects. *J. Chem. Phys.* **1981**, *55* (1), 117-129.
23. Li, H.; Jensen, J. H., Improving the efficiency and convergence of geometry optimization with the polarizable continuum model: New energy gradients and molecular surface tessellation. *J. Comput. Chem.* **2004**, *25* (12), 1449-1462.
24. Li, H., Quantum mechanical/molecular mechanical/continuum style solvation model: Linear response theory, variational treatment, and nuclear gradients. *J. Chem. Phys.* **2009**, *131* (18), 184103.
25. Wang, Y.; Li, H., Excited state geometry of photoactive yellow protein chromophore: a combined conductorlike polarizable continuum model and time-dependent density functional study. *J. Chem. Phys.* **2010**, *133* (3), 034108.
